# Supplementary material for: The impact of global land-cover change on the terrestrial water cycle
Source: Springer Nature journal article supplement (doi:10.1038/nclimate1690), 2012-10-12
Supplement: 41558_2013_BFnclimate1690_MOESM427_ESM.pdf [file 41558_2013_BFnclimate1690_MOESM427_ESM.pdf]

## The impact of global land-cover change on the terrestrial water cycle

The Supplementary Information included in our paper comprises:

1. Supplementary Table 1. Estimates of average annual terrestrial evapotranspiration, separated by land cover type;
2. Supplementary Table 2. For MGIS, land cover classes, map data sources, number of ET point estimates and kriged global mean;
3. Supplementary Figure 1. Maps of global land cover change for land surface model applications; and
4. Supplementary Methods.

SUPPLEMENTARY TABLE 1 FOR “THE IMPACT OF GLOBAL LAND COVER CHANGE ON THE TERRESTRIAL WATER CYCLE”

Supplementary Tables S1.1 to S1.19. Estimates of average annual terrestrial evapotranspiration, separated by land cover type.

Table S1.1. Annual evapotranspiration of non-irrigated croplands

| Source                                                                                                                                  | ET                                                                                                                           | Method                                                                                      | Notes                                                                                                                                                                                                                             |
|-----------------------------------------------------------------------------------------------------------------------------------------|------------------------------------------------------------------------------------------------------------------------------|---------------------------------------------------------------------------------------------|-----------------------------------------------------------------------------------------------------------------------------------------------------------------------------------------------------------------------------------|
| Arnold & Allen, 1996                                                                                                                    | 608, 617 mm/yr                                                                                                               | multicomponent water budget model SWAT, using data from the 1950s, of the hydrologic budget | Illinois watersheds: Panther creek basin, 80% corn, oats, and soy beans, 20% pasture, woodland, and farm lots, 246 km <sup>2</sup> ; Goose Creek basin, 86% agriculture, 14% woodland, pasture and farm lots, 122 km <sup>2</sup> |
| Akinremi <i>et al.</i> , 1996                                                                                                           | 163, 161, 174, 235, 157, 164, 135, 226, 248, 226, 233, 207, 157, 126, 144, 214, 143, 153, 135, 225, 212, 217, 203, 180 mm/yr | soil water balance model                                                                    | various crop rotations of wheat                                                                                                                                                                                                   |
| Aslyng, 1960<br>Kristensen, 1959<br>Aslyng & Kristensen, 1958<br>(Aslyng and Kristensen, 1958; Lincare, 1997)<br>Aslyng & Nielsen, 1960 | 392 mm/yr                                                                                                                    |                                                                                             | grass plot near Copenhagen                                                                                                                                                                                                        |
| Bastiaanssen & Bandara, 2001                                                                                                            | 1321 mm/yr                                                                                                                   | remote sensing                                                                              | homesteads with coconuts, papayas, bananas, and mangos, in Sri Lanka                                                                                                                                                              |
| Brye <i>et al.</i> , 2000                                                                                                               | 511, 372, 484, 355 mm/yr                                                                                                     | soil water balance                                                                          | for maize ecosystems; treated by no tillage and by chisel plough                                                                                                                                                                  |
| Choudhury <i>et al.</i> , 1998                                                                                                          | 639 mm/yr                                                                                                                    | biophysical process-based model with satellite & ancillary data                             | cropland                                                                                                                                                                                                                          |
| Choudhury <i>et al.</i> , 1998                                                                                                          | 467 mm/yr                                                                                                                    | biophysical process-based model with satellite & ancillary data                             | cropland                                                                                                                                                                                                                          |
| Choudhury <i>et al.</i> , 1998                                                                                                          | 672 mm/yr                                                                                                                    | biophysical process-based model with satellite & ancillary data                             | cropland                                                                                                                                                                                                                          |
| Choudhury <i>et al.</i> , 1998                                                                                                          | 312 mm/yr                                                                                                                    | biophysical process-based model with satellite & ancillary data                             | cropland                                                                                                                                                                                                                          |
| Choudhury <i>et al.</i> , 1998                                                                                                          | 620 mm/yr                                                                                                                    | biophysical process-based model with satellite & ancillary data                             | cropland                                                                                                                                                                                                                          |

|                                                     |                                                                                    |                                                                                           |                                                                                                     |
|-----------------------------------------------------|------------------------------------------------------------------------------------|-------------------------------------------------------------------------------------------|-----------------------------------------------------------------------------------------------------|
| Choudhury <i>et al.</i> , 1998                      | 692 mm/yr                                                                          | biophysical process-based model with satellite & ancillary data                           | cropland                                                                                            |
| Choudhury <i>et al.</i> , 1998                      | 507 mm/yr                                                                          | biophysical process-based model with satellite & ancillary data                           | cropland                                                                                            |
| Dunn & Mackay, 1995                                 | 554 (SD = 36.5) mm/yr                                                              | model, based on Penman-Monteith with Rutter interception                                  | arable land in the Tyne Basin in North East England                                                 |
| Gervois <i>et al.</i> , 2004                        | 0.41 m/yr                                                                          | ORCHIDEE model                                                                            | soya in France                                                                                      |
| Gervois <i>et al.</i> , 2004                        | 0.39 m/yr                                                                          | ORCHIDEE model                                                                            | winter wheat in Grigon, France                                                                      |
| Giambelluca, 1986                                   | 265, 307, 283 mm/yr                                                                | model, pan, Penman                                                                        | pineapple, not irrigated                                                                            |
| Haise & Viets, 1957                                 | 19.4, 19.7, 20.3, 21.6, 24.2, 23.9, 22.9, 24.8, 28.3, 23.6, 30.4, 30.2 inches/year | n/a                                                                                       | Amarillo experiment station, USDA, Bushland, Texas                                                  |
| Krestovsky, 1969b<br>Shiklomanov & Krestovsky, 1988 | 522 (SD 173) mm/yr                                                                 |                                                                                           | crops and fallow in southern taiga subzone of European former USSR                                  |
| Lincare, 1997                                       | 535 mm/yr                                                                          | eddy covariance                                                                           | cultivation field (wheat) in Zhangye oasis, China                                                   |
| Liu & Kotoda, 1998                                  | 554.6 mm/yr                                                                        | Kotoda 1986 and Advection-Aridity (Brutsaert and Stricket, 1979) models, eddy correlation | ploughed land in Heihi River, NW China, middle part of Hexi corridor                                |
| L'vovich, 1979                                      | 173 mm/yr                                                                          |                                                                                           | spring wheat, Kamennaya Steppe                                                                      |
| Mahmood & Hubbard, 2002                             | 462 mm/yr                                                                          | soil water balance model                                                                  | rainfed maize in tall grass - short grass transition in Nebraska, USA                               |
| Makino <i>et al.</i> , 1999                         | 784.25 mm/yr                                                                       | modified Penman method                                                                    | agriculture in Doki river Basin in Shikoku Island, Japan                                            |
| Mika <i>et al.</i> , 2001                           | 286-296 mm/yr                                                                      | micrometeorological measurements, Antal model                                             | watershed in Hungary that is 74% cultivated, basin of the Tisza river                               |
| Molchanov, 1973                                     | 435 mm/yr                                                                          | water balance                                                                             | field in Lugansk district of steppe zone of European Russia, may be underestimated (Gidromet, 1976) |
| Morton, 1983a                                       | 420 mm/yr                                                                          | CRAE model                                                                                | agricultural land around the Edmonton International Airport                                         |
| Pattey, 2004, pers comm                             | 715.14 mm/yr                                                                       |                                                                                           | grain corn at Greenbelt Farm                                                                        |
| Roberts, 1998                                       | 306-409 mm/yr                                                                      | empirical relations from other studies                                                    | arable land in England                                                                              |
| Scott & Sudmeyer, 1993                              | 471, 458, 430, 420, 346 mm/yr                                                      | ventilated chamber technique                                                              | crops (lupins, oats, rape, barley, and wheat) near Collie in the southwest of Western Australia.    |
| Sene, 1996                                          | 261 mm/yr                                                                          | soil water balance                                                                        | sparse vine crop in southern Spain (dry region), using a two-component energy combination model     |

|                                |                             |                                  |                                                                                                                |
|--------------------------------|-----------------------------|----------------------------------|----------------------------------------------------------------------------------------------------------------|
| Shiklomanov & Krestovsky, 1988 | 520, 460, 440, 400<br>mm/yr |                                  | winter crops, summer crops, row crops, and bare fallow in southern taiga subzone of European former USSR       |
| Szilagyi <i>et al.</i> , 2001  | 1.7 mm/day                  | micrometeorological measurements | Altamaha river basin near Doctortown GA; a mix of urban, forest, and agriculture areas; average from 1948-1996 |

Table S1.2. Annual evapotranspiration of irrigated croplands

| Source                            | ET                             | Method                                                                                                                               | Notes                                                                                                      |
|-----------------------------------|--------------------------------|--------------------------------------------------------------------------------------------------------------------------------------|------------------------------------------------------------------------------------------------------------|
| Ablew & Khanal, 1994              | 102.4 cm/yr                    | catchment water balance                                                                                                              | Everglades Agricultural Area in South Florida; sugarcane, vegetables, sod, rice, ornamental nursery plants |
| Allen, R.G., 2000                 | 730-800 mm/yr                  | range ET <sub>o</sub> (reference ET) <sub>o</sub> from the FAO-56-PM equation and the 1985 Hargreaves equation (both applied hourly) | cotton near Menemen, Turkey                                                                                |
| Allen, R.G., 2000                 | 790-880 mm/yr                  | range ET <sub>o</sub> from the FAO-56-PM equation and the 1985 Hargreaves equation (both applied hourly)                             | grapes near Gediz River, Turkey                                                                            |
| Allen, R.G., 2000                 | 690-770 mm/yr                  | range ET <sub>o</sub> from the FAO-56-PM equation and the 1985 Hargreaves equation (both applied hourly)                             | cotton near Gediz River, Turkey                                                                            |
| Allen, R.G., 2000                 | 1020-1160 mm/yr                | range ET <sub>o</sub> from the FAO-56-PM equation and the 1985 Hargreaves equation (both applied hourly)                             | orchard near Gediz River, Turkey                                                                           |
| Anac <i>et al.</i> , 1999         | 834-899 mm/yr                  |                                                                                                                                      | cotton in Turkey                                                                                           |
| Ayars <i>et al.</i> , 1999        | 549, 691, 437, 645 mm/yr       | soil water balance                                                                                                                   | cotton in San Joaquin Valley                                                                               |
| Ayars <i>et al.</i> , 2003        | 1.034 m/yr                     | lysimeter and water balance                                                                                                          | assuming minimal winter ET. For mature O'Henry Peaches, California                                         |
| Bastiaanssen <i>et al.</i> , 2002 | 580, 410, 360, 970, 1400 mm/yr | SEBAL algorithm for NOAA-AVHRR satellite data                                                                                        | cotton, rice, wheat, sugarcane, and mangroves in Indus River basin, Pakistan                               |
| Bastiaanssen & Bandara, 2001      | 1405 mm/yr                     | remote sensing                                                                                                                       | rice paddy in Kirindi Oya, Sri Lanka                                                                       |
| Batchelor, 1984                   | 2333 mm/yr                     | Penman estimation                                                                                                                    | for rice paddy, calculated using the Penman 1963 equation                                                  |
| Batchelor, 1984                   | 1896 mm/yr                     | Penman estimation                                                                                                                    | for rice paddy, calculated using the Modified Penman equation.                                             |
| Baumhardt & Lascano, 1999         | 420 mm/yr                      | soil water balance                                                                                                                   | cotton in Wellman, Texas                                                                                   |
| Cohen <i>et al.</i> , 2002        | 1302 +/- 48 mm/yr              | Penman-Monteith equation (reference crop ET)                                                                                         | Bet Dagan, Israel                                                                                          |
| Conley <i>et al.</i> , 2001       | 293, 559, 429, 664 mm/yr       | eddy covariance                                                                                                                      | sorghum (C4) at Maricopa Agricultural Centre, Arizona, for control dry and control wet treatments          |
| Davis, 1983                       | 700 mm/yr                      |                                                                                                                                      | cotton in San Joaquin Valley                                                                               |
| Flohn, 1972                       | 168 cm/yr                      |                                                                                                                                      | average for three oases in Southern Tunisia with manifold, multi-layered horticulture                      |
| Gervois <i>et al.</i> , 2004      | 0.46 m/yr                      | ORCHIDEE model                                                                                                                       | corn and wheat                                                                                             |

|                                    |                                |                                                                                         |                                                                                                                                                                                                      |
|------------------------------------|--------------------------------|-----------------------------------------------------------------------------------------|------------------------------------------------------------------------------------------------------------------------------------------------------------------------------------------------------|
| Giambelluca, 1986                  | 1067 (SD = 627) mm/yr          | Potential ET conversion by vegetation cover. Potential ET measured by PAN, P48, M(SREA) | sugarcane and pineapple in Oahu, Hawaii                                                                                                                                                              |
| Giambelluca, 1986                  | 1458 (SD = 27)                 | model, pan, Penman                                                                      | sugarcane irrigated                                                                                                                                                                                  |
| Grimes, 1982                       | 760 mm/yr                      |                                                                                         | cotton in San Joaquin Valley                                                                                                                                                                         |
| Hauser & Gimon, 2004               | 1514 mm/yr                     | Lysimeter                                                                               | irrigated Alfalfa in Amarillo station                                                                                                                                                                |
| Hauser & Gimon, 2004               | 809 mm/yr                      | Lysimeter                                                                               | irrigated corn in Amarillo station                                                                                                                                                                   |
| Hoffman, 1985                      | 230-580 mm/yr                  | soil water balance                                                                      | 3 crop rotations with high frequency irrigation: wheat, grain sorghum, lettuce, then oat, tomato and cauliflower, then barley, cowpea and celery; at US Salinity Laboratory in Riverside, California |
| Hoffman, 1985                      | 1350-1750 mm/yr                | soil water balance                                                                      | variable irrigation frequency, with tall fescue; at US Salinity Laboratory in Riverside, California                                                                                                  |
| Hunsaker <i>et al.</i> , 1998      | 852-867, 88-894, 932-939 mm/yr | model, based on AZSCHED and Kincaid & Heermann                                          | cotton in Arizona                                                                                                                                                                                    |
| Hutmacher <i>et al.</i> , 2002     | 1900 mm/yr                     | n/a                                                                                     | alfalfa in arid areas                                                                                                                                                                                |
| Jin <i>et al.</i> , 1999           | 537-353 mm/yr                  | evaluated from field experiments in the area                                            | cotton in Wangtong experimental station, Heilonggang region in the East Hebei Plain of north China                                                                                                   |
| Kergoat <i>et al.</i> , 2002       | 883, 933, 891, 956, 923 mm/yr  | global vegetation model                                                                 | grass / crops using CLIM, RAD, STOM, FERT, and MAX simulations                                                                                                                                       |
| Kutywayo, 2004                     | 1546 mm/yr                     | eddy covariance                                                                         | Coffee Research Station, Chipinge, Zimbabwe                                                                                                                                                          |
| Liu <i>et al.</i> , 2002           | 423.5-453.0 mm/yr              | lysimeter                                                                               | irrigated winter wheat and maize, using a large-scale weighing lysimeter, at Luancheng Station in the North China Plain                                                                              |
| Liu, Hunsaker <i>et al.</i> , 2002 | 403-512 mm/yr                  | soil water balance, 3 m soil depth                                                      | maize grown in loess tableland at Shaanxi, China                                                                                                                                                     |
| L'vovich, 1979                     | 397 mm/yr                      |                                                                                         | irrigated wheat, southern Trans-Volga                                                                                                                                                                |
| Machado, 2004                      | 1080.8                         | n/a                                                                                     | wheat and rotational crops                                                                                                                                                                           |
| Mahmood & Hubbard, 2002            | 694 mm/yr                      | soil water balance model                                                                | irrigated maize in tall grass - short grass transition in Nebraska, USA                                                                                                                              |
| Mierau, 1974                       | 1018 mm/yr                     |                                                                                         | Everglades Agricultural Area                                                                                                                                                                         |
| Mo <i>et al.</i> , 2004            | 636-1525 mm/yr                 | process-based distributed model                                                         | arid farmland and irrigated crop, Lushi basin, China                                                                                                                                                 |
| Olivier, 1961                      | 1729 mm/yr                     | Olivier method                                                                          | Shambe Swamps, Sudan, papyrus                                                                                                                                                                        |

|                                    |                               |                                                               |                                                                         |
|------------------------------------|-------------------------------|---------------------------------------------------------------|-------------------------------------------------------------------------|
| Olivier, 1961, Shahin, 1985        | 1265, 964, 1842 mm/yr         | Olivier method, Hargreaves formula and Blaney-Criddle formula | Wad-Medani, Sudan, cotton (assuming minimal ET during summer (left dry) |
| Pereira, 1964                      | 880 mm/yr                     | catchment water balance                                       | maize in Kimakia catchment                                              |
| Preito & Angueria, 1999            | 736, 495, 631 mm/yr           |                                                               | cotton in Argentina                                                     |
| Raymond & Rezin, 1989              | 0.902-0.917 m/yr              | remote sensing, water use rates                               | agriculture in Parker Valley, Southern Arizona                          |
| Saranga <i>et al.</i> , 1998       | 491-566, 349-390 mm/yr        | pan, soil water content, budget                               | cotton in Israel                                                        |
| Sarwar & Bastiaanssen, 2001        | 610-720, 380-400 mm/yr        | SWAP model, soil water balance model                          | cotton and wheat in Indus River basin, Pakistan                         |
| Shih & Gascho, 1980                | 1546, 1824, 1291, 1463 mm/yr  |                                                               | sugarcane grown in the Everglades Agricultural Area                     |
| Shih, 1983                         | 1084-1418 mm/yr               |                                                               | Everglades Agricultural Area                                            |
| Soppe, 2000<br>Ayars & Soppe, 2001 | 710, 845, 567, 561, 561 mm/yr |                                                               | cotton in San Joaquin Valley                                            |
| Sternitzke & Elliott, 1986         | 0.47, 0.55, 0                 | n/a                                                           | for well-watered alfalfa, corn, sorghum, soybe                          |
| Styles & Bernasconi, 1994          | 713-805 mm/yr                 |                                                               | cotton in San Joaquin Valley                                            |
| Sweeten & Jordan, 1987             | 710-810 mm/yr                 |                                                               | peak ET yields when irrigation available                                |
| TEN, 2004                          | 60.61 in/yr                   | Potential Evapotranspiration (PET) Estimation                 | where PET represents ET for irrigated crops                             |
| TEN, 2004                          | 63.96 in/yr                   | PET Estimation                                                | where PET represents ET for irrigated crops                             |
| TEN, 2004                          | 62.69 in/yr                   | PET Estimation                                                | where PET represents ET for irrigated crops                             |
| TEN, 2004                          | 61.66 in/yr                   | PET Estimation                                                | where PET represents ET for irrigated crops                             |
| TEN, 2004                          | 62.66 in/yr                   | PET Estimation                                                | where PET represents ET for irrigated crops                             |
| TEN, 2004                          | 61.84 in/yr                   | PET Estimation                                                | where PET represents ET for irrigated crops                             |
| TEN, 2004                          | 61.17 in/yr                   | PET Estimation                                                | where PET represents ET for irrigated crops                             |
| TEN, 2004                          | 63.62 in/yr                   | PET Estimation                                                | where PET represents ET for irrigated crops                             |
| TEN, 2004                          | 66.05 in/yr                   | PET Estimation                                                | where PET represents ET for irrigated crops                             |
| TEN, 2004                          | 44.28 in/yr                   | PET Estimation                                                | where PET represents ET for irrigated crops                             |
| TEN, 2004                          | 61.26 in/yr                   | PET Estimation                                                | where PET represents ET for irrigated crops                             |

|                               |                      |                                                              |                                                                                                               |
|-------------------------------|----------------------|--------------------------------------------------------------|---------------------------------------------------------------------------------------------------------------|
| TEN, 2004                     | 63.12 in/yr          | PET Estimation                                               | where PET represents ET for irrigated crops                                                                   |
| TEN, 2004                     | 64.98 in/yr          | PET Estimation                                               | where PET represents ET for irrigated crops                                                                   |
| TEN, 2004                     | 58.49 in/yr          | PET Estimation                                               | where PET represents ET for irrigated crops                                                                   |
| TEN, 2004                     | 63.62 in/yr          | PET Estimation                                               | where PET represents ET for irrigated crops                                                                   |
| TEN, 2004                     | 62.78 in/yr          | PET Estimation                                               | where PET represents ET for irrigated crops                                                                   |
| TEN, 2004                     | 61.27 in/yr          | PET Estimation                                               | where PET represents ET for irrigated crops                                                                   |
| TEN, 2004                     | 62.73 in/yr          | PET Estimation                                               | where PET represents ET for irrigated crops                                                                   |
| TEN, 2004                     | 60.15 in/yr          | PET Estimation                                               | where PET represents ET for irrigated crops                                                                   |
| Unland <i>et al.</i> , 1998   | 1.462 m/yr           | micrometeorological measurements, Bowen-Ratio Energy Balance | irrigated crop in Santa Cruz River in southern Arizona                                                        |
| Urassa & Raphael, 2004        | 1300 mm/yr           | n/a                                                          | rice Farm, Morogoro, Tanzania                                                                                 |
| USDA, 2004                    | 800 mm/yr            | PET Estimation                                               | for irrigated agriculture in Texas high plains                                                                |
| Van Dijk <i>et al.</i> , 2001 | 800, 850, 1500 mm/yr | water balance, micrometeorological measurements, literature  | irrigated rice fields, rainfed mixed crops, and fallow land in Ciumutuk river catchment, West Java, Indonesia |
| Wanjura <i>et al.</i> , 1996  | 620, 477, 605 mm/yr  |                                                              | cotton in San Joaquin Valley                                                                                  |
| Zhang <i>et al.</i> , 2004    | 370.5 (stdev)        | soil water balance                                           | irrigated winter wheat and maize (rotated)                                                                    |

Table S1.3. Annual evapotranspiration of human built-up areas

| Source                           | ET              | Method                     | Description                                                                                                                                                              |
|----------------------------------|-----------------|----------------------------|--------------------------------------------------------------------------------------------------------------------------------------------------------------------------|
| Aston, 1977                      | 1128 mm/yr      | pan                        | Hong Kong                                                                                                                                                                |
| Baumgartner, 1972<br>Gohre, 1949 | 356 - 706 mm/yr | lysimeter                  | short lawn, range from normal to high water level; assumed per year; Eberswalde, Germany                                                                                 |
| Bell, 1972                       | 736 mm/yr       | modeled (Penman basis)     | Sidney, Australia                                                                                                                                                        |
| Campbell, 1982                   | 451 mm/yr       | not stated                 | 71% of precipitation, annual average precipitation is 635 mm (International Station Meteorological Climate Summary, Version 4.0, 110 years charted: Mexico City, Mexico) |
| Christen & Vogt, 2004            | 300 mm/yr       | energy balance             | Basel, Switzerland                                                                                                                                                       |
| Dennehy & McMahon, 1987          | 951, 953 mm/yr  | Bowen Ratio-Energy Balance | low-level radioactive waste burial site, continuous hourly measurements of meteorological variables; near Barnwell, South Carolina                                       |



|                               |                     |                                                                                         |                                                                                                                          |
|-------------------------------|---------------------|-----------------------------------------------------------------------------------------|--------------------------------------------------------------------------------------------------------------------------|
| Dow & DeWalle, 2000           | 75 cm/yr (SD 8.7)   | catchment water balance                                                                 | varying levels of development, watersheds range from 5% developed to 88%; 21 watersheds in Eastern USA                   |
| Dunn & Mackay, 1995           | 438 (SD 24.1) mm/yr | model, based on Penman-Monteith with Rutter interception                                | "conurbations" in the Tyne Basin in North East England                                                                   |
| Giambelluca, 1986             | 689 (SD 336) mm/yr  | Potential ET conversion by vegetation cover. PET measured by PAN, P48, M(SREA)          | parks, low, medium, and high density urban in Oahu, HI                                                                   |
| Gohre, 1949                   | 178 mm/yr           | lysimeter                                                                               | for bare soil                                                                                                            |
| Grimmond & Oke, 1986          | 577.7 mm/yr         | water balance model                                                                     | 32% of precipitation; using water balance model; input data derived from measurements conducted at 3 sites, Vancouver BC |
| Hauser & Gimon, 2004          | 767, 764 mm/yr      | lysimeter                                                                               | Simulated Landfill in Coshocton Ohio                                                                                     |
| Healy <i>et al.</i> , 1989    | 626, 648, 728 mm/yr | Bowen Ratio-Energy Balance, water budget, aerodynamic profile                           | low-level radioactive-waste disposal site near Sheffield, Illinois                                                       |
| Jia <i>et al.</i> , 2002      | 381-471 mm/yr       | distributed watershed model                                                             | present conditions and for future development scenarios; Chiba Prefecture, Japan                                         |
| Klohn-Crippen, 1999           | 264, 355 mm/yr      | catchment water balance                                                                 | 40% impervious urban watersheds                                                                                          |
| Lamourne <i>et al.</i> , 1994 | 373 mm/yr           | water budget                                                                            | 55% of precipitation, precipitation 679 mm; Johannesburg, South Africa                                                   |
| Lindh, 1978                   | 360 mm/yr           | n/a                                                                                     | Stockholm, Sweden                                                                                                        |
| Liu & Kotoda, 1998            | 432.6 mm/yr         | Kotoda 1986 & Advection-Aridity (Brutsaert and Stricket, 1979) models, eddy correlation | urban areas, NW China, middle part of Hexi corridor; coarse sand and small pebbles with sparse scrub vegetation          |
| L'Vovich & Chernogayeva, 1977 | 400 mm/yr           | model                                                                                   | Moscow, Russia                                                                                                           |
| Morton, 1983a                 | 358 mm/yr           | CRAE model                                                                              | urban land around the Edmonton Airport, Alberta, Canada                                                                  |
| Stephenson, 1994              | 457 mm/yr           | catchment water balance                                                                 | suburban catchments near Johannesburg, South Africa                                                                      |
| Szilagyi <i>et al.</i> , 2001 | 1.7 mm/day          | micrometeorological measurements                                                        | 2 precipitation stations in the 35,224 km <sup>2</sup> Altamaha river basin near Doctortown GA; average from 1948-1996   |
| Thornthwaite & Mather, 1955   | 509 mm/yr           | soil water budget                                                                       | 300 mm depth of water stored in a soil layer at field capacity; Berkeley, California                                     |
| Thornthwaite & Mather, 1955   | 730 mm/yr           | soil water budget                                                                       | 300 mm depth of water stored in a soil layer at field capacity; Seabrook, New Jersey                                     |
| Thornthwaite & Mather, 1955   | 21.02 in/yr         | assume soil water budget                                                                | median value of actual ET for 25 year period, Hays, Kansas                                                               |
| Thornthwaite & Mather, 1955   | 23.19 in/yr         | assume soil water budget                                                                | median value of actual ET for 25 year period; Charles City, Iowa                                                         |

|                             |             |                          |                                                                             |
|-----------------------------|-------------|--------------------------|-----------------------------------------------------------------------------|
| Thornthwaite & Mather, 1955 | 23.82 in/yr | assume soil water budget | median value of actual ET for 25 year period, Wooster, Ohio                 |
| Thornthwaite & Mather, 1955 | 33.07 in/yr | assume soil water budget | median value of actual ET for 25 year period; Auburn, Alabama               |
| Thornthwaite & Mather, 1955 | 31.4 in/yr  | assume soil water budget | annual average; Marked Tree, Arkansas                                       |
| Van der Ven, 1988           | 179 mm/yr   | water balance            | 23% of annual average precipitation [779.5 mm (WMO)]; Lelystad, Netherlands |
| Van der Ven, 1988           | 119 mm/yr   | water balance            | for Lund, Sweden                                                            |

Table S1.4. Annual evapotranspiration of impounded areas (reservoirs) (*ET*)

| Source                         | ET              | Method                                       | Notes                                                                                     |
|--------------------------------|-----------------|----------------------------------------------|-------------------------------------------------------------------------------------------|
| Afansyev & Leksakova, 1973     | 341, 296 mm/yr  | lake water balance                           | Lake Baikal                                                                               |
| Ahmad, 1982                    | 50-110 maf/yr   | n/a                                          | annual lake evaporation over Pakistan                                                     |
| Antal <i>et al.</i> , 1973     | 860 mm/yr       | energy balance and water balance             | Lake Balaton, Hungary                                                                     |
| Ballinger & Thornton, 1982     | 1541 mm/yr      | class A evaporation pan                      | Lake McIlwaine, Rhodesia                                                                  |
| Bastiaanssen & Bandara, 2001   | 1773 mm/yr      | remote sensing                               | Tank in Kirindi Oya, Sri Lanka                                                            |
| Berger, 2001                   | 63.64 in/yr     | Bowen Ratio-Energy Balance, eddy correlation | over open water Ruby Lake National Wildlife Refuge Area, Ruby Valley, Northeastern Nevada |
| Braslavskii & Vikulina, 1963   | 605-619 mm/yr   | water balance                                | forest zone, former USSR                                                                  |
| Braslavskii & Vikulina, 1963   | 593-610 mm/yr   | water balance                                | forest-steppe zone (eastern half), former USSR                                            |
| Braslavskii & Vikulina, 1963   | 724-792 mm/yr   | water balance                                | forest-steppe zone (western half), former USSR                                            |
| Braslavskii & Vikulina, 1963   | 888-956 mm/yr   | water balance                                | steppe zone (western half), former USSR                                                   |
| Braslavskii & Vikulina, 1963   | 865-938 mm/yr   | water balance                                | steppe zone (eastern half), former USSR                                                   |
| Braslavskii & Vikulina, 1963   | 991-1130 mm/yr  | water balance                                | zone of dry steppes and semi-deserts, former USSR                                         |
| Braslavskii & Vikulina, 1963   | 1252-1363 mm/yr | water balance                                | desert zone, former USSR                                                                  |
| Braslavskii & Vikulina, 1963   | 1505-1666 mm/yr | water balance                                | extreme south of central Asia, former USSR                                                |
| Cherkasov <i>et al.</i> , 1973 | 520 mm/yr       | lake water balance                           | Lake Khubsugul (Kosogol), northern Mongolian People's Republic                            |

|                                     |                      |                                             |                                                                                                                                                     |
|-------------------------------------|----------------------|---------------------------------------------|-----------------------------------------------------------------------------------------------------------------------------------------------------|
| Cleverly <i>et al.</i> , 2002       | 74 cm/yr             | 3-d eddy covariance                         | Tamarix ramosissima; site on Sevilleta National Wildlife Refuge outside of San Acacia NM, no annual flooding, Rio Grande riparian areas, New Mexico |
| Cleverly <i>et al.</i> , 2002       | 122 cm/yr            | 3-d eddy covariance                         | Bosque del apache NWR, flooded site; Rio Grande riparian areas, New Mexico                                                                          |
| Cohen <i>et al.</i> , 2002          | 1729 +/- 64 mm/yr    | Penman-Monteith                             | for Bet Dagan, Israel                                                                                                                               |
| Farnsworth <i>et al.</i> , 1982     | 0.6-0.8 m/yr         | field data using the Bowen method           | northeastern United States                                                                                                                          |
| German, 2000                        | 57.4, 53.1 in/yr     | Bowen Ratio-Energy Balance                  | two open water sites in Florida Everglades                                                                                                          |
| German, E.R., unpublished           | 53.22-55.54 in/yr    | Bowen Ratio-Energy Balance                  | two open water sites in Florida Everglades                                                                                                          |
| Griffiths, 1972                     | 2087, 2160 mm/yr     | CRLE model                                  | Lake Nasser, at Wadi Halfa                                                                                                                          |
| Hirota, 2001                        | 760-815 mm/yr        | heat balance model and Force-Restore method | open water near lawn from routine meteorological data at Chiang Mai in the Chao Phraya river basin in Thailand                                      |
| Hirota, 2001                        | 1080-1140 mm/yr      | heat balance model and Force-Restore method | open water near bare areas in Bangkok from routine meteorological data in the Chao Phraya river basin in Thailand                                   |
| Hurst & Phillips, 1931              | 1.9 mm/day           | atmometer                                   | Sakha                                                                                                                                               |
| Hurst & Phillips, 1931              | 2.3 mm/day           | atmometer                                   | Cairo (Ezbekiya)                                                                                                                                    |
| Hurst & Phillips, 1931              | 2.8 mm/day           | atmometer                                   | Giza                                                                                                                                                |
| Hurst & Phillips, 1931              | 5.4 mm/day           | atmometer                                   | Helwan                                                                                                                                              |
| Hurst & Phillips, 1931              | 4.2 mm/day           | atmometer                                   | Tor                                                                                                                                                 |
| Hurst & Phillips, 1931              | 4.1 mm/day           | atmometer                                   | Qasr el-Gebali                                                                                                                                      |
| Hurst & Phillips, 1931              | 3.3 mm/day           | atmometer                                   | Minya                                                                                                                                               |
| Hurst & Phillips, 1931              | 7.5 mm/day           | atmometer                                   | Aswan                                                                                                                                               |
| Hurst & Phillips, 1931              | 8.6 mm/day           | atmometer                                   | Atbara oasis                                                                                                                                        |
| Hurst & Phillips, 1931              | 4.9 mm/day           | atmometer                                   | Port Sudan oasis                                                                                                                                    |
| Hurst & Phillips, 1931              | 7.5 mm/day           | atmometer                                   | Kartoum                                                                                                                                             |
| Hurst & Phillips, 1931              | 5.4 mm/day           | atmometer                                   | Kassala                                                                                                                                             |
| Hurst & Phillips, 1931              | 5.1 mm/day           | atmometer                                   | Gallabat                                                                                                                                            |
| Hurst & Phillips, 1931              | 6.5 mm/day           | atmometer                                   | Wad Medani                                                                                                                                          |
| Hurst & Phillips, 1931              | 5.3 mm/day           | atmometer                                   | Roseires                                                                                                                                            |
| Hurst & Phillips, 1931              | 6.9 mm/day           | atmometer                                   | Dueim                                                                                                                                               |
| Hurst & Phillips, 1931              | 6.7 mm/day           | atmometer                                   | El-Obeid                                                                                                                                            |
| Hurst & Phillips, 1931              | 5.8 mm/day           | atmometer                                   | El Fasher                                                                                                                                           |
| Hurst & Phillips, 1931              | 4.5 mm/day           | atmometer                                   | Malakal                                                                                                                                             |
| Hurst & Phillips, 1931              | 3.7 mm/day           | atmometer                                   | Wau                                                                                                                                                 |
| Hurst & Phillips, 1931              | 3.0 mm/day           | atmometer                                   | Mongalla                                                                                                                                            |
| Hurst & Phillips, 1931              | 3.6 mm/day           | lake water balance                          | Lake Victoria                                                                                                                                       |
| Hurst & Phillips, 1931              | 2.2 mm/day           | atmometer                                   | Quarahiya                                                                                                                                           |
| Hurst & Phillips, 1931, Shahn, 1985 | 4.5, 5.5, 7.9 mm/day | atmometer, Penman, Hargreaves               | The Nile near Assiut                                                                                                                                |

|                                            |                                              |                                                                                           |                                                                                                    |
|--------------------------------------------|----------------------------------------------|-------------------------------------------------------------------------------------------|----------------------------------------------------------------------------------------------------|
| Hurst & Philips, 1931, Shahin, 1985        | 7.9 mm/day                                   | atmometer                                                                                 | Wadi-Halfa oasis                                                                                   |
| Hurst & Philips, 1931, Shahin, 1985        | 8.4 mm/day                                   | atmometer                                                                                 | Merol oasis                                                                                        |
| Hurst & Philips, 1931, Shahin, 1985        | 3.0-3.5 mm/day                               | atmometer                                                                                 | Lake Tana                                                                                          |
| Hurst, 1952                                | 2.3 mm/day                                   | atmometer                                                                                 | Nile Delta                                                                                         |
| Hurst, 1952                                | 2.8 mm/day                                   | atmometer                                                                                 | Cairo and neighbourhood                                                                            |
| Hurst, 1952                                | 4.0 mm/day                                   | atmometer                                                                                 | Fayum                                                                                              |
| Hurst, 1952                                | 4.5 mm/day                                   | atmometer                                                                                 | Upper Egypt                                                                                        |
| Hurst, 1952                                | 7.8 mm/day                                   | atmometer                                                                                 | Kartoum                                                                                            |
| Hurst, 1952                                | 3.9 mm/day                                   | atmometer                                                                                 | Lake Albert                                                                                        |
| Hurst, 1952                                | 3.9 mm/day                                   | atmometer                                                                                 | Lake Edward                                                                                        |
| Hurst, 1952                                | 3.8 mm/day                                   | lake water balance                                                                        | Lake Victoria                                                                                      |
| Keig <i>et al.</i> , 1979                  | 1545 (SD 186) mm/yr                          | Penman Evaporation                                                                        | 17 stations in Papua New Guinea, based on data from US Class A pan evaporimeters; Papua New Guinea |
| Knox & Nordenson, undated, from Wood, 1978 | 883000 m2                                    | water balance                                                                             | West Canada Lake                                                                                   |
| Kobayashi, 1973                            | 1099, 964, 1062, 982, 1468, 1326, 1399 mm/yr | Pan, Penman, Fitzpatrick, Swinbank                                                        | open water evaporation for Tateno, Japan                                                           |
| Kobayashi, 1973                            | 1319, 1510, 1976, 1906 mm/yr                 | Pan, Penman, Fitzpatrick, Swinbank                                                        | open water evaporation for Pleiku, Vietnam                                                         |
| Kobayashi, 1973                            | 1997, 1915, 2296, 2186 mm/yr                 | Pan, Penman, Fitzpatrick, Swinbank                                                        | open water evaporation for Qui-Nhon Vietnam                                                        |
| Kobayashi, 1973                            | 1660, 1589, 2045, 1957 mm/yr                 | Pan, Penman, Fitzpatrick, Swinbank                                                        | open water evaporation for Lien-Khuong, Dalat, Vietnam                                             |
| Kobayashi, 1973                            | 1778, 1968, 2372, 2267 mm/yr                 | Pan, Penman, Fitzpatrick, Swinbank                                                        | open water evaporation for Saigon, Tansonnhut, Vietnam                                             |
| Kohler, Nordenson & Baker, 1959            | 33 inches                                    | n/a                                                                                       | average annual lake evaporation                                                                    |
| Kotwicki & Clark, 1991                     | 1899 mm/yr                                   | field measurements from lake surface                                                      | arid climate lake; Lake Eyre, Australia                                                            |
| Kotoda & Mizuyama, 1984                    | 700-800 mm/yr                                | heat balance, aerodynamic method                                                          | Lake Biwa, in the centre of Honshu Island                                                          |
| Krishnamurthy & Ibrahim, 1973              | 3.65-4.5 mm/day                              | lake water balance                                                                        | Lake Victoria                                                                                      |
| Kullus, 1973                               | 570 mm/yr                                    | lake water balance                                                                        | Lake Peipsi-Pihkva, Estonia                                                                        |
| Lacznia <i>et al.</i> , 1999               | 8.6 feet                                     | Walker and Eakin (1963)                                                                   | Peterson Reservoir, Ash Meadows Area, Nye County, Nevada                                           |
| Lapworth, 1965                             | 662 mm/yr                                    | n/a                                                                                       | reservoir near London                                                                              |
| Liu & Kotoda, 1998                         | 786.3 mm/yr                                  | Kotoda 1986 and Advection-Aridity (Brutsaert and Stricket, 1979) models, eddy correlation | water surface, NW China, middle part of Hexi corridor                                              |

|                                      |                           |                                                                     |                                                                                                                           |
|--------------------------------------|---------------------------|---------------------------------------------------------------------|---------------------------------------------------------------------------------------------------------------------------|
| Marsh & Bigrass, 1988<br>Marsh, 1991 | 339, 388 mm/yr            | Priestley-Taylor, micrometeorological,<br>lake water balance, model | NRC lake, Mackenzie Delta                                                                                                 |
| Meyer, 1942                          | 14-100 inches per<br>year | n/a                                                                 | mean annual evaporation from shallow<br>lakes and reservoirs, computed from 50<br>years of weather bureau records for USA |
| Morton, 1983                         | 691, 712 mm/yr            | water budget                                                        | Last Mountain Lake, Saskatchewan,<br>Canada                                                                               |
| Morton, 1983                         | 673 mm/yr                 | CRLE model                                                          | Dauphin Lake                                                                                                              |
| Morton, 1983                         | 1580 mm/yr                | CRLE model                                                          | Lake Victoria                                                                                                             |
| Morton, 1983                         | 720 mm/yr                 | CRLE model                                                          | Last Mountain Lake, Saskatchewan,<br>Canada                                                                               |
| Morton, 1983                         | 1805 mm/yr                | CRLE model                                                          | Salton Sea                                                                                                                |
| Morton, 1983                         | 740 mm/yr                 | CRLE model                                                          | Lake Ontario                                                                                                              |
| Morton, 1983                         | 2022 mm/yr                | CRLE model                                                          | Silver Lake                                                                                                               |
| Morton, 1983                         | 1195 mm/yr                | CRLE model                                                          | Utah Lake                                                                                                                 |
| Morton, 1983                         | 1245 mm/yr                | CRLE model                                                          | Lake Hefner                                                                                                               |
| Morton, 1983                         | 1290 mm/yr                | CRLE model                                                          | Winnemucca Lake                                                                                                           |
| Morton, 1983                         | 1280 mm/yr                | CRLE model                                                          | Pyramid Lake                                                                                                              |
| Movahed-Danech, 1973                 | 1382, 1394 mm/yr          | from lake surface                                                   | Lac de Rezeieh, northwest Iran                                                                                            |
| Nehaichik, 1973                      | 420 mm/yr                 | assume lake water balance                                           | Lake Ilmen, Russia                                                                                                        |
| Nehaichik, 1973                      | 490 mm/yr                 | assume lake water balance                                           | Lake Khanka, China / Russia                                                                                               |
| Nehaichik, 1973                      | 710 mm/yr                 | assume lake water balance                                           | Lake Kulundinskoye, Russia                                                                                                |
| Nijssen & Lettenmaier,<br>2002       | 599, 585, 617 mm/yr       | water balance                                                       | White Gull Creek Basin, England                                                                                           |
| Omar & El Bakry, 1981                | 2689 mm/yr                | water balance                                                       | Lake Nasser, Egypt                                                                                                        |
| Prata, 1989                          | 2190 +/- 100 mm           | Remote Sensing                                                      | arid climate lake                                                                                                         |
| Richter, 1985                        | 633-843 mm/yr             | evaporation pans, empirical relations                               | Lake Stechlin                                                                                                             |
| Richter, 1973                        | 712 mm/yr                 | energy balance method                                               | Lake Murtitz, Germany                                                                                                     |
| Riehl, 1979                          | 280 cm/yr                 | n/a                                                                 | annual evaporation loss for Lake Nasser,<br>in Egypt                                                                      |
| Sacks <i>et al.</i> , 1994           | 151 cm/yr                 | energy budget                                                       | Lake Barco in North Central Florida                                                                                       |
| Sacks <i>et al.</i> , 1994           | 128 cm/yr                 | energy budget                                                       | Lake Five-O in Florida Pan Handle                                                                                         |
| Shahin, 1985                         | 6.6 mm/day                | pan conversion                                                      | Lake Victoria at Kisumu                                                                                                   |

|              |                       |                                |                                                      |
|--------------|-----------------------|--------------------------------|------------------------------------------------------|
| Shahin, 1985 | 3.4 mm/day            | pan conversion                 | Lake Victoria                                        |
| Shahin, 1985 | 5.4, 6.3, 9.0 mm/day  | Penman, Hargreaves, Piche      | Malakal                                              |
| Shahin, 1985 | 5.8, 6.2, 7.6 mm/day  | Penman, Hargreaves, Piche      | Wau                                                  |
| Shahin, 1985 | 5.5, 5.0, 7.0 mm/day  | Penman, Hargreaves, Piche      | Mongalla, Juba                                       |
| Shahin, 1985 | 8.04 mm/day           | pan, Panman, Piche, Kohler     | The Nile at Khartoum                                 |
| Shahin, 1985 | 4.3 mm/day            | pan, Panman, Piche, Kohler     | The Nile at Gambeila                                 |
| Shahin, 1985 | 5.3 mm/day            | pan, Panman, Piche, Kohler     | The Nile at Akobo                                    |
| Shahin, 1985 | 5.0, 7.1 mm/day       | pan, Panman, Piche, Kohler     | The Nile near Addis Abbaba                           |
| Shahin, 1985 | 6.3, 7.9 mm/day       | pan, Panman, Piche, Kohler     | The Nile near Roseires                               |
| Shahin, 1985 | 7.0, 9.2 mm/day       | pan, Panman, Piche, Kohler     | The Nile near Wad Medani                             |
| Shahin, 1985 | 7.0 mm/day            | pan, Panman, Piche, Kohler     | The Nile near Singa                                  |
| Shahin, 1985 | 7.4 mm/day            | pan, Panman, Piche, Kohler     | The Nile near Sennar                                 |
| Shahin, 1985 | 5.3 mm/day            | pan, Panman, Piche, Kohler     | The Nile near Kurmuk                                 |
| Shahin, 1985 | 8.0 mm/day            | pan, Panman, Piche, Kohler     | The Nile near Atbara                                 |
| Shahin, 1985 | 5.8, 8.7, 7.7 mm/day  | pan, Panman, Piche, Hargreaves | The Nile at Qena                                     |
| Shahin, 1985 | 6.1, 8.6, 14.7 mm/day | pan, Panman, Piche, Hargreaves | open water at Kharga oasis                           |
| Shahin, 1985 | 4.9, 7.0, 9.8 mm/day  | pan, Panman, Piche, Hargreaves | the Nile near Almaza (airport)                       |
| Shahin, 1985 | 5.2, 6.7, 9.3 mm/day  | pan, Panman, Piche, Hargreaves | Suez Canal                                           |
| Shahin, 1985 | 4.4, 6.2, 3.7 mm/day  | pan, Panman, Piche, Hargreaves | the Nile near Zagazig                                |
| Shahin, 1985 | 3.8, 5.3, 4.5 mm/day  | pan, Panman, Piche, Hargreaves | the Nile near Tanta                                  |
| Shahin, 1985 | 4.0, 4.2, 5.1 mm/day  | pan, Panman, Piche, Hargreaves | the Nile near Edfina                                 |
| Shahin, 1985 | 4.6, 4.0, 8.0 mm/day  | pan, Panman, Piche, Hargreaves | the Nile near Port Said (airport)                    |
| Shahin, 1985 | 4.4, 4.0, 5.0 mm/day  | pan, Panman, Piche, Hargreaves | the Nile near Alexandria                             |
| Shahin, 1985 | 4.9, 4.7, 7.9 mm/day  | pan, Panman, Piche, Hargreaves | the Nile near Sallum (observatory)                   |
| Shahin, 1985 | 2033 mm/yr            | Penman                         | open water evaporation for Shambe in the Sudd region |
| Shahin, 1985 | 4.7, 3.8, 7.8 mm/day  | pan, Panman, Piche, Hargreaves | the Nile near El Kasr                                |
| Shahin, 1985 | 4.5, 4.2, 4.6 mm/day  | pan, Panman, Piche, Hargreaves | the Nile near El Sirw                                |

|                                                           |                              |                                                                 |                                                                                                   |
|-----------------------------------------------------------|------------------------------|-----------------------------------------------------------------|---------------------------------------------------------------------------------------------------|
| Shahin, 1985                                              | 4.3, 5.2, 7.7 mm/day         | pan, Panman, Piche, Hargreaves                                  | the Nile near El Tahrir                                                                           |
| Shnitnikov, 1973                                          | 970 mm/yr                    | n/a                                                             | Lake Aral, desert location                                                                        |
| Shnitnikov, 1973                                          | 950-1047 mm/yr               | n/a                                                             | Lake Balkhash, arid steppe , semi-desert                                                          |
| Shnitnikov, 1973                                          | 702 mm/yr                    | n/a                                                             | Lake Issyk-kul, intermountain location                                                            |
| Solantie, 1973                                            | 390-610 mm/yr                | empirical Dalton formula                                        | Finland                                                                                           |
| Stewart & Rouse, 1976                                     |                              | n/a                                                             |                                                                                                   |
| Tattari & Ikonen, 1997                                    | 400 mm/yr                    | ASTIM model                                                     | for open water surface in Hietajarvi, Finland                                                     |
| Tetzlaff & Adams, 1983                                    | 2150-2640 mm/yr              | water balance                                                   | n/a                                                                                               |
| Tyler <i>et al.</i> , 1997                                | 2.7 (SD 0.68) mm/day         | eddy correlation, microlysimeters                               | seasonally adjusted evaporation rate for open water at Owens Lake, California                     |
| Unland <i>et al.</i> , 1998                               | 1.705 m/yr                   | micrometeorological measurements, Bowen Ratio-Energy Balance    | open water surfaces                                                                               |
| USGS, 1958<br>Morton, 1983                                | 1855-2163 mm/yr              | energy budget, CRLE model                                       | Lake Mead on the Colorado River                                                                   |
| Vali-Khodjeini, 1991<br>Patkovich, 1986                   | 745 mm/yr                    | water budget                                                    | Caspian Sea                                                                                       |
| Prival'skii, 1981 ;<br>Shiklomanov &<br>Geogievskii, 1981 |                              |                                                                 |                                                                                                   |
| Van Dijk <i>et al.</i> , 2001                             | 1300 mm/yr                   | water balance, micrometeorological measurements, literature     | open water in Ciumutuk river catchment, West Java, Indonesia                                      |
| Vallet-Coulomb <i>et al.</i> , 2001                       | 1780, 1870, 1730, 1740 mm/yr | lake energy balance, Penman method, CRLE model, chloride budget | Lake Ziway, Ethiopia                                                                              |
| Verburg & Hecky, 2002                                     | 115-173 W/m <sup>2</sup> /yr | energy balance                                                  | poster at AGU, for Lake Tanganyika in Central Africa (between Tanzania and Congo), Energy balance |
| Visher & Hughes, 1978                                     | 120 cm/yr                    | n/a                                                             | Florida Lakes                                                                                     |
| Zamanov, 1973                                             | 300 mm/yr                    | lake water balance                                              | Great Alagel Lake                                                                                 |
| Zubenok, 1976                                             | 160 cm/yr                    | energy balance                                                  | 30°N to 30°S                                                                                      |
| Zubenok, 1976                                             | 100 cm/yr                    | energy balance                                                  | 30-60 degrees latitude, potential ET                                                              |

Table S1.5. Annual evapotranspiration of grazing areas ( $ET_{gz}$ )

| Source      | ET            | Method                                                   | Description                    |
|-------------|---------------|----------------------------------------------------------|--------------------------------|
| Allen, 2000 | 870-940 mm/yr | using FAO56-PM equation and the 1985 Hargreaves equation | pasture in Gediz River, Turkey |

|                                             |                                                   |                                                                                          |                                                                                                                                                                                                            |
|---------------------------------------------|---------------------------------------------------|------------------------------------------------------------------------------------------|------------------------------------------------------------------------------------------------------------------------------------------------------------------------------------------------------------|
| Beijaars & Bosveld, 1997                    | 523 mm/yr                                         | micrometeorological measurements, tower                                                  | grass plot at Cabauw, Netherlands                                                                                                                                                                          |
| Ben Wu et al., 2001                         | 482.7 mm/yr                                       | water balance                                                                            | originally grassland, after grazing now is covered with woody vegetation: Ashe, redberry juniper, live oak, vasey shin oak, and herbaceous plants; - Cusenbary Draw Basin 209 km <sup>2</sup> ,            |
| Bethune & Wang, 2004                        | 1230 mm/yr                                        | lysimeter, model                                                                         | irrigated pasture                                                                                                                                                                                          |
| Billesbach <i>et al.</i> , 2002             | 550-680 mm/yr                                     | Bowen Ratio - Energy Balance, micrometeorological measurements                           | temperate grasslands, savannas, and shrublands; range for dry valley (550 mm/yr) to wet meadow (680 mm/yr), for Nebraska Sand Hills; free-range grazing.                                                   |
| Calder, 2003                                | 460, 486 mm/yr                                    | HYLUC model                                                                              | Greenwood Community Forest, grassland in sandy & loam soil                                                                                                                                                 |
| Choudhury & DiGirolamo, 1998<br>Delfs, 1967 | 520 mm/yr                                         | n/a                                                                                      | Harz Mountain                                                                                                                                                                                              |
| Clarke & Newson, 1978                       | 421 mm/yr                                         | water budget                                                                             | Wye catchment in England, rough hill pasture                                                                                                                                                               |
| Clifton & Taylor, 1994                      | 395, 435, 525 mm/yr                               | n/a                                                                                      | annual and perennial pastures with medium cutting height                                                                                                                                                   |
| Cox & Pitman, 2002                          | 752, 755, 826, 800, 785, 872, 878, 877, 870 mm/yr | water balance                                                                            | different pasture and slope treatments                                                                                                                                                                     |
| Dirnbock & Grabner, 2000                    | 180-270 mm/yr                                     | compilation of literature, modelling according to Turc-Wendling, an energy balance model | alpine pastures in Austrian alps                                                                                                                                                                           |
| Dunin, 1965                                 | 440 mm/yr                                         | catchment water balance                                                                  | pasture in Parwan Creek, Australia                                                                                                                                                                         |
| Dunn & Mackay, 1995                         | 475 (SD 26.4) mm/yr                               | model based on Penman-Monteith with Rutter interception                                  | pasture, rough grazing and grassland in the Tyne Basin in northeast England                                                                                                                                |
| Greenwood <i>et al.</i> , 1985              | 390 mm/yr                                         | ventilated chamber technique                                                             | pasture in North Bannister, Western Australia                                                                                                                                                              |
| Harr & Price, 1972                          | 21-25 cm/yr                                       | soil water balance                                                                       | two greasewood-cheatgrass communities in south central Washington; heavily grazed prior to 1943, grazed intermittently from 1943-1960, and ungrazed since 1960; study area located near Rattlesnake Spring |
| Hibbert, 1971                               | 510 mm/yr                                         | catchment water balance                                                                  | pasture in Three Bar (B) catchment                                                                                                                                                                         |
| Hibbert, 1971                               | 456 mm/yr                                         | catchment water balance                                                                  | pasture in Three Bar (C) catchment                                                                                                                                                                         |
| Hicks et al., 2001                          | 1027 mm/yr                                        | micrometeorological measurements                                                         | Kaitaia Airfield meteorological site, from meteorological data collected                                                                                                                                   |
| Hodnett <i>et al.</i> , 1995                | 1.2 mm/day                                        | soil water balance                                                                       | pasture                                                                                                                                                                                                    |



|                               |                |                                                      |                                                                                                                                                                                                                                              |
|-------------------------------|----------------|------------------------------------------------------|----------------------------------------------------------------------------------------------------------------------------------------------------------------------------------------------------------------------------------------------|
| Hoffman & Jackson, 2000       | 987 mm/yr      | simulated with NCAR CCM3 general circulation model   | for Cerrado, converted savannah to grassland, using GCM                                                                                                                                                                                      |
| Hoffman & Jackson, 2000       | 1023 mm/yr     | simulated with NCAR CCM3 general circulation model   | for Llanos, converted savannah to grassland, using GCM                                                                                                                                                                                       |
| Hoffman & Jackson, 2000       | 823 mm/yr      | simulated with NCAR CCM3 general circulation model   | for Northern Africa, converted savannah to grassland, using GCM                                                                                                                                                                              |
| Hoffman & Jackson, 2000       | 804 mm/yr      | simulated with NCAR CCM3 general circulation model   | for Southern Africa, converted savannah to grassland, using GCM                                                                                                                                                                              |
| Hoffman & Jackson, 2000       | 719 mm/yr      | simulated with NCAR CCM3 general circulation model   | for Australia, converted savannah to grassland, using GCM                                                                                                                                                                                    |
| Hoover, 1944                  | 878 mm/yr      | catchment water balance                              | pasture in Coweeta (17) catchment, NC                                                                                                                                                                                                        |
| Hoyt & Troxell, 1934          | 477 mm/yr      | catchment water balance                              | pasture in San Gabriel catchment                                                                                                                                                                                                             |
| Hudson & Gilman, 1993         | 471 mm/yr      | catchment water balance                              | sheep pasture in grassland Wye catchment, Plynlimon Mid Wales                                                                                                                                                                                |
| Jipp <i>et al.</i> , 1998     | 3.76 mm/day    | micrometeorological measurements, soil water balance | pasture in a cattle ranch 6 km north of Paragominas in northern Brazilian state of Para; pastures originally cleared in the 1960s; invasive weedy vegetation is controlled with manual clearing and burning                                  |
| Joffre & Rambal, 1993         | 400-590        | soil water balance, Penman Monteith                  | Dehesa ecosystems savanna, grassland                                                                                                                                                                                                         |
| Jolly <i>et al.</i> , 1997    | 589 mm/yr      | catchment water balance                              | pasture in Border catchment in Murray-Darling basin, Australia                                                                                                                                                                               |
| Jolly <i>et al.</i> , 1997    | 703 mm/yr      | catchment water balance                              | pasture in Dumarasq catchment in Murray-Darling basin, Australia                                                                                                                                                                             |
| Jolly <i>et al.</i> , 1997    | 697 mm/yr      | catchment water balance                              | pasture in Gwyder 1 catchment in Murray-Darling basin, Australia                                                                                                                                                                             |
| Jolly <i>et al.</i> , 1997    | 669 mm/yr      | catchment water balance                              | pasture in Gwyder 2 catchment in Murray-Darling basin, Australia                                                                                                                                                                             |
| Jolly <i>et al.</i> , 1997    | 628 mm/yr      | catchment water balance                              | pasture in Jugiong Creek catchment in Murray-Darling basin, Australia                                                                                                                                                                        |
| Jolly <i>et al.</i> , 1997    | 667 mm/yr      | catchment water balance                              | pasture in Mehi catchment in Murray-Darling basin, Australia                                                                                                                                                                                 |
| Jolly <i>et al.</i> , 1997    | 585 mm/yr      | catchment water balance                              | pasture in Wallumburrawang Creek catchment in Murray-Darling basin, Australia                                                                                                                                                                |
| Leopoldo <i>et al.</i> , 1993 | 2.1-3.8 mm/day | n/a                                                  | pasture in ABRACOS project near Manaus                                                                                                                                                                                                       |
| Leppanen, 1980                | 377 mm/yr      | Bowen Ratio-Energy Balance                           | flood plain that had been cleared of all tall vegetation by chaining, raking and burning about 6 months before measurements began; groundcover is sparse volunteer Bermuda grass and scattered seep willow; Gila River Valley, AZ; 1971-1972 |

|                              |                                    |                                                              |                                                                                                                                                                  |
|------------------------------|------------------------------------|--------------------------------------------------------------|------------------------------------------------------------------------------------------------------------------------------------------------------------------|
| Leppanen, 1981               | 989 mm/yr                          | Bowen Ratio-Energy Balance                                   | planted forage grass; original cover of halophytic vegetation, consisting largely of seepweed, and iodine bush, and salt cedar; Gila River Valley, AZ; 1969-1970 |
| Lewis <i>et al.</i> , 2000   | 368 mm/yr (SD 89)                  | catchment water balance                                      | partially harvested and grazed oak forest watershed in California; oak trees removed from 14% of land area                                                       |
| Lodge <i>et al.</i> , 2002   | 589 mm/yr                          | evaporation dome                                             | native pastures (89% of annual rainfall)                                                                                                                         |
| Lodge <i>et al.</i> , 2001   | 514, 587, 572, 552, 637, 625 mm/yr | biophysical model                                            | different pasture and grazing treatments                                                                                                                         |
| Malek <i>et al.</i> , 1990   | 638 mm/yr                          | Bowen Ratio-Energy Balance, micrometeorological measurements | for Ranch in the middle of western, grass and shrub-covered margin of the playa                                                                                  |
| Moerlen <i>et al.</i> , 1999 | 373.42 mm/yr                       | catchment water balance, Penman Monteith                     | 25 km northwest of Cork, agricultural grassland, pasture and meadow, perennial ryegrass                                                                          |
| Molchanov, 1973              | 300-370 mm/yr                      | water balance                                                | meadow and clover                                                                                                                                                |
| Molchanov, 1973              | 375-400 mm/yr                      | water balance                                                | meadows in Sareevo (in Vologda district)                                                                                                                         |
| Morton, 1971                 | 568 mm/yr                          | catchment water balance                                      | pasture in Ausable catchment                                                                                                                                     |
| Morton, 1971                 | 464 mm/yr                          | catchment water balance                                      | pasture in Pembina catchment                                                                                                                                     |
| Morton, 1971                 | 356 mm/yr                          | catchment water balance                                      | pasture in Wascana catchment                                                                                                                                     |
| Morton, 1971                 | 578 mm/yr                          | catchment water balance                                      | pasture in West Humber catchment                                                                                                                                 |
| Morton, 1971                 | 388 mm/yr                          | catchment water balance                                      | pasture in Yorkton catchment                                                                                                                                     |
| Morton, 1971                 | 409 mm/yr                          | catchment water balance                                      | pasture in Ribstone catchment                                                                                                                                    |
| Morton, 1971                 | 333 mm/yr                          | catchment water balance                                      | pasture in Swift Current catchment                                                                                                                               |
| Morton, 1971                 | 573 mm/yr                          | catchment water balance                                      | pasture in Fish catchment                                                                                                                                        |
| Morton, 1971                 | 610 mm/yr                          | catchment water balance                                      | pasture in Lynn catchment                                                                                                                                        |
| Morton, 1983a                | 516 mm/yr                          | catchment water balance                                      | pasture in Castor watershed, Canada                                                                                                                              |
| Morton, 1994                 | 437 mm/yr                          | catchment water balance                                      | Pasture in Whitemud watershed, Canada                                                                                                                            |
| Morton, 1994                 | 392 mm/yr                          | catchment water balance                                      | pasture in Magnusson watershed, Canada                                                                                                                           |
| Murphy <i>et al.</i> , 2004  | 607, 641 mm/yr                     | evaporation dome                                             | for continuous and rotational grazing                                                                                                                            |
| Nanni, 1970                  | 750 mm/yr                          | catchment water balance                                      | pasture in Cathedral catchment                                                                                                                                   |
| Ni-Lar-Win, 1994             | 454 mm/yr                          | catchment water balance                                      | pasture in Molenbeek 43 catchment                                                                                                                                |
| Ni-Lar-Win, 1994             | 510 mm/yr                          | catchment water balance                                      | pasture in Molenbeek 44 catchment                                                                                                                                |
| Ni-Lar-Win, 1994             | 598 mm/yr                          | catchment water balance                                      | pasture in Mark catchment                                                                                                                                        |

|                                |                          |                                        |                                                                                                                |
|--------------------------------|--------------------------|----------------------------------------|----------------------------------------------------------------------------------------------------------------|
| Ni-Lar-Win, 1994               | 480 mm/yr                | catchment water balance                | pasture in Ede catchment                                                                                       |
| Ni-Lar-Win, 1994               | 522 mm/yr                | catchment water balance                | pasture in Gr. Molenbeek catchment                                                                             |
| Ni-Lar-Win, 1994               | 459 mm/yr                | catchment water balance                | pasture in Grote Nete catchment                                                                                |
| Ni-Lar-Win, 1994               | 545 mm/yr                | catchment water balance                | pasture in Demer catchment                                                                                     |
| Ni-Lar-Win, 1994               | 572 mm/yr                | catchment water balance                | pasture in Gete catchment                                                                                      |
| Ni-Lar-Win, 1994               | 617 mm/yr                | catchment water balance                | pasture in Grote Gete catchment                                                                                |
| Ni-Lar-Win, 1994               | 495 mm/yr                | catchment water balance                | pasture in Mandel catchment                                                                                    |
| Ni-Lar-Win, 1994               | 641 mm/yr                | catchment water balance                | pasture in Yin catchment                                                                                       |
| Nouvellon <i>et al.</i> , 2000 | 289, 341, 459 mm/yr      | soil water budget                      | Kendall site in Walnut Gulch experimental watershed                                                            |
| Novick <i>et al.</i> , 2004    | 568 mm/yr                | eddy covariance                        | grass-covered field, burned and mowed for hay                                                                  |
| Olivier, 1961                  | 1517 mm/yr               | Olivier method                         | Malakal, Sudan, grass                                                                                          |
| Paz <i>et al.</i> , 1996       | 510 mm/yr                | soil water balance                     | Gayoso-Castro farm in Castro de Ribeira de Lea (Lugo Province), Spain, grazed by sheep                         |
| Ridley <i>et al.</i> , 1997    | 642, 619, 606 mm/yr      | water balance                          | for phalaris, cocksfoot and ryegrass pastures                                                                  |
| Roberts, 1998                  | 329, 487, 240, 334 mm/yr | empirical relations from other studies | grazing land in England                                                                                        |
| Rosset <i>et al.</i> , 2001    | 410 mm/yr                | n/a                                    | wet grassland in Swiss pre-alpine region, between 1273 and 1628 m above sea level, grazed and mown once a year |
| Scott & Sudmeyer, 1993         | 339 mm/yr                | ventilated chamber technique           | two perennial pastures (lucerne and phalaris) at a site near Collie in the southwest of Western Australia.     |
| Sims, Singh & Laurenroth, 1978 | 200, 158 mm/yr           | water balance                          | ALE (Washington) site, Northwest bunchgrass                                                                    |
| Sims, Singh & Laurenroth, 1978 | 400 mm/yr                | water balance                          | Bison (Montana) site, mountain grassland; moderate grazing intensity                                           |
| Sims, Singh & Laurenroth, 1978 | 570, 280 mm/yr           | water balance                          | Bridger (Montana) site, mountain grassland                                                                     |
| Sims, Singh & Laurenroth, 1978 | 400, 620, 420 mm/yr      | water balance                          | Cottonwood (South Dakota) site; mixed prairie; heavy grazing intensity                                         |
| Sims, Singh & Laurenroth, 1978 | 460 mm/yr                | water balance                          | Dickinson (North Dakota) site; mixed prairie; heavy grazing intensity                                          |
| Sims, Singh & Laurenroth, 1978 | 450 mm/yr                | water balance                          | Hays (Kansas) site; mixed prairie; moderate grazing intensity                                                  |

|                                  |                           |                         |                                                                                                                                                                                                                   |
|----------------------------------|---------------------------|-------------------------|-------------------------------------------------------------------------------------------------------------------------------------------------------------------------------------------------------------------|
| Sims, Singh & Laurenroth, 1978   | 166, 200, 350 mm/yr       | water balance           | Jornada (New Mexico) site; desert grassland; lightly grazed                                                                                                                                                       |
| Sims, Singh & Laurenroth, 1978   | 500, 729, 670 mm/yr       | water balance           | Osage (Oklahoma) site; Tallgrass prairie; moderate grazing intensity                                                                                                                                              |
| Sims, Singh & Laurenroth, 1978   | 250, 600, 400 mm/yr       | water balance           | Pantex (Texas) site; Shortgrass prairie; moderate grazing intensity                                                                                                                                               |
| Sims, Singh & Laurenroth, 1978   | 250, 270, 320 mm/yr       | water balance           | Pawnee (Colorado) site; Shortgrass prairie; moderate grazing intensity                                                                                                                                            |
| Shih & Snyder, 1985              | 1281-1424 mm/yr           | n/a                     | Pasture                                                                                                                                                                                                           |
| Silberteijn <i>et al.</i> , 1999 | 757 mm/yr                 | model                   | Wights catchment, within Collie River catchment, in southwest of Western Australia                                                                                                                                |
| Simpson <i>et al.</i> , 1998     | 659 mm/yr                 | soil water budget       | wallaby grass, subterranean clover pasture at Tamworth                                                                                                                                                            |
| Swift & Swank, 1980              | 1011 mm/yr                | catchment water balance | pasture in Coweeta (13) catchment, NC                                                                                                                                                                             |
| Vertessy, 1999                   | 582 mm/yr                 | n/a                     | grasslands / pastures in south-eastern Australia                                                                                                                                                                  |
| Waterloo <i>et al.</i> , 1999    | 746 mm/yr                 | n/a                     | Fiji, converted from forest 100 years ago                                                                                                                                                                         |
| Waterloo <i>et al.</i> , 1999    | 860-980 mm/yr             | n/a                     | typical grassland catchment in Fiji                                                                                                                                                                               |
| Weltz & Blackburn, 1995          | 566-606 mm/yr             | lysimeter               | Prosopis – Acacia – Andropogon-Setaria Savannah; La Copita Research Area, eastern Rio Grande plain of Texas                                                                                                       |
| Wohlfahrt <i>et al.</i> , 2004   | 477.2, 490.4, 452.8 mm/yr | eddy covariance         | this is a hay meadow - it is cut between two and three times a year, the hay is then used to feed the cows during winter when they're in the stable; cows graze at high elevation sites during summer             |
| Wu <i>et al.</i> , 2001          | 482.7 mm/yr               | water balance model     | originally grassland, after grazing now is covered with woody vegetation: Ashe, redberry juniper, live oak, vasey shin oak, and herbaceous plants; Cusenbary Draw Basin 209 km <sup>2</sup> , Edwards Plateau, TX |
| Xu, 1992                         | 774 mm/yr                 | catchment water balance | pasture in Leie catchment                                                                                                                                                                                         |
| Zubenok, 1976                    | 300-350 mm/yr             | n/a                     | treeless plains within the northern taiga subzone in Russia                                                                                                                                                       |
| Zubenok, 1976                    | 500-550 mm/yr             | n/a                     | treeless plains in the mixed forests and forest steppe zones of European former USSR                                                                                                                              |
| Zubenok, 1976                    | 475 (range 450-500 mm/yr) | n/a                     | treeless areas in the southern taiga subzone of the European former USSR; this estimate is supported by numerous water-balance investigations                                                                     |

Table S1.6. Annual evapotranspiration of Burned Areas

| Source                      | ET               | Method                                             | Description                                                                                                                                                    |
|-----------------------------|------------------|----------------------------------------------------|----------------------------------------------------------------------------------------------------------------------------------------------------------------|
| Klinge <i>et al.</i> , 2001 | 97,147,147 mm/yr | soil water model, micrometeorological measurements | for cleared and burned rainforest in eastern Amazonia                                                                                                          |
| Santos <i>et al.</i> , 2003 | 861.9 mm         | eddy covariance                                    | campo sujo savannah in central Brazil                                                                                                                          |
| Sumner, 2001                | 993 mm/yr        | energy budget variation of eddy correlation        | Tiger Bay watershed Volusia County, Florida, natural fires on pine flatwood uplands and cypress wetlands; ET increased after burning, logging followed burning |

Table S1.7. Annual evapotranspiration of tree plantations ( $ET_{tp}$ )

| Source                      | ET                     | Method                                                   | Description                                                                                                                                                                                 |
|-----------------------------|------------------------|----------------------------------------------------------|---------------------------------------------------------------------------------------------------------------------------------------------------------------------------------------------|
| Bailly <i>et al.</i> , 1974 | 1610 mm/yr             | soil water balance                                       | Manankazo, Madagascar, pinus patula plantation, 4-10 yrs                                                                                                                                    |
| Blackie, 1979               | 1160 mm/yr             | catchment water balance                                  | Kimakia, Kenya, Pinus Patula plantation., 10-16 yrs                                                                                                                                         |
| Bruijnzeel, 1988            | 1070 mm/yr             | catchment water balance                                  | 11-35 year old plantation forest of Agathis dammara Warb in central Java                                                                                                                    |
| Bruijnzeel, 1988            | 900 mm/yr              | water balance                                            | 29 year old plantation, Pinus merkussi plantation, Genteng, West Java                                                                                                                       |
| Bubb & Croton, 2002         | 1082-1124 mm/yr        | catchment water balance                                  | exotic pine plantation in previously mixed area                                                                                                                                             |
| Buttle & Metcalfe, 2000     | 358-525 mm/yr          | catchment water balance                                  | partially clear-cut forests; total area is about 40,000 km <sup>2</sup> . obtained from residual of water balance; for six watersheds in Ontario; equal to average of 6 watersheds (441 mm) |
| Calder, 1992                | 3400 mm/yr             | n/a                                                      | young Eucalyptus forests, 8 m deep soils                                                                                                                                                    |
| Cornish & Vertessy, 2001    | 1100 mm/yr (SD 78)     | catchment water balance                                  | 8 different catchments in Karuah Research Area, of Eucalypt forests in New South Wales, Australia                                                                                           |
| Dunin & Aston, 1984         | 766-933 mm/yr          | model: corroborated by weighing lysimeter data           | Eucalypt regrowth in Kioloa State Forest in Australia.                                                                                                                                      |
| Dunn & Mackay, 1995         | 338 (SD = 16.0) mm/yr  | model, based on Penman-Monteith with Rutter interception | felled forest in the Tyne Basin in North East England                                                                                                                                       |
| El-Nokrashy, 1963           | 1121.10, 1085.80 mm/yr | n/a                                                      | citrus trees in Delta Barrage, Egypt                                                                                                                                                        |
| Ewel & Gholz, 1991          | 74-111 cm/yr           | simulated ET                                             | pine plantation range from dry to wet year                                                                                                                                                  |

|                                |                                                                      |                                                                                 |                                                                                                                                                                                                                                                                  |
|--------------------------------|----------------------------------------------------------------------|---------------------------------------------------------------------------------|------------------------------------------------------------------------------------------------------------------------------------------------------------------------------------------------------------------------------------------------------------------|
| Gholz & Clark, 2002            | 959, 951, 1110<br>mm/yr                                              | eddy covariance                                                                 | along chronosequence of slash pine plantation in Florida: recent clear-cut, mid-rotation, and 24-yr old rotation stand                                                                                                                                           |
| Greenwood <i>et al.</i> , 1985 | 2300, 2700 mm/yr                                                     | Vapour Compression (VC)                                                         | for young Eucalyptus plantation, 3 sites,                                                                                                                                                                                                                        |
| Holscher <i>et al.</i> , 1997  | 1364 mm/yr                                                           | micrometeorological measurements                                                | plot in a 2.5 year old plot in Eastern Amazonia.                                                                                                                                                                                                                 |
| Jaeger & Kessler, 1997         | 622 mm/yr                                                            | micrometeorological measurements, water balance                                 | 33 year old pine plantation in upper Rhine watershed, Southern Germany, subject to thinning                                                                                                                                                                      |
| Jordan & Fischer, 1977         | 38.3+2.4 in/yr                                                       | "hydrologic means"                                                              | Turpentine Run, St. Thomas Virgin Islands                                                                                                                                                                                                                        |
| Klinge <i>et al.</i> , 2001    | 130.333                                                              | soil water balance, model, Pman                                                 | Federal Cacao Research Institute, for tropical lowland rainforest, ET for forests year of and year after clearcutting                                                                                                                                            |
| Krestovsky, 1969b              | 530, 580, 540, 570<br>mm/yr                                          | n/a                                                                             | 40 & 60 year old pine and spruce forest in southern taiga subzone of European former USSR                                                                                                                                                                        |
| Krestovsky, 1969b              | 310, 350, 445, 550,<br>590 mm/yr                                     | n/a                                                                             | 5, 10, 20, 40, 60 year old deciduous forest in southern taiga subzone of European former USSR                                                                                                                                                                    |
| Krestovsky, 1980               | 305-380 mm/yr                                                        | n/a                                                                             | regrowth areas, aged 1-5 and 10-15 years, in the southern taiga subzone in the European former USSR                                                                                                                                                              |
| Lane <i>et al.</i> , 2004      | 1118, 1150, 969,<br>1024 mm/yr                                       | soil water balance                                                              | Eucalyptus plantation, south-eastern China                                                                                                                                                                                                                       |
| Law, 1957                      | 711 mm                                                               | lysimeter                                                                       | 0.045 ha plantation of Sitka spruce in Hodder catchment,                                                                                                                                                                                                         |
| Le Maitre & Versfeld, 1997     | 1180.9, 1031.0,<br>1176.5, 941.2,<br>1133.0, 1119.0,<br>1108.1 mm/yr | water balance, meteorological data                                              | catchments afforested with <i>Pinus patula</i> and <i>Pinus radiata</i> ; each number represents a different catchment                                                                                                                                           |
| Liu <i>et al.</i> , 1998       | 795 (+/- 20) mm/yr                                                   | ET model with micrometeorological measurements, eddy correlation, class A pans, | pine plantations in industrial forest lands of the Georgia-Pacific Corporation 15 km NE of Gainesville FL                                                                                                                                                        |
| Löfgren, 2004a,b               | 520, 531, 552, 570,<br>544, 629 mm/yr                                | micrometeorological measurements                                                | Station SE04 - Gardsjon, Norway Spruce Forest. Probably grazed woodland for centuries before clear-felling 1900-1910 and subsequent forest tree planting and thinning (1968). Grazing was suspended around 1950. In 1980 roughly a half hectare was clear-felled |
| Löfgren, 2004a,b               | 400, 452, 453, 522,<br>471, 537 mm/yr                                | micrometeorological measurements                                                | Station SE14 Aneboda, Norway Spruce. Grazed woodland for centuries. Probably clear-felled in the 1860's, then abandoned and overgrown. Grazing suspended in the 1930's. Light thinning in the 1940's and in 1950.                                                |

|                                  |                          |                                                                                                                                                                                         |                                                                                                                                        |
|----------------------------------|--------------------------|-----------------------------------------------------------------------------------------------------------------------------------------------------------------------------------------|----------------------------------------------------------------------------------------------------------------------------------------|
| McMahon <i>et al.</i> , 1996     | 871, 794, 682, 650 mm/yr | model                                                                                                                                                                                   | Eucalyptus globulus research plots, long-term mean climate factors, derived from Esoclim model, planted 1983, at Esperance (sites 1-4) |
| McMahon <i>et al.</i> , 1996     | 1627 mm/yr               | model                                                                                                                                                                                   | Eucalyptus globulus research plots, long-term mean climate factors, derived from Esoclim model, planted 1984, at Darkan                |
| McMahon <i>et al.</i> , 1996     | 1247 mm/yr               | model                                                                                                                                                                                   | Eucalyptus globulus research plots, long-term mean climate factors, derived from Esoclim model, planted 1984, at Manjimup              |
| McMahon <i>et al.</i> , 1996     | 1262 mm/yr               | model                                                                                                                                                                                   | Eucalyptus globulus research plots, long-term mean climate factors, derived from Esoclim model, planted 1986, at Northcliffe           |
| McMahon <i>et al.</i> , 1996     | 962 mm/yr                | model                                                                                                                                                                                   | Eucalyptus globulus research plots, long-term mean climate factors, derived from Esoclim model, planted 1990 at Forcett                |
| Moran & O'Shaughnessy, 1984      | 1189 mm/yr               | catchment water balance                                                                                                                                                                 | 34 year old Eucalypt tree plantation forest in Monda 1-3 catchments, Australia                                                         |
| Murai, 1980<br>Tsukamoto, 1992   | 532 mm/yr                | water balance                                                                                                                                                                           | New Cypress Plantation                                                                                                                 |
| Murakami <i>et al.</i> , 2000    | 389 mm/yr (SD 75.4)      | catchment water balance                                                                                                                                                                 | immature Japanese cypress and cedar forests                                                                                            |
| Nijssen & Lettenmaier, 2002      | 279, 287, 292 mm/yr      | extrapolation of eddy correlation and bowen ratio methods to basin using Penman-Monteith combination equation and Leaf Area Index (LAI) weighted versions of multiple regression models | medium-age regeneration conifer forest in the White Gull Creek Basin, Saskatchewan, Canada.                                            |
| Nijssen & Lettenmaier, 2002      | 212, 226, 229 mm/yr      | extrapolation of eddy correlation and bowen ratio methods to basin using Penman-Monteith combination equation and LAI weighted versions of multiple regression models                   | new regeneration conifer forest in the White Gull Creek Basin, Saskatchewan, Canada.                                                   |
| Nijssen & Lettenmaier, 2002      | 345, 360, 381 mm/yr      | extrapolation of eddy correlation and bowen ratio methods to basin using Penman-Monteith combination equation and LAI weighted versions of multiple regression models                   | medium-age regeneration deciduous forest in the White Gull Creek Basin, Saskatchewan, Canada.                                          |
| Nijssen & Lettenmaier, 2003_____ | 337, 356, 376 mm/yr      | extrapolation of eddy correlation and bowen ratio methods to basin using Penman-Monteith combination equation and LAI weighted versions of multiple regression models                   | new regeneration deciduous forest in the White Gull Creek Basin, Saskatchewan, Canada.                                                 |
| Pilgrim <i>et al.</i> , 1982     | 655 mm/yr                | catchment water balance                                                                                                                                                                 | pine plantation                                                                                                                        |
| Pudjiharta, 1986a                | 1655, 1978 mm/yr         | lysimeter                                                                                                                                                                               | Ciwidey West Java, Pinus merkusii plantation, 1-8 year, 9-17 year                                                                      |

|                                                           |                         |                                                                     |                                                                                                                                                                                                            |
|-----------------------------------------------------------|-------------------------|---------------------------------------------------------------------|------------------------------------------------------------------------------------------------------------------------------------------------------------------------------------------------------------|
| Richardson, 1982                                          | 2000 mm/yr              | catchment water balance                                             | Pinus caribaea plantation, 18 yrs, Blue Mountains, Jamaica (leaky catchment)                                                                                                                               |
| Richardson, 1982                                          | 1849, 1365, 485 mm/yr   | catchment water balance                                             | 19 year old stand of pinus caribaea in Jamaica; comparison of the water balance of two but predominantly impermeable catchments, one covered with pine plantation, the other with lower montane rainforest |
| Riekerk, 1985                                             | 77-118 cm/yr            | n/a                                                                 | watersheds dominated by pine plantations in north Florida                                                                                                                                                  |
| Rosenzweig, 1968                                          | log 3.09 mm/yr          | Thornthwaite method                                                 | secondary tropical forest, Kade, Ghana                                                                                                                                                                     |
| Running <i>et al.</i> , 1989                              | 35-39 cm/yr             | simulation model (FOREST-BGC)                                       | predominantly coniferous forests in western Montana, the part of the study area that was heavily clearcut                                                                                                  |
| Rutter, 1964                                              | 1.02 mm/yr              | soil water balance                                                  | plantation of Pinus sulvestris at Crowthorne Berks.                                                                                                                                                        |
| Schafer <i>et al.</i> , 2002                              | 537.1, 575, 614.3 mm/yr | sap flux, hydrological balance, eddy covariance                     | Duke Forest Loblolly pine plantation (15 yr old)                                                                                                                                                           |
| Shahin, 1959                                              | 977.79-964.45 mm/yr     | n/a                                                                 | Citrus trees in Giza, Egypt                                                                                                                                                                                |
| Shahin, 1985                                              | 1215 mm/yr              | micrometeorological, Doorenbos & Pruitt 1977 method                 | citrus trees for Cairo, Egypt                                                                                                                                                                              |
| Shimizu <i>et al.</i> , 2003                              | 902, 875 mm/yr          | eddy covariance and water balance                                   | Kahoku experimental watershed, cypress plantation                                                                                                                                                          |
| Sommer <i>et al.</i> , 2002                               | 1421 mm/yr              | Bowen Ratio-Energy Balance                                          | secondary woody vegetation in Brazilian Amazon - a 3.5 year old vegetation                                                                                                                                 |
| Sun <i>et al.</i> , 1998                                  | 901 mm/yr               | model                                                               | typical flatwoods sites : Gator National Forest, and Bradford Forest                                                                                                                                       |
| Sun <i>et al.</i> , 2002                                  | 1077 (SD 98) mm/yr      | water balance                                                       | 140 ha Florida watershed - unmanaged mature cypress-plantation                                                                                                                                             |
| Sun <i>et al.</i> , 2002                                  | 1054 (SD 96) mm/yr      | water balance                                                       | mature loblolly pine plantation in coastal North Carolina                                                                                                                                                  |
| Thornton <i>et al.</i> , 2002<br>Law <i>et al.</i> , 2002 | 0.686, 0.664 m/yr       | coupled water-carbon-nitrogen model, canopy-scale flux observations | Blodgett forest, California; clearcut 1990                                                                                                                                                                 |
| Thornton <i>et al.</i> , 2002; Law <i>et al.</i> , 2002   | 0.528, 0.482 m/yr       | coupled water-carbon-nitrogen model, canopy-scale flux observations | Duke Forest, North Carolina, 1983 clear cut                                                                                                                                                                |
| Thornton <i>et al.</i> , 2002; Law <i>et al.</i> , 2002   | 0.988 m/yr              | coupled water-carbon-nitrogen model, canopy-scale flux observations | slash pine plantation, Gainesville, Florida, clearcut 1990                                                                                                                                                 |



|                               |                                    |                                                                                        |                                                                                                                                                      |
|-------------------------------|------------------------------------|----------------------------------------------------------------------------------------|------------------------------------------------------------------------------------------------------------------------------------------------------|
| Tiktak & Bouten, 1994         | 712 mm/yr                          | micrometeorological measurements model                                                 | stand 29 years old at 1988; last thinning carried out 5 years before measurements                                                                    |
| Van Dijk <i>et al.</i> , 2001 | 1250 mm/yr                         | water balance, micrometeorological measurements, literature                            | for <i>Paraserianthes</i> plantation in Cikumutuk river catchment,                                                                                   |
| Vertessy <i>et al.</i> , 1996 | 798 mm/yr                          | ecohydrological water balance model (Topog-IRM)                                        | mountain ash Picaninny (0.53 km <sup>2</sup> ) forest catchment, Victoria, Australia; clear-felled and seeded with mountain ash                      |
| Vertessy <i>et al.</i> , 1998 | 1220, 1280, 1340 mm/yr             | Sapwood Area Index (SAI), microlysimeter, humidity dome, stemflow                      | 15, 30 and 60 year old mountain ash forest in Maroonda Catchments, New South Wales, Australia                                                        |
| Vertessy <i>et al.</i> , 2001 | 1371 mm/yr                         | Sapwood Area Index (SAI), lysimeter                                                    | 15-year old ash / eucalyptus forest in Victoria, Australia                                                                                           |
| Vorosmarty & Wilmott, 1996    | 1194, 1210, 1260, 1263, 1180 mm/yr | Water Balance/Water Transport Model (WBM/WTM) computed water balance                   | Amazon basin, upriver of Obidos, Brazil; water-year begins in September                                                                              |
| Waterloo <i>et al.</i> , 1999 | 1926, 1717 mm/yr                   | micrometeorological measurements, Temperature Variance-Energy Balance (TVEB)           | 6 and 15 year old <i>pinus caribaea</i> plantations on former grassland soils under maritime tropical conditions; from model, former grassland soils |
| Waterloo, 1994                | 1772 mm/yr                         | n/a                                                                                    | vigorously growing young pine plantation in Fiji                                                                                                     |
| Whitehead & Kelliher, 1991    | 796-997 mm/yr                      | Penman-Monteith, catchment water balance, soil water balance, Rainfall Index (RI), RAU | 11-year old <i>pinus radiata</i> stand before and after thinning, at Longmile Rotorua, New Zealand                                                   |
| Wilson <i>et al.</i> , 2000   | 1340 MJ/m <sup>2</sup>             | eddy covariance                                                                        | mixed deciduous stand over 50 years old, having regenerated from agricultural land; temperate deciduous forest in Oak Ridge TN                       |
| Yunusa <i>et al.</i> , 2010   | 303, 564, 753 mm/yr                | Catchment water balance method                                                         | 2-year-old juvenile plantation block of mixed woody species near a waste management site, Australia                                                  |
| Yunusa <i>et al.</i> , 2010   | 207, 393, 565 mm/yr                | Catchment water balance method                                                         | Newly planted block of mixed tree species near a waste management site, Australia                                                                    |
| Yunusa <i>et al.</i> , 2010   | 278, 461, 722 mm/yr                | Catchment water balance method                                                         | Grassy pasture seeded in 1994, near a waste management site, Australia                                                                               |
| Yunusa <i>et al.</i> , 2010   | 271, 579, 762 mm/yr                | Catchment water balance method                                                         | Mature woodland near a waste management site, Australia                                                                                              |

|             |           |                    |                                                               |
|-------------|-----------|--------------------|---------------------------------------------------------------|
| Zakia, 1987 | 615 mm/yr | soil water balance | Minas Gerais, Brazil, Pinus caribaea plantations, 4-6 yrs     |
| Zakia, 1987 | 785 mm/yr | soil water balance | Minas Gerais, Brazil, eucalyptus grandis plantations, 4-6 yrs |

Table S1.8. Annual evapotranspiration of evergreen broadleaf forest area

| Source                                 | ET         | Method                                          | Description                                                                                                                                               |
|----------------------------------------|------------|-------------------------------------------------|-----------------------------------------------------------------------------------------------------------------------------------------------------------|
| Abdul Rahim & Baharuddin, 1986         | 1555 mm/yr | catchment water balance                         | lowland and hilldipterocarp rain forests on granitic substrates in Peninsular Malaysia                                                                    |
| Amin <i>et al.</i> , 1997              | 1523 mm/yr | weather data satellite imagery                  | one watershed for one year in a tropical rainforest in Malaysia; Trolak watershed, in the north-east part of the Bernam River basin in the state of Perak |
| Baconguis, 1980                        | 1232 mm/yr | water balance for a watertight area of 3.8 ha   | Angat, Philippines, lowland rain forest; dipterocarp rain forest                                                                                          |
| Bailly <i>et al.</i> , 1974            | 1295 mm/yr | water balance for 101 ha basin                  | Perinet, Madagascar; montane seasonal forest                                                                                                              |
| Bastiaanssen & Bandara, 2001           | 1312 mm/yr | energy balance                                  | mountain forest in Kirindi Oya, Sri Lanka                                                                                                                 |
| Balini <i>et al.</i> , 1980            | 910 mm/yr  | forests in Wungong Brook catchment, Australia   |                                                                                                                                                           |
| Baumgartner & Reichel, 1975            | 1185 mm/yr | catchment water budget                          | Amazon basin                                                                                                                                              |
| Bernhard-Reversat <i>et al.</i> , 1978 | 1425 mm/yr | n/a                                             | rainforest in Yapo                                                                                                                                        |
| Bernhard-Reversat <i>et al.</i> , 1978 | 1196 mm/yr | n/a                                             | rainforest in Banco (valley)                                                                                                                              |
| Bernhard-Reversat <i>et al.</i> , 1978 | 1145 mm/yr | n/a                                             | rainforest in Vanco (plateau)                                                                                                                             |
| Blackie, 1979a                         | 1337 mm/yr | water balance for 544 ha Lagan catchment        | Kericho, Kenya, montane rainforest                                                                                                                        |
| Blackie, 1979a                         | 1240 mm/yr | water balance for 186 ha Sambret headwater area | Kericho, Kenya, Montane rain forest plus bamboo                                                                                                           |
| Blackie, 1979b                         | 1156 mm/yr | water balance for 65.9 ha catchment             | Kimakia Kenya, Montane rain forest dominated by bamboo                                                                                                    |
| Bosch & Hewlett, 1982                  | 1016 mm/yr | catchment water balance                         | mixed hardwoods in Coweeta (6) catchment, NC                                                                                                              |

|                                              |                 |                                                                         |                                                                                                                                                                                                                                                                 |
|----------------------------------------------|-----------------|-------------------------------------------------------------------------|-----------------------------------------------------------------------------------------------------------------------------------------------------------------------------------------------------------------------------------------------------------------|
| Bowden, 1968                                 | 1090 mm/yr      | converted from pan estimate                                             | six stations in St. Croix, Virgin Islands, utilizing all available historical rainfall, temperature, and pan-evaporation data                                                                                                                                   |
| Bruijnzeel & Proctor, 1995                   | 1265 mm/yr      | catchment and site water balance studies                                | equatorial lower montane forest with negligible fog incidence                                                                                                                                                                                                   |
| Bruijnzeel & Proctor, 1995                   | 310-390 mm/yr   | catchment and site water balance studies                                | upper montane cloud forest with high fog incidence                                                                                                                                                                                                              |
| Bruijnzeel & Proctor, 1995; Steinhardt, 1979 | 980 mm/yr       | energy balance                                                          | lower montane cloud forest with moderate fog incidence; tall forest in Venezuela                                                                                                                                                                                |
| Bruijnzeel & Veneklaas, 1998                 | 450-700 mm/yr   | n/a                                                                     | tropical montane cloud forest                                                                                                                                                                                                                                   |
| Bruijnzeel <i>et al.</i> , 1993              | 695 mm/yr       | site water balance                                                      | for a stunted lower montane forest on a coastal mountain; may be a transition to low-elevation upper montane cloud forest on the basis of its mossiness and low stature                                                                                         |
| Bruijnzeel, 1999                             | 275-1380 mm/yr  | n/a                                                                     | for Tropical Montane Cloud Forests; the frequent presence of clouds reduces ET, further reducing potential water stress; range for dwarf cloud forests, to cloud-free lower montane rainforest; estimates based on indirect estimate; Bruijnzeel cautions again |
| Bruijnzeel <i>et al.</i> , 1993              | 695 mm/yr       | short-term site water budget measurements conducted during a dry period | stunted lower montane forest on a coastal mountain in East Malaysia, may be a transition to low-elevation upper montane cloud forest                                                                                                                            |
| Calder <i>et al.</i> , 1986                  | 1481 mm/yr      | Penman-Monteith model                                                   | mature secondary rainforest in Janlappa, West Java, Indonesia                                                                                                                                                                                                   |
| Calvo, 1986                                  | 366 mm/yr       | water balance for 4740 ha basin (water tight)                           | cloud forest, Rio Macho, Costa Rica                                                                                                                                                                                                                             |
| Cheng <i>et al.</i> , 2002                   | 1039-1195 mm/yr | catchment water balance                                                 | LHC-3 and LHC-5 catchment in Taiwan; dense forests of mixed evergreen hardwood species                                                                                                                                                                          |
| Cheng <i>et al.</i> , 2002                   | 1539 mm/yr      | catchment water balance                                                 | Fu-Shan No 1 watershed                                                                                                                                                                                                                                          |
| Choudhury & DeGirolamo, 1998                 | 1191 mm/yr      | biophysical process-based model with satellite & ancillary data         | rainforest                                                                                                                                                                                                                                                      |
| Choudhury & DeGirolamo, 1998                 | 1200 mm/yr      | biophysical process-based model with satellite & ancillary data         | rainforest                                                                                                                                                                                                                                                      |

|                                  |                      |                                                    |                                                                                                        |
|----------------------------------|----------------------|----------------------------------------------------|--------------------------------------------------------------------------------------------------------|
| Collinet <i>et al.</i> , 1984    | 1465 mm/yr           | water balance for 120 ha basin                     | Tai 1, Ivory Coast; moist semi-deciduous forest                                                        |
| Collinet <i>et al.</i> , 1984    | 1363 mm/yr           | water balance for 140 ha basin                     | Tai 2, Ivory Coast; moist semi-deciduous forest                                                        |
| Cornish & Vertessy, 2001         | 1075 mm/yr (SD 67.3) | catchment water balance                            | 8 different catchments in Karuah Research Area, of Eucalypt forests in New South Wales, Australia      |
| Cornish, 1993                    | 1190 mm/yr           | catchment water balance                            | Eucalypt forest in Crabapple catchment, Karuah in central New South Wales                              |
| Costa & Foley, 1997              | 3.7 mm/day           | land surface model                                 | Amazon basin                                                                                           |
| Costa & Foley, 1999              | 1384 mm/yr (SD 60.3) | n/a                                                | Amazon basin                                                                                           |
| de los Santos, 1981              | 392 mm/yr            | water balance for 7.2 ha basin                     | mossy montane cloud rain forest; Mt. Data, Philippines                                                 |
| DID, 1986                        | 1498 mm/yr           | water balance for 56 ha basin                      | Dipterocarp rain forest, basin "C"; Sungai Tekam C, Malaya                                             |
| DID, 1986                        | 1606 mm/yr           | water balance for 38 ha basin                      | Dipterocarp rain forest, basin "B"; Sungai Tekam B, Malaya                                             |
| Dietrich <i>et al.</i> , 1982    | 1440 mm/yr           | water balance for 10-ha basin                      | mature semi-deciduous moist tropical forest, Barro Colorado, Panama                                    |
| Dietrich <i>et al.</i> , 1982    | 886 mm/yr            | water balance for 10-ha basin                      | dry year in mature semi-deciduous moist tropical forest, Barro Colorado, Panama                        |
| Edwards, 1979                    | 1381 mm/yr           | water balance for 16.3 ha catchment                | montane evergreen forest (67%), scrub and grasses (33%); Mbeya, Tanzania                               |
| Elsenbeer <i>et al.</i> , 1994   | 1535 mm/yr           | n/a                                                | Western Amazonia, Peru                                                                                 |
| Eltahir & Bras, 1994             | 3.1 mm/day           | ECMWF assimilated data                             | Amazon basin                                                                                           |
| Feller, 1981                     | 620 mm/yr            | catchment water balance                            | south Australia higher elevation mountain ash catchment                                                |
| Focan & Fripiat, 1953            | 1433 mm/yr           | site water balance, tensiometers for soil moisture | secondary seasonal evergreen forest; Yangambi, Congo                                                   |
| Foster, 2001<br>Bruijnzeel, 1999 | 275-1380 mm/yr       | based on indirect evidence                         | Tropical Montane Cloud Forests; range for dwarf cloud forests, to cloud-free lower mountain rainforest |
| Frangi & Lugo, 1985              | 845 mm/yr            | site water balance (catchment leaking)             | alluvial palm forest within lower montane forest in Luquillo experimental forest                       |

|                                     |                |                                      |                                                                                                          |
|-------------------------------------|----------------|--------------------------------------|----------------------------------------------------------------------------------------------------------|
| Frank & Inouye, 1994                | 1363 mm/yr     | model (Thornthwaite)                 | wet tropical forest, Lambarene, Gabon                                                                    |
| Frank & Inouye, 1994                | 1363 mm/yr     | model (Thornthwaite)                 | wet tropical forest, Makokou, Gabon                                                                      |
| Frank & Inouye, 1994                | 1363 mm/yr     | model (Thornthwaite)                 | wet tropical forest, Warri, Nigeria                                                                      |
| Frank & Inouye, 1994                | 1363 mm/yr     | model (Thornthwaite)                 | wet tropical forest, Gasco, Philippine                                                                   |
| Frank & Inouye, 1994                | 1363 mm/yr     | model (Thornthwaite)                 | wet tropical forest, Malacca, Malaysi                                                                    |
| Frank & Inouye, 1994                | 1363 mm/yr     | model (Thornthwaite)                 | wet tropical forest, Sandakan, Malays                                                                    |
| Frank & Inouye, 1994                | 1363 mm/yr     | model (Thornthwaite)                 | wet tropical forest, Zamboanga, Phili                                                                    |
| Frank & Inouye, 1994                | 1363 mm/yr     | model (Thornthwaite)                 | wet tropical forest, Iquitos, Peru                                                                       |
| Frank & Inouye, 1994                | 1363 mm/yr     | model (Thornthwaite)                 | wet tropical forest, Manaus, Brazil,                                                                     |
| Frank & Inouye, 1994                | 1363 mm/yr     | model (Thornthwaite)                 | wet tropical forest, Zanderj, Surinam                                                                    |
| Franken & Leopoldo, 1984            | 1641 mm/yr     | catchment water balance              | annual water budget for Amazon basin                                                                     |
| Friend & Cox, 1995                  | 3.12 mm/day    | coupled SCM-vegetation model         | forest                                                                                                   |
| Garcia-Martino <i>et al.</i> , 1996 | 1707 mm/yr     | GIS, catchment water balance         | the entire elevation range in the Luquillo experimental forest in Puerto Rico                            |
| Gatewood <i>et al.</i> , 1950       | 1.829 m/yr     | water budget                         | lower Gila River valley, annual cottonwood water use estimates (riparian); Lower Safford Valley, Arizona |
| Gilmour, 1975; 1977                 | 1420 mm/yr     | water balance for 25.7 ha            | South Creek, Babinda, Queensland, Australia; mesophyll vine rainforest                                   |
| Gonggrijp, 1941b                    | 1170 mm/yr     | water balance for 19.2 ha basin      | lower montane rain forest, Ciwidey, Indonesia                                                            |
| Hafkenscheid, 2000                  | 890-1050 mm/yr | micro-meteorological measurements    | Blue Mountains of Jamaica                                                                                |
| Hermann 1970                        | 1265 mm/yr     | water balance for "small catchments" | Sierra Nevada, Colombia, lower montane rain forest                                                       |
| Hermann 1970                        | 308 mm/yr      | water balance for "small catchments" | Sierra Nevada, Colombia, cloud forest                                                                    |
| Hewlett & Hibbert, 1961             | 793 mm/yr      | catchment water balance              | mixed hardwoods in Coweeta (22) catchment, NC                                                            |
| Hewlett & Hibbert, 1961             | 1019 mm/yr     | catchment water balance              | mixed hardwoods in Coweeta (2) catchment, NC                                                             |
| Hodnett <i>et al.</i> , 1995        | 3.5 mm/day     | soil water balance                   | near Manaus Brazil                                                                                       |

|                                                    |                |                                                                                                               |                                                                                                                          |
|----------------------------------------------------|----------------|---------------------------------------------------------------------------------------------------------------|--------------------------------------------------------------------------------------------------------------------------|
| Holwerda, 1997<br>Schellekens <i>et al.</i> , 1998 | 435 mm/yr      | micro-meteorological measurements                                                                             | low elevation dwarf cloud forest in Puerto Rico                                                                          |
| Hoover, 1944                                       | 1059 mm/yr     | catchment water balance                                                                                       | mixed hardwoods in Coweeta (17) catchment, NC                                                                            |
| Hsia & Lin, 1981                                   | 850-1200 mm/yr | n/a                                                                                                           | forested watersheds in Taiwan                                                                                            |
| Hutjes <i>et al.</i> , 1990                        | 1415 mm/yr     | model                                                                                                         | Tai, Ivory Coast                                                                                                         |
| Hutley <i>et al.</i> , 1997                        | 1260 mm/yr     | soil water budget                                                                                             | tall lower montane forest subject to frequent, low intensity rainfall associated with low cloud in Queensland, Australia |
| Huttel, 1975                                       | 1145 mm/yr     | site water balance, ET derived from soil water balance (neutron probe), and from ET Turc minus E <sub>i</sub> | moist semi-deciduous forest; Banco 1 basin, Ivory Coast; located on hill crest; dry year                                 |
| Huttel, 1975                                       | 1195 mm/yr     | site water balance, ET derived from soil water balance (neutron probe), and from ET Turc minus E <sub>i</sub> | moist semi-deciduous forest; Banco 2 basin, Ivory Coast; located on valley bottom                                        |
| Huttel, 1975                                       | 1425 mm/yr     | site water balance, ET derived from soil water balance (neutron probe), and from ET Turc minus E <sub>i</sub> | moist semi-deciduous forest; Yapo basin, Ivory Coast, located on hill crest                                              |
| Jetten, 1994                                       | 1485 mm/yr     | water balance                                                                                                 | Guyana                                                                                                                   |
| Jipp <i>et al.</i> , 1998                          | 4.15 mm/day    | soil water balance, micrometeorological measurements                                                          | mature rainforest 6 km north of Paragominas in the northern Brazilian state of Para                                      |
| Johnson & Kovner, 1956                             | 779 mm/yr      | catchment water balance                                                                                       | mixed hardwoods in Coweeta (19) catchment, NC                                                                            |
| Johnson & Kovner, 1956                             | 1207 mm/yr     | catchment water balance                                                                                       | mixed hardwoods in Coweeta (3) catchment, NC                                                                             |
| Jolly <i>et al.</i> , 1997                         | 683 mm/yr      | catchment water balance                                                                                       | forests in Castlereagh catchment in Murray-Darling basin, Australia                                                      |
| Jolly <i>et al.</i> , 1997                         | 939 mm/yr      | catchment water balance                                                                                       | forests in Goodradigbee catchment in Murray-Darling basin, Australia                                                     |
| Jolly <i>et al.</i> , 1997                         | 879 mm/yr      | catchment water balance                                                                                       | forests in Mitta catchment in Murray-Darling basin, Australia                                                            |
| Jolly <i>et al.</i> , 1997                         | 701 mm/yr      | catchment water balance                                                                                       | forests in Murrumbidgee 18 catchment in Murray-Darling basin, Australia                                                  |
| Jolly <i>et al.</i> , 1997                         | 714 mm/yr      | catchment water balance                                                                                       | forests in Murrumbidgee 21 catchment in Murray-Darling basin, Australia                                                  |

|                                |                                 |                                                                                                                                 |                                                                                                                          |
|--------------------------------|---------------------------------|---------------------------------------------------------------------------------------------------------------------------------|--------------------------------------------------------------------------------------------------------------------------|
| Jolly <i>et al.</i> , 1997     | 696 mm/yr                       | catchment water balance                                                                                                         | forests in Namoi 8 catchment in Murray-Darling basin, Australia                                                          |
| Jordan & Heuvelodop, 1981      | 1904 mm/yr                      | catchment water balance                                                                                                         | for tropical rain forest                                                                                                 |
| Jordan, 1989                   | 1778 mm/yr                      | n/a                                                                                                                             | rainforest in San Calos                                                                                                  |
| Kenworthy, 1969                | 1750 mm/yr                      | water balance                                                                                                                   | dipterocarp rainforest in Ulu Gombak                                                                                     |
| Klinge <i>et al.</i> , 2001    | 1368 (SD 17) mm/yr              | soil water balance, model, Penman                                                                                               | rainforest in eastern Amazonia                                                                                           |
| Kumagai <i>et al.</i> , 2004   | 945.7+357.3 mm/yr               | water cycling model and measured climatic data                                                                                  | tropical rain forest, Lambir Hills National Park, Sarawak, Indonesia                                                     |
| Kumagai <i>et al.</i> , 2004   | 1545 mm/yr                      | eddy covariance                                                                                                                 | tropical rain forest, Lambir Hills National Park, Sarawak, Indonesia                                                     |
| Kuraji, 1996                   | 1450.5 mm/yr                    | catchment water balance                                                                                                         | Sapulut Watershed, East Malaysia                                                                                         |
| Langford <i>et al.</i> , 1982  | 620 mm/yr                       | catchment water balance                                                                                                         | Picaninny catchment mountain ash old growth                                                                              |
| Langford, 1976                 | 610 mm/yr                       | catchment water balance                                                                                                         | Eucalyptus forest in Graceburn catchment, Australia                                                                      |
| Larsen & Concepcion, 1998      | 2134-2337 mm/yr                 | n/a                                                                                                                             | for the entire Rio Mameyes watershed; error at a max is estimated to be 12% (Schellekens <i>et al.</i> , 2000, p. 2191). |
| Ledger, 1975                   | 1146 mm/yr                      | water balance for a 870 ha basin                                                                                                | seasonal evergreen forest; dry season of 5 months; 13% occupied by artificial lake; Guma, Sierra Leone                   |
| Leopoldo <i>et al.</i> , 1981a | 1548 mm/yr                      | catchment water balance for a basin of 2350 ha                                                                                  | Bacio Modelo, Brazil; ET may be too high [Bruijnzeel 1990]                                                               |
| Leopoldo <i>et al.</i> , 1982b | 1675 mm/yr                      | water balance for 130 ha basin; P determined with one gauge; change in soil water storage neglected; probable catchment leakage | "terra-firma" Amazonian primary forest; using catchment water budget technique; Ducke reserve, Brazil                    |
| Leopoldo <i>et al.</i> , 1993  | 2.3-4.6 mm/day                  | n/a                                                                                                                             | mature forest in ABRACOS project near Manaus, Amazonia                                                                   |
| Leopoldo <i>et al.</i> , 1995  | 1493.1 (CV 2.08%) mm/yr         | catchment water balance, modified Penman method                                                                                 | Amazonian rainforest near Manaus                                                                                         |
| Lesack, 1993                   | 1120 mm/yr                      | catchment water budget                                                                                                          | central Amazonian primary forest                                                                                         |
| Lloyd & Marques-Filho, 1988    | 1120 mm/yr (16-25% uncertainty) | water balance for undisturbed rainforest in central Amazon over 1 year                                                          | Central Amazonia, Brazil                                                                                                 |

|                               |            |                                                                   |                                                                                                                                         |
|-------------------------------|------------|-------------------------------------------------------------------|-----------------------------------------------------------------------------------------------------------------------------------------|
| Lockwood, 1976                | 1750 mm/yr | catchment water balance                                           | Sungai Gombak, Malay Peninsula                                                                                                          |
| Low & Goh, 1972               | 1516 mm/yr | water balance for an area of 6810 ha                              | for lowland and hilldipterocarp rain forests on granitic substrates in Peninsular Malaysia; Sungai Lui, Malaya (13% rubber plantations) |
| Major, 1963                   | 1132 mm/yr | model (Thornthwaite)                                              | Calcutta, India, monsoon deciduous forest                                                                                               |
| Major, 1963                   | 1156 mm/yr | model (Thornthwaite)                                              | Rangoon, Myanmar, mangrove forest                                                                                                       |
| Major, 1963                   | 860 mm/yr  | model (Thornthwaite)                                              | Haiti forests                                                                                                                           |
| Major, 1963                   | 774 mm/yr  | model (Thornthwaite)                                              | Bombay forests                                                                                                                          |
| Major, 1963                   | 1665 mm/yr | model (Thornthwaite)                                              | tropical forests near Singapore                                                                                                         |
| Malmer, 1993                  | 1835 mm/yr | n/a                                                               | Sipitang, East Malaysia                                                                                                                 |
| Marengo <i>et al.</i> , 1994  | 1616 mm/yr | annual water budget                                               | Amazon Basin                                                                                                                            |
| Marengo <i>et al.</i> , 2001a | 1581 mm/yr | annual water budget                                               | Amazon Basin                                                                                                                            |
| Marques <i>et al.</i> , 1977  | 1000 mm/yr | micrometeorological measurements, model (Thornthwaite, Penman 48) | Amazon basin, for stretch between Belem and Manaus                                                                                      |
| Marques <i>et al.</i> , 1980  | 1261 mm/yr | micrometeorological measurements, model (Thornthwaite, Penman 48) | annual water budget for Amazon basin                                                                                                    |
| Matsuyama, 1992               | 3.1 mm/day | water balance                                                     | Amazon basin                                                                                                                            |
| Molion, 1975                  | 3.1 mm/day | climatonomical                                                    | Amazon basin                                                                                                                            |
| Moran & O'Shaughnessy, 1984   | 841 mm/yr  | catchment water balance                                           | 34 year old Eucalypt tree plantation forest in Monda 1-3 catchments, Australia                                                          |
| Morton, 1983a                 | 956 mm/yr  | catchment water balance                                           | forests in Sanguere, Cameroon                                                                                                           |
| Morton, 1983a                 | 1328 mm/yr | catchment water balance                                           | forests in Lagan catchment                                                                                                              |
| Morton, 1983a                 | 1291 mm/yr | catchment water balance                                           | forests in Sambret catchment                                                                                                            |
| Ni-Lar-Win, 1994              | 1204 mm/yr | catchment water balance                                           | Niger catchment                                                                                                                         |
| Ni-Lar-Win, 1994              | 1200 mm/yr | catchment water balance                                           | Feredougouba catchment                                                                                                                  |
| Ni-Lar-Win, 1994              | 1127 mm/yr | catchment water balance                                           | Boa catchment                                                                                                                           |



|                              |                        |                                             |                                                                                                                                                                                                          |
|------------------------------|------------------------|---------------------------------------------|----------------------------------------------------------------------------------------------------------------------------------------------------------------------------------------------------------|
| Ni-Lar-Win, 1994             | 1199 mm/yr             | catchment water balance                     | Bafing catchment                                                                                                                                                                                         |
| Ni-Lar-Win, 1994             | 1295 mm/yr             | catchment water balance                     | N'zo catchment                                                                                                                                                                                           |
| Ni-Lar-Win, 1994             | 898 mm/yr              | catchment water balance                     | Falerne catchment                                                                                                                                                                                        |
| Ni-Lar-Win, 1994             | 1483 mm/yr             | catchment water balance                     | Yeni catchment                                                                                                                                                                                           |
| Nizhizawa & Koike, 1992      | 1451 mm/yr             | annual water budget                         | Amazon Basin                                                                                                                                                                                             |
| Odum <i>et al.</i> , 1970b   | 1860-2154 mm/yr        | n/a                                         | Tabonuco forest at El Verde, in the Luquillo Experimental Forest                                                                                                                                         |
| Oki <i>et al.</i> , 1999     | 1023 mm/yr             | annual water budget                         | Amazon Basin                                                                                                                                                                                             |
| Oyebande, 1988               | 945 mm/yr              | n/a( <i>al.</i> , 2007)                     | Loweo Catchment in the Yangambi Forest Reserve in Zaire                                                                                                                                                  |
| Pereira, 1964                | 1154 mm/yr             | catchment water balance                     | bamboo forest in Kimakia catchment                                                                                                                                                                       |
| Pike, 1964                   | 814 mm/yr              | catchment water balance                     | Lilongl catchment                                                                                                                                                                                        |
| Pike, 1964                   | 1107 mm/yr             | catchment water balance                     | Luweya catchment                                                                                                                                                                                         |
| Pike, 1964                   | 807 mm/yr              | catchment water balance                     | Rivi Rivi catchment                                                                                                                                                                                      |
| Pilgrim <i>et al.</i> , 1982 | 600 mm/yr              | catchment water balance                     | native eucalypt forest at Lidsdale, Australia                                                                                                                                                            |
| Pinol <i>et al.</i> , 1991   | 502 mm/yr              | catchment water balance                     | dense holm oak ( <i>Quercus ilex</i> L.) forest in L'Avic catchment, Prades, northeast Spain                                                                                                             |
| Pinol <i>et al.</i> , 1991   | 515 mm/yr              | catchment water balance                     | dense holm oak ( <i>Quercus ilex</i> L.) forests in La Teula catchment, Prades, northeast Spain                                                                                                          |
| Poels, 1987                  | 1630 mm/yr             | catchment water balance for a 295 ha basin; | clearcutting just outside basin; leakage via earthen dam with sharp-rested weir quantified by that via sandy valley bottom assumed negligible, possibly overestimate (Bruijnzeel., 1990); Tonka, Surinam |
| Post & Jones, 2001           | 1825, 1802, 1788 mm/yr | catchment water balance                     | Luquillo Bisley Catchment 1, 2, 3                                                                                                                                                                        |
| Rao <i>et al.</i> , 1996     | 4.5 mm/day             | water balance                               | ECMWF assimilate data, Amazon basin                                                                                                                                                                      |
| Ribeiro & Villa Nova, 1979   | 1508 mm/yr             | Thornthwaite and Mather's method            | Ducke Forest Reserve, Amazonia                                                                                                                                                                           |
| Richardson, 1982             | 2000 mm/yr             | Catchment Water Balance (CWB)               | submontane forest on the leeward side of Jamaica (leaky catchment)                                                                                                                                       |
| Roche, 1982                  | 1528 mm/yr             | catchment water balance for 840 ha basin    | Gregoire 1, French Guyana                                                                                                                                                                                |
| Roche, 1982                  | 1437 mm/yr             | catchment water balance for 1240 ha basin   | Gregoire 2, French Guyana                                                                                                                                                                                |

|                                  |                    |                                                                                                                                                 |                                                                                                                                                                                                             |
|----------------------------------|--------------------|-------------------------------------------------------------------------------------------------------------------------------------------------|-------------------------------------------------------------------------------------------------------------------------------------------------------------------------------------------------------------|
| Roche, 1982                      | 1444 mm/yr         | catchment water balance for 320 ha basin                                                                                                        | Gregoire 3, French Guyana                                                                                                                                                                                   |
| Rosenzweig, 1968                 | log 3.12 mm/yr     | model (Thornthwaite)                                                                                                                            | tropical forest ,Yangambi, Congo (Leopoldville)                                                                                                                                                             |
| Russell & Miller, 1990           | 1620 mm/yr         | annual water budget                                                                                                                             | Amazon Basin                                                                                                                                                                                                |
| Schellekens <i>et al.</i> , 2000 | 6.6-6 mm/day       | micrometeorological measurements, Penman Monteith, catchment water balance                                                                      | for lower tropical rainforest, below 600 m; a recent detailed measurement; 6.6 mm/d in 1996 and 6.0 mm/d in 1997; average ET for forest ; using combination of micrometeorological and hydrological methods |
| Scott & Lesch, 1997              | 1168 mm/yr         | catchment water balance                                                                                                                         | Eucalyptus in Mokobulaan (A) catchment                                                                                                                                                                      |
| Scott & Lesch, 1997              | 1122 mm/yr         | catchment water balance                                                                                                                         | Eucalyptus in Mokobulaan (B) catchment                                                                                                                                                                      |
| Sharma, 1984                     | 923 (+/- 57) mm/yr | water balance method                                                                                                                            | Eucalypt forest in southwestern Australia                                                                                                                                                                   |
| Shuttleworth, 1988               | 1315 mm/yr         | Bowen Ratio Energy Balance (BREB); intensive field campaigns, combined Penman-Monteith-Rutter model using continuous above-canopy climatic data | Manaus rainforest; based on micrometeorology model coupling measurements of available net energy with continuous measurements of rainfall interception loss at Reserva Ducke near Barro Branco catchment    |
| Shuttleworth, 1988               | 1274-1344 mm/yr    | micrometeorological measurements, soil water balance                                                                                            | primary Amazonian rainforest near Manaus                                                                                                                                                                    |
| Silberteiu <i>et al.</i> , 1999  | 1115 mm/yr         | forests in Salmon catchment, within Collie River catchment, in southwest of Western Australia                                                   |                                                                                                                                                                                                             |
| Steinhardt, 1979                 | 980 mm/yr          | energy balance                                                                                                                                  | mossy lower montane rain forest (transition to cloud forest), San Eusebio, Venezuela                                                                                                                        |
| Vertessy & Bessard, 1999         | 678 mm/yr          | n/a                                                                                                                                             | forest in New South Wales                                                                                                                                                                                   |
| Vertessy <i>et al.</i> , 1996    | 635 mm/yr          | ecohydrological water balance model (Topog-IRM)                                                                                                 | mountain ash Picaninny (0.53 km <sup>2</sup> ) forest catchment, Victoria, Australia; old growth mountain ash forest (about 200 years old); doesn't include interception losses                             |
| Vertessy <i>et al.</i> , 2001    | 911 mm/yr          | sap flow, lysimeter                                                                                                                             | 240 yr old Ash / Eucalypt forest in Victoria, Australia                                                                                                                                                     |
| Villa Nova <i>et al.</i> , 1976  | 1168 mm/yr         | micrometeorological measurements                                                                                                                | Amazon basin                                                                                                                                                                                                |
| Villa Nova <i>et al.</i> , 1976  | 1080 mm/yr         | annual water budget                                                                                                                             | Amazon basin                                                                                                                                                                                                |
| Vorosmarty & Wilmott, 1999       | 1221 mm/yr         | Water balance/Water Transport Model (WBM/WTM) computed water balance                                                                            | Amazon basin, upriver of Obidos                                                                                                                                                                             |
| Vorosmarty <i>et al.</i> , 1989  | 1250 mm/yr         | annual water budget                                                                                                                             | Amazon basin                                                                                                                                                                                                |
| Vorosmarty <i>et al.</i> , 1996  | 3.3 mm/d           | model (Thornthwaite)                                                                                                                            | Amazon basin                                                                                                                                                                                                |

|                                |                                          |                                              |                                                                      |
|--------------------------------|------------------------------------------|----------------------------------------------|----------------------------------------------------------------------|
| Vourlitis <i>et al.</i> , 2002 | 6.91(+/- 0.80)<br>MJ/m <sup>2</sup> /day | eddy covariance                              | extensive mature, intact forest, north of Sinop, Mato Grosso, Brazil |
| White <i>et al.</i> , 2002     | 595 mm                                   | Catchment water balance                      | eucalyptus tree belts in pasture area                                |
| Williams <i>et al.</i> , 1998  | 818 mm/yr                                | eddy covariance, soil plant atmosphere model | virgin terra firme forest in Reserva Biologica do Cuieiras           |
| Zeng, 1999                     | 1879 mm/yr                               | catchment water balance                      | annual water budget for Amazon basin                                 |

Table S1.9. Annual evapotranspiration of evergreen needleleaf forest areas

| Source                                   | ET                                             | Method                                            | Description                                                                                                              |
|------------------------------------------|------------------------------------------------|---------------------------------------------------|--------------------------------------------------------------------------------------------------------------------------|
| Amoriello & Constantini, 1999            | 509.3 mm/yr                                    | micrometeorological measurements                  | Spruce Forest, Tarvisio, 08-FRI2-IP                                                                                      |
| Amoriello & Constantini, 1999            | 420.6 mm/yr                                    | micrometeorological measurements                  | Spruce Forest, Passo Lavaze, 17-TRE1-IP                                                                                  |
| Amthor <i>et al.</i> , 2001              | 304 +/- 20%, 278 +/- 22%; 280 +/- 19%<br>mm/yr | nine ecosystem process models                     | 150 year old black spruce forest in central Canada                                                                       |
| Anthoni <i>et al.</i> , 1999             | 430 +/- 70, 400 +/- 60 mm/yr                   | eddy covariance and Penman-Monteith model         | two years, ponderosa pine forest                                                                                         |
| Arkley, 1967                             | 17.1 in/yr                                     | model, assumed soil moisture capacity of 6 inches | Williams, Josephine County, Oregon                                                                                       |
| Barr <i>et al.</i> , 2000                | 390 mm/yr                                      | eddy correlation and deep groundwater piezometer  | boreal aspen forest                                                                                                      |
| Bidlake <i>et al.</i> , 1996             | 1060 mm/yr                                     | Bowen-Ratio Energy Balance                        | pine flatwood in west-central Florida                                                                                    |
| Bosch & Hewlett, 1982                    | 1180 mm/yr                                     | catchment water balance                           | pine forest in Alum Creek (WS2)                                                                                          |
| Bosch & Hewlett, 1982                    | 975 mm/yr                                      | catchment water balance                           | pine forest in Alum Creek (WS3)                                                                                          |
| Brown, 1971<br>Clay <i>et al.</i> , 1974 | 437 mm/yr                                      | catchment water balance                           | Juniper-pinyon forest, Beaver Creek (1) catchment                                                                        |
| Brown, 1971; Clay <i>et al.</i> , 1974   | 439 mm/yr                                      | catchment water balance                           | Juniper-pinyon forest, Beaver Creek (3) catchment                                                                        |
| Calder, 1976                             | 1090 mm/yr                                     | "natural" lysimeter                               | Hafren forest of central Wales, at the headwaters of the River Severn, Plynlimon, Powys; contains 26 Norway Spruce trees |
| Calder, 1982                             | 400 mm/yr                                      | catchment water balance                           | six year average, forest biome                                                                                           |

|                                      |                     |                                                                                          |                                                                                                                                                                                                                                                                                                              |
|--------------------------------------|---------------------|------------------------------------------------------------------------------------------|--------------------------------------------------------------------------------------------------------------------------------------------------------------------------------------------------------------------------------------------------------------------------------------------------------------|
| Calder, 2003                         | 571, 603 mm/yr      | HYLUC model                                                                              | Greenwood Community Forest, conifers in sand & loam soil                                                                                                                                                                                                                                                     |
| Choudhury & DeGirolamo, 1998         | 488 mm/yr           | biophysical process-based model with satellite & ancillary data                          | taiga forests                                                                                                                                                                                                                                                                                                |
| Choudhury & DeGirolamo, 1998         | 460 mm/yr           | biophysical process-based model with satellite & ancillary data                          | taiga forests                                                                                                                                                                                                                                                                                                |
| Choudhury & DeGirolamo, 1998         | 360 mm/yr           | biophysical process-based model with satellite & ancillary data                          | taiga forests                                                                                                                                                                                                                                                                                                |
| Choudhury & DeGirolamo, 1998         | 359 mm/yr           | biophysical process-based model with satellite & ancillary data                          | taiga forests                                                                                                                                                                                                                                                                                                |
| Clarke & McCullogh, 1979             | 717 mm/yr           | 2/3 is coniferous forest, 1/3 Japanese larch                                             |                                                                                                                                                                                                                                                                                                              |
| Delfs, 1967                          | 579 mm/yr           | n/a                                                                                      | spruce forest in Harz Mt.                                                                                                                                                                                                                                                                                    |
| Dirnbock & Grabherr, 2000            | 270-450 mm/yr       | compilation of literature, modelling according to Turc-Wendling, an energy balance model | sub-alpine spruce forest on steep slope and pine tree forest in Alpine Austria                                                                                                                                                                                                                               |
| Dunn & Mackay, 1995                  | 766 (SD 45.3) mm/yr | model, based on Penman-Monteith with Rutter interception                                 | evergreen needleleaf forest in the Tyne Basin in North East England                                                                                                                                                                                                                                          |
| Federov, 1977                        | 480 mm/yr           | energy balance, micrometeorological measurements, lysimeter                              | tall spruce forest at Valdai station, Russia; Monthly measurements of evaporation were taken during the warmer months, May to October, using lysimeters. For the remaining months (November to April), an estimate of evaporation was calculated using the Budyko (1956) algorithm for potential evaporation |
| Franco-Vizcaino <i>et al.</i> , 2002 | 390 +/- 122 mm/yr   | soil water balance, lysimeter                                                            | Jeffrey pine forest in Baja Mexico - very arid                                                                                                                                                                                                                                                               |
| Franco-Vizcaino <i>et al.</i> , 2002 | 478 +/- 87 mm/yr    | soil water balance, lysimeter                                                            | mixed conifer forest in Baja Mexico - very arid                                                                                                                                                                                                                                                              |
| Franco-Vizcaino <i>et al.</i> , 2002 | 446 +/- 122 mm/yr   | soil water balance, lysimeter                                                            | mixed conifer forest in Baja Mexico - very arid                                                                                                                                                                                                                                                              |
| Frank & Inouye, 1994                 | 413 mm/yr           | model (Thornthwaite)                                                                     | taiga, Arkhangelsk, Russia                                                                                                                                                                                                                                                                                   |
| Frank & Inouye, 1994                 | 413 mm/yr           | model (Thornthwaite)                                                                     | taiga, Minusinsk, Russia                                                                                                                                                                                                                                                                                     |
| Frank & Inouye, 1994                 | 413 mm/yr           | model (Thornthwaite)                                                                     | taiga, Murmansk, Russia                                                                                                                                                                                                                                                                                      |
| Frank & Inouye, 1994                 | 413 mm/yr           | model (Thornthwaite)                                                                     | taiga, Petrozavodsk, Russia                                                                                                                                                                                                                                                                                  |
| Frank & Inouye, 1994                 | 413 mm/yr           | model (Thornthwaite)                                                                     | taiga, Jyvaskyla, Finland                                                                                                                                                                                                                                                                                    |
| Frank & Inouye, 1994                 | 413 mm/yr           | model (Thornthwaite)                                                                     | taiga, Ostersund, Sweden                                                                                                                                                                                                                                                                                     |
| Frank & Inouye, 1994                 | 413 mm/yr           | model (Thornthwaite)                                                                     | taiga, Fort Smith, Canada                                                                                                                                                                                                                                                                                    |

|                                |                                         |                                                   |                                                                                                                                                                                                                                           |
|--------------------------------|-----------------------------------------|---------------------------------------------------|-------------------------------------------------------------------------------------------------------------------------------------------------------------------------------------------------------------------------------------------|
| Frank & Inouye, 1994           | 413 mm/yr                               | model (Thornthwaite)                              | taiga, Moosonee, Canada                                                                                                                                                                                                                   |
| Frank & Inouye, 1994           | 413 mm/yr                               | model (Thornthwaite)                              | taiga, Norman Wells Canada                                                                                                                                                                                                                |
| Frank & Inouye, 1994           | 413 mm/yr                               | model (Thornthwaite)                              | taiga, Schefferville, Quebec, Canada                                                                                                                                                                                                      |
| Frank & Inouye, 1994           | 413 mm/yr                               | model (Thornthwaite)                              | taiga, The Pas, Canada                                                                                                                                                                                                                    |
| Frank & Inouye, 1994           | 413 mm/yr                               | model (Thornthwaite)                              | taiga, Arkhangelsk Russia                                                                                                                                                                                                                 |
| Galoux <i>et al.</i> , 1981    | 546-617 mm/yr                           | n/a                                               | pine forest in Berlin                                                                                                                                                                                                                     |
| Galoux <i>et al.</i> , 1981    | 610 mm/yr                               | n/a                                               | pine forest in Crowthorne                                                                                                                                                                                                                 |
| Gash & Stewart, 1977           | 566 mm/yr                               | n/a                                               | pine forest in Thetford                                                                                                                                                                                                                   |
| Grünwald, 2004                 | 474, 488, 504, 522, 470, 395, 378 mm/yr | eddy covariance                                   | measured above an old spruce forest, filled using mean diurnal courses with a 14-day window                                                                                                                                               |
| Helvey, 1973, 1980             | 442 mm/yr                               | catchment water balance                           | forest, Burns catchment, north-central Washington USA                                                                                                                                                                                     |
| Helvey, 1973, 1980             | 467 mm/yr                               | catchment water balance                           | forest, McCree catchment, north-central Washington USA                                                                                                                                                                                    |
| Hudson, 1988                   | 771 mm/yr                               | n/a                                               | spruce forest in Severn                                                                                                                                                                                                                   |
| Humphreys <i>et al.</i> , 2003 | 432, 435 mm/yr                          | eddy covariance                                   | 50-year old 33 m tall coastal Douglas Fir forest                                                                                                                                                                                          |
| Krestovsky, 1969b              | 430, 440, 490, 450 mm/yr                | n/a                                               | 100-140 year old pine and spruce forest in southern taiga subzone of European former USSR                                                                                                                                                 |
| Krestovsky, 1980               | 450-490 mm/yr                           | n/a                                               | spruce and pine forests, aged 100-120 year, in the southern taiga subzone in the European former USSR                                                                                                                                     |
| Launiainen, 2005               | 329 mm/yr                               | eddy covariance                                   | coniferous forest at Hyytiälä site, Finland                                                                                                                                                                                               |
| Law <i>et al.</i> , 2000       | 418 +/- 62.5 mm/yr                      | eddy covariance, micrometeorological measurements | Metolius site in a Research Natural Area, east side of Cascade Mountains; Ponderosa pine forest, 250 yr and some young, 45 year old                                                                                                       |
| Lieth & Solomon, 1985          | 100.73 mm/yr                            | GOES digital imagery, Turc 1954 model             | Arrow Creek near Creston BC, unlogged                                                                                                                                                                                                     |
| Löfgren, 2004a,b               | 409, 414, 463, 501, 412, 522 mm/yr      | micrometeorological measurements                  | Station SE15 Kindla, Norway Spruce. Trees have been felled for charcoal to be used in the neighbouring furnace since the 16th century. At the IM site eight "charcoal bottoms" have been traced, several of them with remnants of cabins. |

|                                |                                       |                                                                                                                                                                                   |                                                                                                                                  |
|--------------------------------|---------------------------------------|-----------------------------------------------------------------------------------------------------------------------------------------------------------------------------------|----------------------------------------------------------------------------------------------------------------------------------|
| Löfgren, 2004a,b               | 385, 440, 439, 510,<br>444, 268 mm/yr | micrometeorological measurements                                                                                                                                                  | Station SE16, Gammtratten, Norway<br>Spruce, Biggest trees felled around 1900.<br>Light grazing by cattle up to the 1950's       |
| Major, 1963                    | 388 mm/yr                             | model (Thornthwaite)                                                                                                                                                              | Arkangelsk, former USSR forest, northern<br>taiga forest                                                                         |
| Major, 1963                    | 322 mm/yr                             | model (Thornthwaite)                                                                                                                                                              | Crater Lake, Oregon (1974 m elevation);<br>assuming 100 mm available soil moisture<br>storage capacity                           |
| Major, 1963                    | 436 mm/yr                             | model (Thornthwaite)                                                                                                                                                              | Paradise Mountain, Rainier, Washington<br>USA (1690 m elevation); assuming 100<br>mm available soil moisture storage<br>capacity |
| Major, 1963                    | 248 mm/yr                             | model (Thornthwaite)                                                                                                                                                              | Gem Lake, California, USA (2780 m<br>elevation); assuming 100 mm available<br>soil moisture storage capacity                     |
| Major, 1963                    | 236 mm/yr                             | model (Thornthwaite)                                                                                                                                                              | Ellery L, California, USA (2930 m<br>elevation); assuming 100 mm available<br>soil moisture storage capacity                     |
| Mo <i>et al.</i> , 2004        | 593 mm/yr                             | process-based distributed model                                                                                                                                                   | Coniferous forest, Lushi basin, China                                                                                            |
| Molchanov, 1963                | 295 mm/yr                             | n/a                                                                                                                                                                               | pine forest in Volgograd                                                                                                         |
| Molchanov, 1963                | 596 mm/yr                             | n/a                                                                                                                                                                               | pine / spruce forest in Minsk                                                                                                    |
| Molchanov, 1963                | 329 mm/yr                             | n/a                                                                                                                                                                               | spruce / pine forest in Vologda                                                                                                  |
| Molchanov, 1963                | 448 mm/yr                             | n/a                                                                                                                                                                               | pine spruce forest in Orekhovo                                                                                                   |
| Murakami <i>et al.</i> , 2000  | 546 mm/yr (SD 75.2)                   | catchment water balance                                                                                                                                                           | mature Japanese cypress and cedar<br>forests                                                                                     |
| Nakano, 1967                   | 859 mm/yr                             | catchment water balance                                                                                                                                                           | pinus densiflora in Minanmitani catchment                                                                                        |
| Nakano, 1967                   | 823 mm/yr                             | catchment water balance                                                                                                                                                           | pinus densiflora in Kitatani catchment                                                                                           |
| Nijssen & Lettenmaier,<br>2002 | 250, 240, 243 mm/yr                   | extrapolation of eddy correlation and<br>bowen ratio methods to basin using<br>Penman-Monteith combination<br>equation and LAI weighted versions of<br>multiple regression models | mature jack pine in the White Gull Creek<br>Basin, Saskatchewan, Canada                                                          |
| Nijssen & Lettenmaier,<br>2002 | 315, 320, 324 mm/yr                   | extrapolation of eddy correlation and<br>bowen ratio methods to basin using<br>Penman-Monteith combination<br>equation and LAI weighted versions of<br>multiple regression models | mature black spruce in the White Gull<br>Creek Basin, Saskatchewan, Canada                                                       |
| Pavlov, 1976                   | 200-240 mm/yr                         | n/a                                                                                                                                                                               | boreal forest                                                                                                                    |

|                              |                            |                                                                                                                                                     |                                                                                                                               |
|------------------------------|----------------------------|-----------------------------------------------------------------------------------------------------------------------------------------------------|-------------------------------------------------------------------------------------------------------------------------------|
| Post & Jones, 2001           | 968, 981, 1007 mm/yr       | catchment water balance                                                                                                                             | Andrews 2,8,9 long term control basins, in Andrews Experimental LTER                                                          |
| Rauner, 1966                 | 400-450 mm/yr              | it has been suggested [Zubenok, 1976, Rakhmanov, 1981, Gidromet, 1976, Fedorov, 1977] that Rauner overestimated forest ET by approximately 5 to 15% | calculated the evaporation from forests of the European former USSR and plotted isoline maps                                  |
| Rauner, 1966                 | 500 mm/yr                  | it has been suggested [Zubenok, 1976, Rakhmanov, 1981, Gidromet, 1976, Fedorov, 1977] that Rauner overestimated forest ET by approximately 5 to 15% | calculated the evaporation from forests of the European former USSR and plotted isoline maps                                  |
| Rauner, 1966                 | 575 mm/yr                  | it has been suggested [Zubenok, 1976, Rakhmanov, 1981, Gidromet, 1976, Fedorov, 1977] that Rauner overestimated forest ET by approximately 5 to 15% | calculated the evaporation from forests of the European former USSR and plotted isoline maps                                  |
| Rauner, 1966                 | 525-550 mm/yr              | it has been suggested [Zubenok, 1976, Rakhmanov, 1981, Gidromet, 1976, Fedorov, 1977] that Rauner overestimated forest ET by approximately 5 to 15% | calculated the evaporation from forests of the European former USSR and plotted isoline maps                                  |
| Rauner, 1966                 | 576-600 mm/yr              | it has been suggested [Zubenok, 1976, Rakhmanov, 1981, Gidromet, 1976, Fedorov, 1977] that Rauner overestimated forest ET by approximately 5 to 15% | calculated the evaporation from forests of the European former USSR and plotted isoline maps                                  |
| Rich <i>et al.</i> , 1961    | 727 mm/yr                  | catchment water balance                                                                                                                             | conifer forest, North Fork, Workman experimental watershed                                                                    |
| Rich <i>et al.</i> , 1961    | 726 mm/yr                  | catchment water balance                                                                                                                             | conifer forest, South Fork, Workman experimental watershed                                                                    |
| Rich, 1968                   | 568 mm/yr                  | catchment water balance                                                                                                                             | Castle Creek catchment, conifer forest, Arizona                                                                               |
| Rosenzweig, 1968             | log 2.61, 2.64, 2.68 mm/yr | model (Thorntwaite)                                                                                                                                 | fraser fir and spruce fir forest Gt. Smky Mts, TN                                                                             |
| Running <i>et al.</i> , 1989 | 40-60 cm/yr                | simulation model (FOREST-BGC)                                                                                                                       | predominantly coniferous forests in western Montana, the part of the study area that was not heavily clearcut                 |
| Sharpe, 1970                 | 341 (44 SD) mm/yr          | measured at site, Thorntwaite method                                                                                                                | station C-1, Niwot Ridge, Front Range, Colorado; assumed 100 mm of available soil moisture storage capacity; subalpine forest |
| Sharpe, 1970                 | 330 (45 SD) mm/yr          | measured at site, Thorntwaite method                                                                                                                | Berthoud Pass, Front Range, Colorado; assumed 100 mm of available soil moisture storage capacity; subalpine forest            |

|                                                           |                     |                                                                     |                                                                                                                                        |
|-----------------------------------------------------------|---------------------|---------------------------------------------------------------------|----------------------------------------------------------------------------------------------------------------------------------------|
| Sharpe, 1970                                              | 321 (63 SD) mm/yr   | measured at site, Thornthwaite method                               | Leadville, Colorado; assumed 100 mm of available soil moisture storage capacity; subalpine forest                                      |
| Sharpe, 1970                                              | 321 (46 SD) mm/yr   | measured at site, Thornthwaite method                               | Climax, 2NW Colorado; assumed 100 mm of available soil moisture storage capacity; subalpine forest                                     |
| Sharpe, 1970                                              | 381 (29 SD) mm/yr   | measured at site, Thornthwaite method                               | Lake Moraine, Pike's Peak Colorado; assumed 100 mm of available soil moisture storage capacity; subalpine forest                       |
| Sharpe, 1970                                              | 369 (32 SD) mm/yr   | measured at site, Thornthwaite method                               | Wolf Creek Pass 1 East, Colorado; assumed 100 mm of available soil moisture storage capacity; subalpine forest                         |
| Sharpe, 1970                                              | 326 (34 SD) mm/yr   | measured at site, Thornthwaite method                               | Summitville, Colorado; assumed 100 mm of available soil moisture storage capacity; subalpine forest                                    |
| Sharpe, 1970                                              | 334 (51 SD) mm/yr   | measured at site, Thornthwaite method                               | Wagon Wheel Gap Expt. Station, Colorado; assumed 100 mm of available soil moisture storage capacity; upper Montane forest              |
| Sharpe, 1970                                              | 300 (50 SD) mm/yr   | measured at site, Thornthwaite method                               | Wagon Wheel Gap Expt. Station, near Timberline, Colorado; assumed 100 mm of available soil moisture storage capacity; subalpine forest |
| Sumner, 2001                                              | 993 mm/yr           | energy budget variation of eddy correlation                         | Tiger Bay watershed Volusia County, Florida, pine flatwood tree plantation                                                             |
| Sun <i>et al.</i> , 1998                                  | 1002.7 mm/yr        | FLATWOODS model                                                     | "control" sites in North central Florida: Gator National forest and Bradford forest; two sites simulated for a dry, normal, wet year   |
| Tattari & Ikonen, 1997                                    | 600, 620, 605 mm/yr | ASTIM model                                                         | Pine and spruce forests on moraine, and pine swamps                                                                                    |
| Thornton <i>et al.</i> , 2002<br>Law <i>et al.</i> , 2002 | 357, 339 mm/yr      | coupled water-carbon-nitrogen model, canopy-scale flux observations | Howland forest, ME, select cut 1910                                                                                                    |
| Thornton <i>et al.</i> , 2002; Law <i>et al.</i> , 2002   | 521, 444 mm/yr      | coupled water-carbon-nitrogen model, canopy-scale flux observations | Metolius, OR; fire disturbance in 1750, 1850, 1950                                                                                     |
| Thornton <i>et al.</i> , 2002; Law <i>et al.</i> , 2002   | 640, 537 mm/yr      | coupled water-carbon-nitrogen model, canopy-scale flux observations | Nitwot ridge CO (harvested 1905, assume returned to equilibrium after 95 years)                                                        |
| Thornton <i>et al.</i> , 2002; Law <i>et al.</i> , 2002   | 542, 443 mm/yr      | coupled water-carbon-nitrogen model, canopy-scale flux observations | Wind river Washington State                                                                                                            |
| Tiktak & Bouten, 1994                                     | 712 mm/yr           | model 'SWIF'                                                        | Douglas Fir Stand in the Netherlands                                                                                                   |



|                               |                              |                                                           |                                                   |
|-------------------------------|------------------------------|-----------------------------------------------------------|---------------------------------------------------|
| TVA, 1961                     | 720 mm/yr                    | Catchment water balance                                   | Douglas Fir forests in White Hollow Catchment, TN |
| Vesala & Launiainen, 2004     | 329 mm/yr                    | Eddy covariance                                           | coniferous forest at Hyytiälä site                |
| Waterloo, 1994                | 1512 mm/yr                   | n/a                                                       | mature pine stand in Fiji                         |
| Williams <i>et al.</i> , 2001 | 436 +/- 65, 400 +/- 60 mm/yr | Metolius ponderosa pine site, eastern Cascades; mixed age |                                                   |

Table S1.10. Annual evapotranspiration of deciduous broadleaf forest areas

| Source                        | ET                               | Method                                                                                   | Description                                                                              |
|-------------------------------|----------------------------------|------------------------------------------------------------------------------------------|------------------------------------------------------------------------------------------|
| ADWR, 1991                    | 1271-1198 mm/yr                  | Blaney-Criddle                                                                           | riparian cottonwoods and willow in the San Pedro River Basin, Sierra Vista sub watershed |
| Amoriello & Constantini, 1999 | 248.7, 313.3 mm/yr               | micrometeorological measurements                                                         | Beech Forest, Selva Plana 01-ABR1-IP                                                     |
| Amoriello & Constantini, 1999 | 353.0, 382.1 mm/yr               | micrometeorological measurements                                                         | Oak Forest, Carrega 05-EMI1-IP                                                           |
| Amoriello & Constantini, 1999 | 421.8 mm/yr                      | micrometeorological measurements                                                         | Beech Forest, Brasimone 06-EMI2-IP                                                       |
| Amoriello & Constantini, 1999 | 388.0, 361.3 mm/yr               | micrometeorological measurements                                                         | Oak Forest, Monte Rufino, 09-LAZ1-IP                                                     |
| Amoriello & Constantini, 1999 | 420.3, 407.9, 339.4, 421.4 mm/yr | micrometeorological measurements                                                         | Oak Forest, Colognole, 16-TOS1                                                           |
| Baldocchi, pers comm.         | 600-620 mm/yr                    | eddy covariance                                                                          | oak forest                                                                               |
| Barr <i>et al.</i> , 2000     | 360 mm/yr                        | eddy correlation and deep groundwater piezometer                                         | mature boreal aspen forest in Saskatchewan                                               |
| Black <i>et al.</i> , 1996    | 403 mm/yr                        | eddy covariance                                                                          | deciduous aspen stand in Canada during 1994                                              |
| Blanken <i>et al.</i> , 2001  | 401.1, 412.1, 422.8 mm/yr        | eddy covariance                                                                          | even-aged stand of trembling aspen near Prince Albert, Saskatchewan                      |
| Calder, 2003                  | 553, 594 mm/yr                   | HYLUC model                                                                              | Greenwood Community Forest, broadleaf in sand and loam soil                              |
| Dirnbock & Grabherr, 2000     | 270-360 mm/yr                    | compilation of literature; modelling according to Turc-Wendling, an energy balance model | montane beech forest in Austria                                                          |

|                                  |                                                          |                                                                                                      |                                                                                                                                                          |
|----------------------------------|----------------------------------------------------------|------------------------------------------------------------------------------------------------------|----------------------------------------------------------------------------------------------------------------------------------------------------------|
| Dunn & Mackay, 1995              | 633 (SD 30.7) mm/yr                                      | model, based on Penman-Monteith with Rutter interception                                             | deciduous forest in the Tyne Basin in North East England                                                                                                 |
| Flerchinger <i>et al.</i> , 1996 | 570 (+/- 3), 456 (+/- 51) mm/yr                          | Simultaneous Heat and Water Model (SHAW), detailed physical process model applied to 2 years of data | southwestern Idaho, Aspen, using SHAW model and meteorological measurements                                                                              |
| Frank & Inouye, 1994             | 588 mm/yr                                                | model (Thornthwaite)                                                                                 | broadleaf forest, Hopkinsville, KY                                                                                                                       |
| Frank & Inouye,                  | 588 mm/yr                                                | model (Thornthwaite)                                                                                 | broadleaf forest, Mansfield Hollow, CN                                                                                                                   |
| Frank & Inouye,                  | 588 mm/yr                                                | model (Thornthwaite)                                                                                 | broadleaf forest, New Castle, PN                                                                                                                         |
| Frank & Inouye,                  | 588 mm/yr                                                | model (Thornthwaite)                                                                                 | broadleaf forest, Bourges, France                                                                                                                        |
| Frank & Inouye,                  | 588 mm/yr                                                | model (Thornthwaite)                                                                                 | broadleaf forest, Gatwick, GB                                                                                                                            |
| Frank & Inouye,                  | 588 mm/yr                                                | model (Thornthwaite)                                                                                 | broadleaf forest, Gorlitz, Germany                                                                                                                       |
| Frank & Inouye,                  | 588 mm/yr                                                | model (Thornthwaite)                                                                                 | broadleaf forest, Opole, Poland                                                                                                                          |
| Frank & Inouye,                  | 588 mm/yr                                                | model (Thornthwaite)                                                                                 | broadleaf forest, Thorshaun, Denmark                                                                                                                     |
| Frank & Inouye,                  | 588 mm/yr                                                | model (Thornthwaite)                                                                                 | broadleaf forest, Battle Creek, Michigan                                                                                                                 |
| Frank & Inouye,                  | 588 mm/yr                                                | model (Thornthwaite)                                                                                 | broadleaf forest, Columbus, OH                                                                                                                           |
| Friend <i>et al.</i> , 1997      | 841, 1319, 1387 MJ/m <sup>2</sup> /yr                    | simulated IE from Hybrid v3.0.                                                                       | simulated IE from Hybrid v3.0. Values are the means of 10 plots over the last 100 years of a 500 year simulation                                         |
| Granier, 2004                    | 314.2, 317.3, 346.5, 404.3, 440.3, 366.4, 368, 298 mm/yr | eddy covariance                                                                                      | Hesse Beech Forest                                                                                                                                       |
| Granier, 2004                    | 314.2, 317.3, 346.5, 404.3, 440.3, 366.4, 368, 298 mm/yr | eddy covariance                                                                                      | Hesse Beech Forest                                                                                                                                       |
| Hoover, 1944                     | 1072 mm/yr                                               | n/a                                                                                                  | Oak / Hickory forest in Coweeta                                                                                                                          |
| Johnston 1970                    | 21.00 in/yr                                              | soil water balance                                                                                   | plot: scrubby aspen clones, located near head of Parrish Canyon on the Davis County Experimental Watershed near Bountiful, Utah, elevation 8400 feet asl |
| Kostin, 1970                     | 541 mm/yr                                                | from energy and water balance estimates                                                              | coniferous broad-leaved and broad-leaved forest province (Orel, Mtsensk, Russia). SW of Moscow, in Central Chernozem belt                                |
| Kostner, 2001                    | 370-600 mm/yr                                            | sap flow, eddy covariance                                                                            | beech forests, according to literature reviewed by Peck & Mayer (1996)                                                                                   |

|                                |                               |                                                                                                                                                                       |                                                                                                                                                                                                                                   |
|--------------------------------|-------------------------------|-----------------------------------------------------------------------------------------------------------------------------------------------------------------------|-----------------------------------------------------------------------------------------------------------------------------------------------------------------------------------------------------------------------------------|
| Krestovsky, 1980               | 585 mm/yr                     | catchment water balance, Bowen-Ratio Energy-Balance, Micrometeorological measurements                                                                                 | birch and aspen, aged 50-60 years, in the southern taiga subzone in the European former USSR                                                                                                                                      |
| Law, 1957                      | 421 mm                        | lysimeter                                                                                                                                                             | woodland in Hodder catchment                                                                                                                                                                                                      |
| Lewis, 1968                    | 490 mm/yr                     | catchment water balance                                                                                                                                               | Oak woodland forest, Placer county catchment                                                                                                                                                                                      |
| Li <i>et al.</i> , 2010        |                               |                                                                                                                                                                       |                                                                                                                                                                                                                                   |
| Luxmoore, 1983                 | 655 mm/yr                     |                                                                                                                                                                       | oak forest                                                                                                                                                                                                                        |
| Major, 1963                    | 618 mm/yr                     | model (Thornthwaite)                                                                                                                                                  | forest in Great Smoky Mountains, TN, USA                                                                                                                                                                                          |
| Major, 1963                    | 1003mm/yr                     | model (Thornthwaite)                                                                                                                                                  | tropical and subtropical dry broadleaf forests near Acapulco, Mexico                                                                                                                                                              |
| Mo <i>et al.</i> , 2004        | 567 mm/yr                     | process-based distributed model                                                                                                                                       | Broadleaf forest, Lushi basin, China                                                                                                                                                                                              |
| Molchanov, 1963                | 431 mm/yr                     | n/a                                                                                                                                                                   | oak forest in Lugansk                                                                                                                                                                                                             |
| Mulholland, pers. comm.        | 620 mm/yr                     | catchment water balance                                                                                                                                               | oak forest                                                                                                                                                                                                                        |
| Murai, 1980<br>Tsukamoto, 1992 | 801 mm/yr                     | n/a                                                                                                                                                                   | Fagus Natural Forest Site in Shizuoka County, Central Japan                                                                                                                                                                       |
| Nijssen & Lettenmaier, 2002    | 422, 437, 458 mm/yr           | extrapolation of eddy correlation and bowen ratio methods to basin using Penman-Monteith combination equation and LAI weighted versions of multiple regression models | mature aspen in the White Gull Creek Basin, Saskatchewan, Canada                                                                                                                                                                  |
| Oliphant, <i>et al.</i> , 2002 | 1600 MJ                       | n/a                                                                                                                                                                   | midwestern deciduous hardwood forest; transition zone, mixed species, selectively logged, Morgan Monroe State Forest (MMSF), extensive secondary successional broadleaf forest, in the maple-beech to oak-hickory transition zone |
| Pilgrim <i>et al.</i> , 1982   | 600 mm/yr                     | catchment water balance                                                                                                                                               | native eucalypt forest at Lidsdale, Australia                                                                                                                                                                                     |
| Post & Jones, 2001             | 497, 497, 525, 496, 530 mm/yr | catchment water balance                                                                                                                                               | Hubbard Brook 1, 3, 6, 7, 8 basins in Hubbard Brook experimental forest                                                                                                                                                           |
| Roberts, 1998                  | 384-445 mm/yr                 | empirical relations                                                                                                                                                   | lowland and upland coniferous forests                                                                                                                                                                                             |
| Rosenzweig, 1968               | log 2.75 mm/yr                | model (Thornthwaite)                                                                                                                                                  | climax beech-maple forest Toronto ON, Canada                                                                                                                                                                                      |
| Rosenzweig, 1968               | log 2.92 mm/yr                | model (Thornthwaite)                                                                                                                                                  | oak-hickory forest, Oak Ridge, TN                                                                                                                                                                                                 |

|                               |                     |                                                      |                                                                                                                                           |
|-------------------------------|---------------------|------------------------------------------------------|-------------------------------------------------------------------------------------------------------------------------------------------|
| Rosenzweig, 1968              | log 2.69 mm/yr      | model (Thornthwaite)                                 | grey beech forest, Gt. Smky Mts, TN                                                                                                       |
| Rosenzweig, 1968              | log 2.85 mm/yr      | model (Thornthwaite)                                 | deciduous cove forest, Gt. Smky Mts, TN                                                                                                   |
| Sun <i>et al.</i> , 2002      | 779 mm/yr           | model                                                | mature deciduous oak hardwoods in mountainous North Carolina                                                                              |
| Tajchman <i>et al.</i> , 1997 | 817 mm/yr           | water balance                                        | oaks and maple in Appalachians                                                                                                            |
| Unland <i>et al.</i> , 1998   | 1.697 m/yr          | micrometeorological measurements, soil water balance | cottonwood in riparian area of Santa Cruz River in southern Arizona                                                                       |
| White <i>et al.</i> , 1999    | 57.5 (SD 0.9) cm/yr | ecosystem model (BIOME-BGC)                          | Burlington Vt. site in deciduous broadleaf forest                                                                                         |
| White <i>et al.</i> , 1999    | 49.9 (SD 0.6) cm/yr | ecosystem model (BIOME-BGC)                          | Portland Me. site in deciduous broadleaf forest                                                                                           |
| White <i>et al.</i> , 1999    | 56.7 (SD 0.9) cm/yr | ecosystem model (BIOME-BGC)                          | Albany, NY site in deciduous broadleaf forest                                                                                             |
| White <i>et al.</i> , 1999    | 54.6 (SD 0.9) cm/yr | ecosystem model (BIOME-BGC)                          | Blue Hill, Mass. site in deciduous broadleaf forest                                                                                       |
| White <i>et al.</i> , 1999    | 55.9 (SD 0.9) cm/yr | ecosystem model (BIOME-BGC)                          | Ann Arbor, Mich. site in deciduous broadleaf forest                                                                                       |
| White <i>et al.</i> , 1999    | 62.1 (SD 0.9) cm/yr | ecosystem model (BIOME-BGC)                          | Wooster Ohio site in deciduous broadleaf forest                                                                                           |
| White <i>et al.</i> , 1999    | 62.7 (SD 1.0) cm/yr | ecosystem model (BIOME-BGC)                          | Monmouth, Ill. site in deciduous broadleaf forest                                                                                         |
| White <i>et al.</i> , 1999    | 59.8 (SD 1.1) cm/yr | ecosystem model (BIOME-BGC)                          | New Brunswick, NJ site in deciduous broadleaf forest                                                                                      |
| White <i>et al.</i> , 1999    | 63.1 (SD 1.1) cm/yr | ecosystem model (BIOME-BGC)                          | Washington, Ind. site in deciduous broadleaf forest                                                                                       |
| White <i>et al.</i> , 1999    | 69.6 (SD 1.0) cm/yr | ecosystem model (BIOME-BGC)                          | Rogersville, Tenn. site in deciduous broadleaf forest                                                                                     |
| White <i>et al.</i> , 1999    | 69.7 (SD 0.8) cm/yr | ecosystem model (BIOME-BGC)                          | Monroe N.C. site in deciduous broadleaf forest                                                                                            |
| White <i>et al.</i> , 1999    | 66.0 (SD 0.6) cm/yr | ecosystem model (BIOME-BGC)                          | Charleston, S.C. site in deciduous broadleaf forest                                                                                       |
| Wilson & Baldocchi, 2000      | 567.2 mm/yr         | eddy covariance, micrometeorological measurements    | estimated evaporation (sum of measured evaporation and the estimated evaporation when data was missing. For NA temperate deciduous forest |
| Wilson <i>et al.</i> , 2001   | 645 (+/- 20) mm/yr  | catchment water balance                              | uneven-aged mixed deciduous forest in southeastern USA                                                                                    |
| Wilson <i>et al.</i> , 2001   | 571 (+/- 16) mm/yr  | eddy covariance                                      | uneven-aged mixed deciduous forest in southeastern USA                                                                                    |

Table S1.11. Annual evapotranspiration of mixed forest area

| Source                      | ET              | Method                                                                                   | Description                                                                                                                       |
|-----------------------------|-----------------|------------------------------------------------------------------------------------------|-----------------------------------------------------------------------------------------------------------------------------------|
| Allen, 2000                 | 1300-1470 mm/yr | FAO56-PM equation and the 1985 Hargreaves equation                                       | forest in Gediz River, Turkey                                                                                                     |
| Baumgartner, 1972           | 450 mm/yr       | lysimeter                                                                                | pinus & oaks; assumed per year                                                                                                    |
| Calder, 2003                | 554, 594 mm/yr  | HYLUC model                                                                              | Greenwood Community Forest, mixed forest in sand & loam soil                                                                      |
| Cheng <i>et al.</i> , 2002  | 1198 mm/yr      | catchment water balance                                                                  | PL-11 watershed in Taiwan Taiwanese forests; dense forests of coniferous species on slopes and hardwood species in valley bottoms |
| Dirnbock and Grabherr, 2000 | 270-360 mm/yr   | compilation of literature, modelling according to Turc-Wendling, an energy balance model | montane spruce / fir tree / beech forest in alpine Austria                                                                        |
| Frank & Inouye, 1994        | 543 mm/yr       | model (Thorntwaite)                                                                      | broadleaf-needleleaf forest, Jonkopings, Sweden                                                                                   |
| Frank & Inouye, 1994        | 543 mm/yr       | model (Thorntwaite)                                                                      | broadleaf-needleleaf forest, Burlington, VT                                                                                       |
| Frank & Inouye, 1994        | 543 mm/yr       | model (Thorntwaite)                                                                      | broadleaf-needleleaf forest, Concord, NH                                                                                          |
| Frank & Inouye, 1994        | 543 mm/yr       | model (Thorntwaite)                                                                      | broadleaf-needleleaf forest, Green Bay, WS                                                                                        |
| Frank & Inouye, 1994        | 543 mm/yr       | model (Thorntwaite)                                                                      | broadleaf-needleleaf forest, Lewiston Massac                                                                                      |
| Frank & Inouye, 1994        | 543 mm/yr       | model (Thorntwaite)                                                                      | broadleaf-needleleaf forest, Syracuse, NY                                                                                         |
| Frank & Inouye, 1994        | 543 mm/yr       | model (Thorntwaite)                                                                      | broadleaf-needleleaf forest, Jonkopings, Sweden                                                                                   |
| Frank & Inouye, 1994        | 821 mm/yr       | model (Thorntwaite)                                                                      | coniferous-deciduous forest, Camden, SC                                                                                           |
| Frank & Inouye, 1994        | 821 mm/yr       | model (Thorntwaite)                                                                      | coniferous-deciduous forest, Durham, NC                                                                                           |
| Frank & Inouye, 1994        | 821 mm/yr       | model (Thorntwaite)                                                                      | coniferous-deciduous forest, Lakeland, FL                                                                                         |
| Frank & Inouye, 1994        | 821 mm/yr       | model (Thorntwaite)                                                                      | coniferous-deciduous forest, Macon, GA                                                                                            |
| Frank & Inouye, 1994        | 821 mm/yr       | model (Thorntwaite)                                                                      | coniferous-deciduous forest, Montgomery, AB                                                                                       |
| Hoover, 1944                | 878 mm/yr       | catchment water balance                                                                  | mixed forests in Coweeta (17) catchment, NC                                                                                       |
| Molchanov, 1963             | 410 mm/yr       | n/a                                                                                      | oak / pine forest in Voronezh                                                                                                     |
| Molchanov, 1963             | 401 mm/yr       | n/a                                                                                      | spruce / birch forest in Sareevo (in Vologda district)                                                                            |

|                                   |                                         |                                                                                                                                                                       |                                                                           |
|-----------------------------------|-----------------------------------------|-----------------------------------------------------------------------------------------------------------------------------------------------------------------------|---------------------------------------------------------------------------|
| Molchanov, 1963                   | 406 mm/yr                               | n/a                                                                                                                                                                   | spruce birch forest in Istra                                              |
| Molchanov, 1963                   | 378 mm/yr                               | n/a                                                                                                                                                                   | spruce elm forest in Kalinin                                              |
| Molchanov, 1963                   | 286 mm/yr                               | n/a                                                                                                                                                                   | pine birch forest in Arkhangelsk                                          |
| National Park Service, 1982       | 1061 mm/yr                              | n/a                                                                                                                                                                   | moist (assumed mixed) forest in Big Thicket National Preserve, Texas      |
| Nijssen & Lettenmaier, 2002       | 387, 398, 411 mm/yr                     | extrapolation of eddy correlation and bowen ratio methods to basin using Penman-Monteith combination equation and LAI weighted versions of multiple regression models | mixed forest in the White Gull Creek Basin, Saskatchewan, Canada          |
| Pearce & Rowe, 1979<br>Rowe, 1979 | 1100 mm/yr                              | n/a                                                                                                                                                                   | experimental mixed forest for Maimai catchment, South Island, New Zealand |
| Pearce <i>et al.</i> , 1976       | 1100 mm/yr                              | catchment water balance                                                                                                                                               | mixed beech forest in Maimai (M7) catchment                               |
| Pearce <i>et al.</i> , 1976       | 1100 mm/yr                              | catchment water balance                                                                                                                                               | mixed beech forest in Maimai (M9) catchment                               |
| Post & Jones, 2001                | 954, 866, 916, 719, 834, 831, 528 mm/yr | catchment water balance                                                                                                                                               | Coweeta 2, 14, 18, 27, 32, 34, 36 basins in Coweeta experimental forest   |
| Rosenzweig, 1968                  | log 2.82 mm/yr                          | model (Thornthwaite)                                                                                                                                                  | hemlock – mixed forest, Gt. Smky Mts TN                                   |
| Rosenzweig, 1968                  | log 2.75 mm/yr                          | model (Thornthwaite)                                                                                                                                                  | hemlock – rhododendron forest, Gt. Smky Mts TN                            |
| Walter & Hedin, 2002              | 430 mm/yr                               | watershed mass balance                                                                                                                                                | remote unpolluted Chilean old growth forests                              |

Table S1.12. Annual evapotranspiration of Savannah

| Source                | ET            | Method                  | Description                                      |
|-----------------------|---------------|-------------------------|--------------------------------------------------|
| Balek & Perry, 1973   | 1000-1350     | n/a                     | Brachystegia woodland, Luano catchment, Zambia   |
| Bernard, 1948         | 95-100 cm /yr | direct measurements     | savannah country in Belgian Congo, central basin |
| Bosch & Hewlett, 1982 | 800 mm/yr     | catchment water balance | Fynbos in Biesievlei catchment                   |
| Bosch & Hewlett, 1982 | 800 mm/yr     | catchment water balance | Fynbos in Bosboukloof catchment                  |
| Bosch & Hewlett, 1982 | 837 mm/yr     | catchment water balance | Fynbos in Lambrechtsbos (A) catchment            |
| Bosch & Hewlett, 1982 | 991 mm/yr     | catchment water balance | Fynbos in Lambrechtsbos (B) catchment            |
| Bosch & Hewlett, 1982 | 709 mm/yr     | catchment water balance | Fynbos in Tierkloof catchment                    |

|                                |                                       |                                                                   |                                                                                                                                                                                                      |
|--------------------------------|---------------------------------------|-------------------------------------------------------------------|------------------------------------------------------------------------------------------------------------------------------------------------------------------------------------------------------|
| Choudhury <i>et al.</i> , 1998 | 1000 mm/yr                            | biophysical process-based model with satellite & ancillary data   | savannah                                                                                                                                                                                             |
| Choudhury <i>et al.</i> , 1998 | 894 mm/yr                             | biophysical process-based model with satellite & ancillary data   | savannah                                                                                                                                                                                             |
| Choudhury <i>et al.</i> , 1998 | 900 mm/yr                             | biophysical process-based model with satellite & ancillary data   | savannah                                                                                                                                                                                             |
| Cook <i>et al.</i> , 1998      | 1110 mm/yr                            | eddy covariance / energy balance                                  | Howard River, NT, Australia; assuming wet season evaporation in this region scales with radiation, and use monthly global irradiation values to constrain annual ET estimate; open eucalypt woodland |
| Dye, 1996                      | 548 mm/yr                             | catchment water balance                                           | scrub forest in Westfalia catchment                                                                                                                                                                  |
| Everson, 2001                  | 695.5 mm/yr                           | Bowen Ratio Energy Balance, Penman Monteith, Equilibrium equation | Cathedral Peak Forestry Research Station, northern Natal Drakensberg Park, South Africa, received biennial spring burning treatment                                                                  |
| Frank & Inouye, 1994           | 894 mm/yr                             | model (Thornthwaite)                                              | savannah in Brasilia, Brazil                                                                                                                                                                         |
| Frank & Inouye, 1994           | 894 mm/yr                             | model (Thornthwaite)                                              | savannah in Cuiba, Brazil                                                                                                                                                                            |
| Frank & Inouye, 1994           | 894 mm/yr                             | model (Thornthwaite)                                              | savannah in San Fernando, Venezuela                                                                                                                                                                  |
| Hoffman & Jackson, 2000        | 1142 mm/yr                            | simulation with land surface model                                | llanos, from GCM model                                                                                                                                                                               |
| Hoffman & Jackson, 2000        | 896 mm/yr                             | simulation with land surface model                                | southern Africa, from GCM model                                                                                                                                                                      |
| Hoffman & Jackson, 2000        | 894 mm/yr                             | simulation with land surface model                                | northern Africa, from GCM model                                                                                                                                                                      |
| Hoffman & Jackson, 2000        | 1080 mm/yr                            | simulation with land surface model                                | cerrado; from GCM model                                                                                                                                                                              |
| Hoffman & Jackson, 2000        | 789 mm/yr                             | simulation with land surface model                                | Australia, from GCM model                                                                                                                                                                            |
| Hutley <i>et al.</i> , 2000    | 958 mm/yr                             | eddy covariance, heat pulse and open top chambers                 | eucalypt open-forest in Howard Springs, Northern Territory, Australia                                                                                                                                |
| L'vovitch, 1979                | 280 mm/yr                             | n/a                                                               | subtropical and tropical desertic savannah                                                                                                                                                           |
| L'vovitch, 1979                | 870 mm/yr                             | n/a                                                               | subtropical and tropical dry savannah                                                                                                                                                                |
| L'vovitch, 1979                | 1200 mm/yr                            | n/a                                                               | subtropical and tropical wet savannah                                                                                                                                                                |
| L'vovitch, 1979                | 530 mm/yr                             | n/a                                                               | temperate wooded steppes and prairies                                                                                                                                                                |
| Rockstrom <i>et al.</i> , 1999 | 882 mm/yr (range of 870-894 mm/yr)    | compilation of literature                                         | savannah / woodland, dry                                                                                                                                                                             |
| Rockstrom <i>et al.</i> , 1999 | 1267 mm/yr (range of 1100-1500 mm/yr) | compilation of literature                                         | savannah/woodland, wet                                                                                                                                                                               |

|                                            |                                    |                                                           |                                                                    |
|--------------------------------------------|------------------------------------|-----------------------------------------------------------|--------------------------------------------------------------------|
| Rockstrom <i>et al.</i> , 1999             | 416 mm/yr (range of 300-530 mm/yr) | compilation of literature                                 | woodland/ woody savannah                                           |
| Roose, 1979<br>Hutley <i>et al.</i> , 2000 | 1064 mm/yr                         | water balance                                             | savannah, Ivory Coast                                              |
| San Jose & Montes, 1992, 1995              | 783 mm/yr                          | water balance                                             | Orinoco Savanna, Venezuela                                         |
| Scholes & Walker, 1993                     | 445-717 mm/yr                      | simulation model, climatological data, soil water balance | water budget for broad-leafed savannah at Nylsvley                 |
| Smith-Carrington, 1983                     | 700-750 mm/yr                      | n/a                                                       | Bua catchment, woodland interfleuve and fallow interfleuve, Malawi |
| Vardavas, 1988                             | 935 mm/yr                          | Priestly & Taylor, 1972                                   | Magela Creek NT, Australia                                         |
| Vertessy & Bessard, 1999                   | 0.666 m/yr                         | n/a                                                       | woodland in New South Wales, Australia                             |

Table S1.13. Annual evapotranspiration of Grassland

| Source                        | ET                | Method                                       | Description                                                                                                                                 |
|-------------------------------|-------------------|----------------------------------------------|---------------------------------------------------------------------------------------------------------------------------------------------|
| ADWR, 1991                    | 954 mm/yr         | Blaney-Criddle                               | cienega / dense grass in riparian area of the San Pedro River Basin, Sierra Vista sub watershed                                             |
| Bailly <i>et al.</i> , 1974   | 1425 mm/yr        | soil water balance                           | Manankazo, Madagascar, pinus patula plantation, 4-10 yrs                                                                                    |
| Balek & Perry, 1973           | 500 mm/yr         | n/a                                          | dambo grassland Luano catchment, Zambia                                                                                                     |
| Berger, 2001                  | 4.07 - 5.73 ft/yr | Bowen-Ratio Energy-Balance, eddy correlation | meadow and grassland in Ruby Lake National Wildlife Refuge Area, Ruby Valley, northeastern Nevada                                           |
| Bidlake <i>et al.</i> , 1996  | 1010 mm/yr        | Bowen-Ratio Energy-Balance                   | dry prairie vegetation in west-central Florida                                                                                              |
| Brye <i>et al.</i> , 2000     | 515, 486 mm/yr    | soil water balance                           | for prairie plot, restored from an agricultural field in 1976, and burned every three years, except no burning for 5 years before the study |
| Calder, 1982                  | 799 mm/yr         |                                              | Wye catchment                                                                                                                               |
| Caldwell <i>et al.</i> , 1977 | 225 mm/yr         |                                              | shrub in cool grassland in Curlew Valley                                                                                                    |
| Campbell & Murray, 1990       | 622 mm/yr         |                                              | grassland in Otago, New Zealand                                                                                                             |
| Campbell & Murray, 1990       | 536 mm/yr         | lysimeter                                    | narrow-leaved snow tussock, in a broad tussock covered ridge 570 m above sea level, in the upper Waipori catchment in eastern Otago, NZ.    |
| Chen <i>et al.</i> , 1997     | 526 mm/yr         | meteorological observations                  | short grass vegetation, Cabauw, Netherlands                                                                                                 |



|                                |                   |                                                                 |                                                                                                           |
|--------------------------------|-------------------|-----------------------------------------------------------------|-----------------------------------------------------------------------------------------------------------|
| Choudhury <i>et al.</i> , 1998 | 894-1090 mm/yr    | biophysical process-based model with satellite & ancillary data | range for annual average values for 3 regions: N. Africa, S. Africa and S. America                        |
| Christen & Vogt, 2004          | 700 mm/yr         | lysimeter                                                       | for grassland near Basel, Switzerland                                                                     |
| Dirnbock & Grabner, 2000       | 180-270 mm/yr     | energy balance, model                                           | Carex firma and Sesleria-Carex sempervirens grassland                                                     |
| Dunin <i>et al.</i> , 1978     | 11 mm/yr          | resistance model                                                | Themeda Grassland in the Southern Tablelands region of New South Wales, Australia                         |
| Federov, 1977                  | 469 mm/yr (SD 28) | micrometeorological measurements, energy balance, lysimeters    | grassland at Usadievskiy Valdai station, Russia                                                           |
| Frank & Inouye, 1994           | 413 mm/yr         | model (Thornthwaite)                                            | shortgrass prairie, Nairobi Kenya                                                                         |
| Frank & Inouye, 1994           | 413 mm/yr         | model (Thornthwaite)                                            | shortgrass prairie, El Obeid, Sudan                                                                       |
| Frank & Inouye, 1994           | 413 mm/yr         | model (Thornthwaite)                                            | shortgrass prairie, Kimberley, South Africa                                                               |
| Frank & Inouye, 1994           | 413 mm/yr         | model (Thornthwaite)                                            | shortgrass prairie, Mopti, Mali                                                                           |
| Frank & Inouye, 1994           | 413 mm/yr         | model (Thornthwaite)                                            | shortgrass prairie, Pietersburg, South Africa                                                             |
| Frank & Inouye, 1994           | 413 mm/yr         | model (Thornthwaite)                                            | shortgrass prairie, Oktiabrskii, Ukraine                                                                  |
| Frank & Inouye, 1994           | 413 mm/yr         | model (Thornthwaite)                                            | shortgrass prairie, Orenburg, Russia                                                                      |
| Frank & Inouye, 1994           | 413 mm/yr         | model (Thornthwaite)                                            | shortgrass prairie, Rostov-na-donu, Russia                                                                |
| Frank & Inouye, 1994           | 413 mm/yr         | model (Thornthwaite)                                            | shortgrass prairie, Cheyenne, WY                                                                          |
| Frank & Inouye, 1994           | 413 mm/yr         | model (Thornthwaite)                                            | shortgrass prairie, Havre, MT                                                                             |
| Frank & Inouye, 1994           | 413 mm/yr         | model (Thornthwaite)                                            | shortgrass prairie, Lubbock, TX                                                                           |
| Frank & Inouye, 1994           | 413 mm/yr         | model (Thornthwaite)                                            | shortgrass prairie, Hobbs, NM                                                                             |
| Frank & Inouye, 1994           | 413 mm/yr         | model (Thornthwaite)                                            | shortgrass prairie, Rocky Ford, CO                                                                        |
| Frank & Inouye, 1994           | 571 mm/yr         | model (Thornthwaite)                                            | tallgrass prairie, 5 sites: 1) Clinton OK, 2) Crete NB, 3) Great Bend KS, 4) Lamberton MN, 5) Waterton SD |
| Frank & Inouye, 1994           | 571 mm/yr         | model (Thornthwaite)                                            | tallgrass prairie, Waterton SD                                                                            |
| Frank & Inouye, 1994           | 571 mm/yr         | model (Thornthwaite)                                            | tallgrass prairie, Clinton, OK                                                                            |
| Frank & Inouye, 1994           | 571 mm/yr         | model (Thornthwaite)                                            | tallgrass prairie, Crete, NB                                                                              |
| Frank & Inouye, 1994           | 571 mm/yr         | model (Thornthwaite)                                            | tallgrass prairie, Great Bend, KS                                                                         |

|                               |                               |                                                                  |                                                                                                   |
|-------------------------------|-------------------------------|------------------------------------------------------------------|---------------------------------------------------------------------------------------------------|
| Frank & Inouye, 1994          | 571 mm/yr                     | model (Thornthwaite)                                             | Tallgrass prairie, Lamberton, MN                                                                  |
| Gray, <i>et al.</i> , 1998    | 1360 mm/yr                    | n/a                                                              | Konza Prairie, eastern Kansas; unplowed                                                           |
| Gutowski <i>et al.</i> , 2002 | 1.84 mm/day                   | model                                                            | coupled Land-Atmosphere Simulation Program at the FIFE Konza Prairie site; C4 tallgrass prairie   |
| Hall & Harding, 1993          | 484, 460, 398, 395 mm/yr      | model; M(AZ11), Penman-Monteith                                  | two catchments in the Balquidder watershed                                                        |
| Hargreaves & Samani, 1986     | 1927 mm/yr                    | n/a                                                              | for grassland in Mali, 1960-1985                                                                  |
| Hoffman & Jackson, 2000       | 987 mm/yr                     | simulation with land surface model                               | cerrado, converted savannah to grassland, using GCM                                               |
| Hoffman & Jackson, 2000       | 1023 mm/yr                    | simulation with land surface model                               | llanos, converted savannah to grassland, using GCM                                                |
| Hoffman & Jackson, 2000       | 823 mm/yr                     | simulation with land surface model                               | northern Africa, converted savannah to grassland, using GCM                                       |
| Hoffman & Jackson, 2000       | 804 mm/yr                     | simulation with land surface model                               | southern Africa, converted savannah to grassland, using GCM                                       |
| Hoffman & Jackson, 2000       | 719 mm/yr                     | simulation with land surface model                               | Australia, converted savannah to grassland, using GCM                                             |
| Jackson <i>et al.</i> , 1998  | 230-358 mm/yr                 | simulated with water balance model based on 10 year weather data | annual C3 grasslands at Jasper Ridge Biological Preserve in Palo Alto, California                 |
| Kergoat <i>et al.</i> , 2002  | 883, 933, 891, 956, 923 mm/yr | global vegetation model                                          | grass / crops using CLIM, RAD, STOM, FERT, and MAX simulations                                    |
| Lewis, 1968                   | 378 mm/yr                     | water balance                                                    | grassland in Sierra Nevada foothills of California                                                |
| L'vovitch, 1979               | 360.0-361.0 mm/yr             | n/a                                                              | mowed virgin steppe, and for virgin steppe not mowed (observations during a 3-year period)        |
| L'vovitch, 1979               | 450 mm/yr                     | n/a                                                              | temperate steppes                                                                                 |
| Mahmood & Hubbard, 2002       | 694 mm/yr                     | soil water balance model                                         | pre-agricultural natural grass vegetation in tall grass - short grass transition in Nebraska, USA |
| Major, 1963                   | 101 mm/yr                     | Thornthwaite, soil water balance                                 | Ulan Bator, Mongolia, in the cold desert                                                          |
| Miyazaki <i>et al.</i> , 2004 | 117, 103 mm/yr                | badpass-covariance method, using gap-filled data                 | on grass field in old airport at Avraikheer; winter ET assumed to be 0                            |

|                                 |                                         |                                                                                                                          |                                                                                                                    |
|---------------------------------|-----------------------------------------|--------------------------------------------------------------------------------------------------------------------------|--------------------------------------------------------------------------------------------------------------------|
| Mocko & Sud, 1998               | 78.2, 75.1, 47.1, 60.3 W/m <sup>2</sup> | by energy balance methods (Penman, Priestley-Taylor, Mintz-Thornthwaite) and by SSiB (simplified simple biosphere model) | for globe, Wooded C4 grassland                                                                                     |
| Mocko & Sud, 1998               | 39.7, 38.4, 22.2, 33.5 W/m <sup>2</sup> | by energy balance methods (Penman, Priestley-Taylor, Mintz-Thornthwaite) and by SSiB (simplified simple biosphere model) | for globe, grassland                                                                                               |
| Mo <i>et al.</i> , 2004         | 635 mm/yr                               | process-based distributed model                                                                                          | grass, Lushi basin, China                                                                                          |
| Parton, Lauenroth & Smith, 1981 | 33.8 cm/yr                              | weighing lysimeter                                                                                                       | Pawnee site in northeastern Colorado; shortgrass steppe                                                            |
| Riou, 1984                      | 1070 mm/yr                              | n/a                                                                                                                      | Brazzaville, Congo, paspalum grass                                                                                 |
| Rockstrom <i>et al.</i> , 1999  | 410 mm/yr (range of 130-633 mm/yr)      | compilation of literature                                                                                                | mostly temperate cool grassland                                                                                    |
| Rockstrom <i>et al.</i> , 1999  | 655 mm/yr (range of 430-951 mm/yr)      | compilation of literature                                                                                                | temperate mountainous grassland                                                                                    |
| Rockstrom <i>et al.</i> , 1999  | 599 mm/yr (range of 403-862 mm/yr)      | compilation of literature                                                                                                | mostly tropical warm and hot grassland                                                                             |
| Rockstrom <i>et al.</i> , 1999  | 600 mm/yr (range of 402-798 mm/yr)      | compilation of literature                                                                                                | tropical mountainous grassland                                                                                     |
| Rockstrom <i>et al.</i> , 1999  | 416 mm/yr (range of 300-530 mm/yr)      | compilation of literature                                                                                                | woodland/ woody savannah                                                                                           |
| Rockstrom <i>et al.</i> , 1999  | 270 mm/yr (range of 225-315 mm/yr)      | compilation of literature                                                                                                | tropical dry shrubland                                                                                             |
| Rosenzweig, 1968                | log 2.79 mm/yr                          | model (Thornthwaite)                                                                                                     | tall grass prairie Norman OK, USA, Penfound, 1964                                                                  |
| Scott <i>et al.</i> , 2000      | 272 mm/yr                               | Bowen-Ratio Energy Balance, micrometeorological measurements, eddy covariance                                            | sacaton grass site in the semiarid riparian area of San Pedro River in southeastern Arizona                        |
| Sims, Singh & Laurenroth, 1978  | 158-729 mm/yr                           | n/a                                                                                                                      | 10 US Grasslands                                                                                                   |
| Smith-Carrington, 1983          | 640 mm/yr                               | n/a                                                                                                                      | Bua catchment, dambo grassland                                                                                     |
| Sumner, 1996                    | 680 mm/yr                               | eddy correlation, Penman Monteith                                                                                        | several methods, eddy correlation, penman Monteith, for grassland in central Florida, that was previously forested |
| Tattari & Ikonen, 1997          | 500 mm/yr                               | ASTIM model                                                                                                              | fields and treeless areas on moraine, Hietajärvi, Finland                                                          |
| Thompson <i>et al.</i> , 1981   | 430 mm/yr                               | n/a                                                                                                                      | grassland                                                                                                          |
| Tomlinson, 1996                 | 260 mm/yr                               | Bowen-Ratio Energy Balance, lysimeter, Penman-Monteith                                                                   | full canopy grassland site (Snively Basin), Spokane and Yakima County, Washington State, USA                       |

|                                  |                     |                                                              |                                                                                                                    |
|----------------------------------|---------------------|--------------------------------------------------------------|--------------------------------------------------------------------------------------------------------------------|
| Tomlinson, 1996                  | 233 mm/yr           | Bowen-Ratio Energy Balance, lysimeter, Penman-Monteith       | full canopy grassland site (Turnbull Meadow), Spokane and Yakima County, Washington State, USA                     |
| Tomlinson, 1996                  | 234 mm/yr           | Bowen-Ratio Energy Balance, lysimeter, Penman-Monteith       | sagebrush grassland (Black Rock Valley site), Spokane and Yakima County, Washington State, USA                     |
| Tomlinson, 1997                  | 417 mm/yr           | Bowen-Ratio Energy Balance, micrometeorological measurements | grassland, Bird Canyon, Washington State                                                                           |
| Tuvedendorzh & Myagmarzhav, 1985 | 190 mm/yr           | Budyko's method                                              | at Avraikheer                                                                                                      |
| Vertessy & Bessard, 1999         | 0.603 m/yr          | n/a                                                          | grassland in New South Wales, Australia                                                                            |
| Wever <i>et al.</i> , 2002       | 215, 250, 265 mm/yr | eddy covariance, energy balance, Priestley Taylor            | three grassland plots in southern Alberta; for northern temperate grassland; has not been grazed for over 20 years |
| Wright & Harding 1993            | 395-397 mm/yr       | weighting lysimeter                                          | Balquidder catchments in Wales, natural grassland, assuming minimal ET during snow season                          |
| Zakia, 1987                      | 480 mm/yr           | soil water balance                                           | Minas Gerais, Brazil, grassland                                                                                    |
| Zhang <i>et al.</i> , 1999       | 607 mm/yr           | n/a                                                          | grasslands in Australia                                                                                            |

Table S1.14. Annual evapotranspiration of closed shrubland

| Source                                                               | ET                                            | Method                                                                                               | Description                                                                                  |
|----------------------------------------------------------------------|-----------------------------------------------|------------------------------------------------------------------------------------------------------|----------------------------------------------------------------------------------------------|
| Flerchinger <i>et al.</i> , 1996<br>Flerchinger <i>et al.</i> , 2000 | 569 (+/- 3 mm), 505<br>(+/- 51 mm), 492<br>mm | Simultaneous Heat and Water Model (SHAW), detailed physical process model applied to 2 years of data | southwestern Idaho, mountain big sagebrush, using SHAW model and meteorological measurements |
| Hibbert, 1971                                                        | 418 mm/yr                                     | catchment water balance                                                                              | chaparral in Natural Drainage (A) catchment                                                  |
| Hibbert, 1971                                                        | 645 mm/yr                                     | catchment water balance                                                                              | chaparral in Three Bar (F) catchment                                                         |
| Hibbert, 1971                                                        | 515 mm/yr                                     | catchment water balance                                                                              | chaparral in White Spar catchment                                                            |
| Hibbert, 1971                                                        | 631 mm/yr                                     | catchment water balance                                                                              | chaparral in Three Bar (D) catchment                                                         |
| Hibbert, 1971; Hibbert, 1979                                         | 409 mm/yr                                     | catchment water balance                                                                              | chaparral in Natural Drainage (C) catchment                                                  |
| Lewis, 1968                                                          | 510 mm/yr                                     | water balance                                                                                        | oak woodland in Sierra Nevada foothills of California                                        |
| Major, 1963                                                          | 414 mm/yr                                     | Thornthwaite, soil water balance                                                                     | Cloverdale California, chaparral and woodland                                                |
| Poole <i>et al.</i> , 1981                                           | 395 mm/yr                                     | n/a                                                                                                  | chemise Chaparral, Echo Valley CA                                                            |

|                                |                                    |                           |                                                  |
|--------------------------------|------------------------------------|---------------------------|--------------------------------------------------|
| Poole <i>et al.</i> , 1981     | 475 mm/yr                          | n/a                       | mixed Chaparral, Echo Valley, CA                 |
| Rockstrom <i>et al.</i> , 1999 | 270 mm/yr (range of 225-315 mm/yr) | compilation of literature | tropical dry shrubland                           |
| Rosenzweig, 1968               | log 2.58 mm/yr                     | model (Thornthwaite)      | heath bald (leiophyllum) Great Smky Mtns TN, USA |
| Rosenzweig, 1968               | log 2.72, 2.69 mm/yr               | model (Thornthwaite)      | mixed heath, Great Smky Mtns TN, USA             |
| Rowe, 1963                     | 584 mm/yr                          | catchment water balance   | chaparral in Monroe Canyon catchment             |

Table S1.15. Annual evapotranspiration of open shrubland

| Source                                                               | ET                                      | Method                                                                                               | Description                                                                                                            |
|----------------------------------------------------------------------|-----------------------------------------|------------------------------------------------------------------------------------------------------|------------------------------------------------------------------------------------------------------------------------|
| Addison, 1977                                                        | 75 mm/yr                                |                                                                                                      | arctic semi-desert dominated by cushion plants, lichens and mosses, total plant cover 70-90 %                          |
| ADWR, 1991                                                           | 486, 756 mm/yr                          | Blaney-Criddle                                                                                       | dense and medium-dense mesquite, Sierra Vista sub watershed of the San Pedro River Basin, Arizona                      |
| Arkley, 1967                                                         | 7.7 in/yr                               | model (Thornthwaite)                                                                                 | assumed soil moisture capacity of 6 inches                                                                             |
| Bastiaanssen & Bandara, 2001                                         | 1,232 mm/yr                             | remote sensing                                                                                       | scrubland in Kirindi Oya, Sri Lanka                                                                                    |
| Bellot <i>et al.</i> , 1999                                          | 265.6 mm/yr                             | hydrological model, negative exponential approach                                                    | semi-arid Mediterranean area of Ventos (Alicante, Spain)                                                               |
| Bellot <i>et al.</i> , 1999                                          | 325.1 mm/yr                             | hydrological model, negative exponential approach                                                    | semi-arid Mediterranean area of Ventos (Alicante, Spain)                                                               |
| Berger, 2001                                                         | 4.07 - 5.73 ft/yr                       | Bowen-Ratio Energy-Balance, eddy correlation                                                         | meadow and grassland in Ruby Lake National Wildlife Refuge Area, Ruby Valley, northeastern Nevada                      |
| Carlson <i>et al.</i> , 1990                                         | 654 mm/yr                               | lysimeter                                                                                            | shrub and shrub with Mesquite; eastern ridge of Rolling Plains resource region, within a 16 ha livestock enclosure, TX |
| Dunn & Mackay, 1995                                                  | 411-473 (SD 25.5) mm/yr                 | model, based on Penman-Monteith with Rutter interception                                             | bracken (heaths and moorlands) in Tyne Basin in North East England                                                     |
| Flerchinger <i>et al.</i> , 1996<br>Flerchinger <i>et al.</i> , 2000 | 376 (+/- 3 mm), 338 (+/- 51 mm), 360 mm | Simultaneous Heat and Water Model (SHAW), detailed physical process model applied to 2 years of data | southwestern Idaho, low sagebrush, using SHAW model and meteorological measurements                                    |
| Franco-Vizcaino <i>et al.</i> , 2002                                 | 446 +/- 122 mm/yr                       | soil water balance, neutron probe, mini-lysimeters                                                   | wet meadow site                                                                                                        |

|                              |                                                             |                                                                                                                          |                                                                                                                                                                   |
|------------------------------|-------------------------------------------------------------|--------------------------------------------------------------------------------------------------------------------------|-------------------------------------------------------------------------------------------------------------------------------------------------------------------|
| Goetz & Shelton, 1990        | 33.9 in/yr                                                  | Bowen-ratio Energy Balance, micrometeorological measurements, and portable field chamber                                 | clover and weeds in Albuquerque, NM                                                                                                                               |
| Johnston, 1970               | 15.27 in/yr                                                 | soil water balance                                                                                                       | plot: 49% veg, 21% litter, 30% bare, located near head of Parrish Canyon on the Davis County Experimental Watershed near Bountiful, Utah, elevation 8400 feet asl |
| Kergoat <i>et al.</i> , 2002 | 237, 246, 253, 246, 253 mm/yr                               | global vegetation model                                                                                                  | Mediterranean vegetation / shrublands using CLIM, RAD, STOM, FERT, and MAX simulations                                                                            |
| Lacznia <i>et al.</i> , 1999 | 1.88 feet/yr                                                | Walker & Eakin (1963)                                                                                                    | has a high concentration of springs; mixed grassland and shrubland vegetation in the North-Central Mojave Desert                                                  |
| Lacznia <i>et al.</i> , 1999 | 1.92 feet/yr                                                | Walker & Eakin (1963)                                                                                                    | has a high concentration of springs; mixed grassland and shrubland vegetation in the North-Central Mojave Desert                                                  |
| Lacznia <i>et al.</i> , 1999 | 0.62 feet/yr                                                | Walker & Eakin (1963)                                                                                                    | has a high concentration of springs; mixed grassland and shrubland vegetation in the North-Central Mojave Desert                                                  |
| Lane <i>et al.</i> , 1984    | 158 mm (SD 52 mm)/yr                                        | continuous simulation model, micrometeorological measurements                                                            | perennial vegetation in the northern Mojave Desert                                                                                                                |
| Major, 1963                  | 123 mm/yr                                                   | Thornthwaite, soil water balance                                                                                         | Yeringon, Nevada, USA, Great Basin shrub steppe                                                                                                                   |
| Major, 1963                  | 250 mm/yr                                                   | Thornthwaite, soil water balance                                                                                         | Ellery Lake, California, USA at timberline (3230 m elevation); assuming 100 mm available soil moisture storage capacity                                           |
| Major, 1963                  | 226 mm/yr                                                   | Thornthwaite, soil water balance                                                                                         | Ellery Lake, California, USA at Dana Plateau (3770 m elevation); assuming 100 mm available soil moisture storage capacity                                         |
| Major, 1963                  | 180 mm/yr                                                   | Thornthwaite, soil water balance                                                                                         | White Mountains, California, USA (3800 m elevation); assuming 100 mm available soil moisture storage capacity                                                     |
| Major, 1963                  | 273 mm/yr                                                   | Thornthwaite, soil water balance                                                                                         | xeric scrublands near Alice Springs, Australia                                                                                                                    |
| Mocko & Sud, 1998            | 19.1, 19, 7.7, 17.7, 17.4, 14.2, 10.5, 7.3 W/m <sup>2</sup> | by energy balance methods (Penman, Priestley-Taylor, Mintz-Thornthwaite) and by SSiB (simplified simple biosphere model) | for globe, Broadleaf shrubs with bare soil, Broadleaf shrubs with groundcover                                                                                     |
| Mo <i>et al.</i> , 2004      | 640 mm/yr                                                   | process-based distributed model                                                                                          | dwarf shrublands, Lushi basin, China                                                                                                                              |
| Nichols, 2000                | 0.577 feet, 0.690 feet/yr                                   | Bowen Ratio Energy Balance                                                                                               | barren land, shrubs and saltgrass, 12 Great Basin study sites, Nevada, USA                                                                                        |

|                                |                                              |                                                                                          |                                                                                                                                                                                                                                                                                                                                                                               |
|--------------------------------|----------------------------------------------|------------------------------------------------------------------------------------------|-------------------------------------------------------------------------------------------------------------------------------------------------------------------------------------------------------------------------------------------------------------------------------------------------------------------------------------------------------------------------------|
| Poole <i>et al.</i> , 1981     | 530 mm/yr                                    | n/a                                                                                      | matorral in Funda Santa                                                                                                                                                                                                                                                                                                                                                       |
| Raymond & Rezin, 1989          | 2.36 feet/yr                                 | remote sensing, water use rates                                                          | phreatophytes in southern Arizona                                                                                                                                                                                                                                                                                                                                             |
| Roberts, 1998                  | 377-482 mm/yr                                | empirical relations                                                                      | dry moorland                                                                                                                                                                                                                                                                                                                                                                  |
| Rockstrom <i>et al.</i> , 1999 | 270 mm/yr (range of 225-315 mm/yr)           | compilation of literature                                                                | tropical dry shrubland                                                                                                                                                                                                                                                                                                                                                        |
| Rosenzweig, 1968               | log 2.37 mm/yr                               | model (Thornthwaite)                                                                     | alpine moist tundra Mt. Washington NH, USA                                                                                                                                                                                                                                                                                                                                    |
| Rosenzweig, 1968               | log 2.25 mm/yr                               | model (Thornthwaite)                                                                     | cheatgrass Hanford Reservation, WA                                                                                                                                                                                                                                                                                                                                            |
| Scott <i>et al.</i> , 2000     | 375 mm/yr                                    | Bowen-Ratio Energy Balance, micrometeorological measurements                             | mesquite site in the semiarid riparian area of San Pedro River in southeastern Arizona                                                                                                                                                                                                                                                                                        |
| Sharpe, 1970                   | 343.54 (1910), 384 mm/yr (avg for 1911-1920) | measured at site, and model (Thornthwaite)                                               | Sill Mine, Colorado, 3510 metres at lower end of plateau, 1/2 mile from foot of high mountains, and just at the edge of timberline, in Clear Creek County, Colorado. For plot, PE is counted as zero when mean temperature is below 0oC. For catchment estimate, assumed 100 mm of available soil moisture storage capacity, and includes snow evaporation estimate of 50 mm. |
| Sharpe, 1970                   | 268 (SD 26) mm/yr                            | measured at site, and model (Thornthwaite)                                               | station D-1, Nitwot Ridge, Front Range, Colorado; assumed 100 mm of available soil moisture storage capacity; alpine tundra                                                                                                                                                                                                                                                   |
| Sharpe, 1970                   | 275 (SD 45) mm/yr                            | measured at site, and model (Thornthwaite)                                               | Corona Pass, Front Range, Colorado; assumed 100 mm of available soil moisture storage capacity; alpine tundra                                                                                                                                                                                                                                                                 |
| Sharpe, 1970                   | 335 (SD 30) mm/yr                            | measured at site, and model (Thornthwaite)                                               | Pike's Peak Timberline, Colorado; assumed 100 mm of available soil moisture storage capacity; timberline                                                                                                                                                                                                                                                                      |
| Sharpe, 1970                   | 317 (SD 41) mm/yr                            | measured at site, and model (Thornthwaite)                                               | average alpine timberline climate based on six high elevation weather station-pairs in Colorado USA                                                                                                                                                                                                                                                                           |
| Tomlinson, 1997                | 352, 372, 199, 469 mm/yr                     | Bowen-ratio Energy Balance, micrometeorological measurements, Penman Monteith, lysimeter | sagebrush, Black Rock Valley, Washington State                                                                                                                                                                                                                                                                                                                                |
| Unland <i>et al.</i> , 1998    | 0.848 m/yr                                   | Bowen-ratio Energy Balance, micrometeorological measurements                             | medium / high density vegetation of medium height (primarily facultative phreatophytes, especially mesquite bosque) in Santa Cruz River in southern Arizona                                                                                                                                                                                                                   |

Table S1.16. Annual evapotranspiration of Tundra

| Source                                                                                                                                                          | ET                       | Method                                                                     | Description                                                                                                                    |
|-----------------------------------------------------------------------------------------------------------------------------------------------------------------|--------------------------|----------------------------------------------------------------------------|--------------------------------------------------------------------------------------------------------------------------------|
| Choudhury <i>et al.</i> , 1998                                                                                                                                  | 220 mm/yr                | biophysical process-based model with satellite & ancillary data            | tundra                                                                                                                         |
| Choudhury <i>et al.</i> , 1998                                                                                                                                  | 171 mm/yr                | biophysical process-based model with satellite & ancillary data            | tundra                                                                                                                         |
| Choudhury <i>et al.</i> , 1998                                                                                                                                  | 262 mm/yr                | biophysical process-based model with satellite & ancillary data            | tundra                                                                                                                         |
| Choudhury <i>et al.</i> , 1998                                                                                                                                  | 193 mm/yr                | biophysical process-based model with satellite & ancillary data            | tundra                                                                                                                         |
| Frank & Inouye, 1994                                                                                                                                            | 202 mm/yr                | model (Thornthwaite)                                                       | tundra in Baker Lake Canada                                                                                                    |
| Frank & Inouye, 1994                                                                                                                                            | 202 mm/yr                | model (Thornthwaite)                                                       | tundra in Hall Beach Canada                                                                                                    |
| Frank & Inouye, 1994                                                                                                                                            | 202 mm/yr                | model (Thornthwaite)                                                       | tundra in Mould Bay Canada                                                                                                     |
| Frank & Inouye, 1994                                                                                                                                            | 202 mm/yr                | model (Thornthwaite)                                                       | tundra in Resolute Canada                                                                                                      |
| Frank & Inouye, 1994                                                                                                                                            | 202 mm/yr                | model (Thornthwaite)                                                       | tundra in Sachs Harbour, Canada                                                                                                |
| Frank & Inouye, 1994                                                                                                                                            | 202 mm/yr                | model (Thornthwaite)                                                       | tundra in Barrow, AK                                                                                                           |
| Frank & Inouye, 1994                                                                                                                                            | 202 mm/yr                | model (Thornthwaite)                                                       | tundra in Bethel AK                                                                                                            |
| Frank & Inouye, 1994                                                                                                                                            | 202 mm/yr                | model (Thornthwaite)                                                       | tundra in King Salmon AK                                                                                                       |
| Frank & Inouye, 1994                                                                                                                                            | 202 mm/yr                | model (Thornthwaite)                                                       | tundra in Kotzebue AK                                                                                                          |
| Frank & Inouye, 1994                                                                                                                                            | 202 mm/yr                | model (Thornthwaite)                                                       | tundra in Nome AK                                                                                                              |
| <div style="border: 1px solid black; padding: 2px;">                     Hinzman, 1990<br/>                     Kane <i>et al.</i>, 1990                 </div> | 153, 130, 219, 240 mm/yr | water balance method; pan evaporation, energy balance and Priestley Taylor | 2.2 km <sup>2</sup> Imnavait watershed, Alaska; tussock sedges and mosses, lichens and shrubs (willows, alder and dwarf birch) |



|                              |                              |                                                                                    |                                                                                                                                                                                                                                                                               |
|------------------------------|------------------------------|------------------------------------------------------------------------------------|-------------------------------------------------------------------------------------------------------------------------------------------------------------------------------------------------------------------------------------------------------------------------------|
| Kane, <i>et al.</i> , 1990   | 153, 130, 219, 240 mm/yr     | site water balance, pan, energy balance, Priestley-Taylor                          | no ET estimate for winter; Arctic North slope of Alaska. vegetation is primarily water tolerant plants such as sedge tussocks and mosses, but they are accompanied by lichens and shrubs such as willow, alder and dwarf birch; Imnavait Creek, 2.2 km <sup>2</sup> watershed |
| Kergoat <i>et al.</i> , 2002 | 97, 121, 106, 141, 126 mm/yr | global vegetation model                                                            | tundra using CLIM, RAD, STOM, FERT, and MAX simulations                                                                                                                                                                                                                       |
| Major, 1963                  | 104 mm/yr                    | Thornthwaite, soil water balance                                                   | Barrow Alaska, USA, coastal tundra                                                                                                                                                                                                                                            |
| Mather & Yoshioka, 1966      | 380 mm/yr                    | n/a                                                                                | along timberline in Canada                                                                                                                                                                                                                                                    |
| Maykut & Church, 1973        | 72 mm/yr                     | water balance                                                                      | tundra in Point Barrow                                                                                                                                                                                                                                                        |
| Miller, 1983                 | 175 mm/yr                    | n/a                                                                                | low arctic shrub                                                                                                                                                                                                                                                              |
| Miller, 1983                 | 200 mm/yr                    | n/a                                                                                | tall arctic shrubland                                                                                                                                                                                                                                                         |
| Ohmura, 1982                 | 140 mm/yr                    | aerodynamic Methods, snow lysimeter, Bowen Ratio Energy Balance                    | arctic tundra on Axel Heiberg Island                                                                                                                                                                                                                                          |
| Petrone <i>et al.</i> , 2000 | 168 mm/yr                    | Bowen-Ratio Energy Balance, eddy correlation using a vertical propeller anemometer | western subarctic dry site on tundra plateau 56 km northeast of Inuvik, NWT, Canada; assume no ET during winter months in subarctic                                                                                                                                           |
| Rosenzweig, 1968             | log 2.30 mm/yr               | model (Thornthwaite)                                                               | arctic moist tundra Cape Thompson AK, USA                                                                                                                                                                                                                                     |
| Stuart <i>et al.</i> , 1982  | 125 mm/yr                    | n/a                                                                                | tussock tundra, common in AK and former USSR, infrequent in Canada                                                                                                                                                                                                            |

Table S1.17. Annual evapotranspiration of barren or sparsely vegetated lands

| Source                       | ET           | Method                                                     | Description                                                                                             |
|------------------------------|--------------|------------------------------------------------------------|---------------------------------------------------------------------------------------------------------|
| Allison & Barnes, 1983       | 63 mm/yr     | DT                                                         | Lake Fromme, a normally dry salt lake                                                                   |
| Allison & Barnes, 1985       | 63-170 mm/yr | isotopic and chloride profiles in sediments, and deuterium | Lake Fromme, a normally dry salt lake in Central Australia                                              |
| Bellot <i>et al.</i> , 1999  | 262.1 mm/yr  | hydrological model, negative exponential approach          | semi-arid Mediterranean area of Ventos (Alicante, Spain)                                                |
| Berger <i>et al.</i> , 2001  | 0.95 feet/yr | Bowen Ratio energy balance, eddy correlation               | playa and bare soil in Ruby Lake National Wildlife Refuge Area, Ruby Valley, North-eastern Nevada       |
| Carlson <i>et al.</i> , 1990 | 576 mm/yr    | lysimeter                                                  | bare land on eastern ridge of Rolling Plains resource region, within a 16 ha livestock enclosure, Texas |

|                               |             |                                                                                      |                                                                                                                                                        |
|-------------------------------|-------------|--------------------------------------------------------------------------------------|--------------------------------------------------------------------------------------------------------------------------------------------------------|
| Cochran <i>et al.</i> , 1988  | 10 mm/yr    | lysimeter                                                                            | Owens (Dry) lake playa evaporation                                                                                                                     |
| Dirnbock & Grabherr, 2000     | 0-180 mm/yr | compilation of literature, modelling according to Turc-Wendling energy balance model | vegetation on rocky slopes and initial alpine vegetation in Austrian Alps                                                                              |
| Frank & Inouye, 1994          | 164 mm/yr   | Thornthwaite model                                                                   | Hot desert, Parker, Arizona                                                                                                                            |
| Frank & Inouye, 1994          | 164 mm/yr   | Thornthwaite model                                                                   | Hot desert, Victorville, California                                                                                                                    |
| Frank & Inouye, 1994          | 164 mm/yr   | Thornthwaite model                                                                   | Hot desert, Helwan, Egypt                                                                                                                              |
| Frank & Inouye, 1994          | 164 mm/yr   | Thornthwaite model                                                                   | Hot desert, Wadi Halfa, Sudan                                                                                                                          |
| Frank & Inouye, 1994          | 164 mm/yr   | Thornthwaite model                                                                   | Hot desert, Alice Springs, Australia                                                                                                                   |
| Frank & Inouye, 1994          | 164 mm/yr   | Thornthwaite model                                                                   | Hot desert, Meekatharra, Australia                                                                                                                     |
| Frank & Inouye, 1994          | 164 mm/yr   | Thornthwaite model                                                                   | Hot desert, El Paso Texas                                                                                                                              |
| Frank & Inouye, 1994          | 164 mm/yr   | Thornthwaite model                                                                   | Hot desert, Imperial California                                                                                                                        |
| Frank & Inouye, 1994          | 164 mm/yr   | Thornthwaite model                                                                   | Hot desert, Mendoza Argentina                                                                                                                          |
| Frank & Inouye, 1994          | 164 mm/yr   | Thornthwaite model                                                                   | Hot desert, Pheonix, Arizona                                                                                                                           |
| Frank & Inouye, 1994          | 164 mm/yr   | Thornthwaite model                                                                   | Hot desert, Chihuahua Mexico                                                                                                                           |
| Frank & Inouye, 1994          | 256 mm/yr   | Thornthwaite model                                                                   | Cold desert, Astrahan, Russia                                                                                                                          |
| Frank & Inouye, 1994          | 256 mm/yr   | Thornthwaite model                                                                   | Cold desert, Yan'an, China                                                                                                                             |
| Frank & Inouye, 1994          | 256 mm/yr   | Thornthwaite model                                                                   | Cold desert, Elko, Nevada                                                                                                                              |
| Frank & Inouye, 1994          | 256 mm/yr   | Thornthwaite model                                                                   | Cold desert, Ephrata, Washington, USA                                                                                                                  |
| Frank & Inouye, 1994          | 256 mm/yr   | Thornthwaite model                                                                   | Cold desert, Idaho Falls, Idaho                                                                                                                        |
| Frank & Inouye, 1994          | 256 mm/yr   | Thornthwaite model                                                                   | Cold desert, Milton Freewater, Oregon                                                                                                                  |
| Frank & Inouye, 1994          | 256 mm/yr   | Thornthwaite model                                                                   | Cold desert, Nyssa, Oregon                                                                                                                             |
| Frank & Inouye, 1994          | 256 mm/yr   | Thornthwaite model                                                                   | Cold desert, Cipoletti, Argentina                                                                                                                      |
| Frank & Inouye, 1994          | 256 mm/yr   | Thornthwaite model                                                                   | Cold desert, Sarmiento, Argentina                                                                                                                      |
| Gohre, 1949                   | 178 mm/yr   | lysimeter                                                                            | bare soil in Eberswalde, Germany                                                                                                                       |
| Henning, 1989                 | 5 cm/yr     | energy balance                                                                       | desert area value from atlas                                                                                                                           |
| Johnston <i>et al.</i> , 1969 | 270 mm/yr   |                                                                                      | barren land in Utah, 1950-1953                                                                                                                         |
| Johnston, 1970                | 11.28 in/yr | soil water balance                                                                   | bare soil plot located near head of Parrish Canyon on the Davis County Experimental Watershed near Bountiful, Utah, elevation 8400 feet asl, 1962-1966 |

|                               |                                     |                                                                                                                          |                                                                                                                                                                  |
|-------------------------------|-------------------------------------|--------------------------------------------------------------------------------------------------------------------------|------------------------------------------------------------------------------------------------------------------------------------------------------------------|
| Kane <i>et al.</i> , 1990     | 153, 130, 219, 240 mm/yr            | water balance over the water year, checked by energy balance, Priestly Taylor                                            | Imnavait Creek, a 2.2 km <sup>2</sup> watershed underlain by continuous permafrost in the Arctic North Slope of Alaska, assume minimal evaporation during winter |
| Liu & Kotoda, 1998            | 99.4 mm/yr                          | Kotoda 1986 and Advection-Aridity (Brutsaert and Stricket, 1979) models, eddy correlation                                | Gobi Desert, NW China, middle part of Hexi corridor; coarse sand and small pebbles with sparse scrub vegetation                                                  |
| Lopes 1986                    | 10 mm/yr                            | lysimeter                                                                                                                | Owens (Dry) lake playa evaporation                                                                                                                               |
| Major, 1963                   | 101 mm/yr                           | Thornthwaite model                                                                                                       | Blythe California, in the hot Sonoran desert                                                                                                                     |
| Major, 1963                   | 69 mm/yr                            | Thornthwaite model                                                                                                       | Dzamyn-Ude, Mongolia, in desert                                                                                                                                  |
| Major, 1963                   | 89 mm/yr                            | Thornthwaite model                                                                                                       | hot desert near Jacobabad, Pakistan                                                                                                                              |
| Malek <i>et al.</i> , 1990    | 229 mm/yr                           | micrometeorological measurements, Bowen-Ratio energy balance                                                             | margin and moist playa in eastern Utah                                                                                                                           |
| Miller, 1983                  | 75 mm/yr                            |                                                                                                                          | Polar Desert: plant cover 1-2% of surface                                                                                                                        |
| Mocko & Sud, 1998             | 6.9, 6.8, 2.3, 6.2 W/m <sup>2</sup> | by energy balance methods (Penman, Priestley-Taylor, Mintz-Thornthwaite) and by SSiB (simplified simple biosphere model) | for globe, bare soil                                                                                                                                             |
| Reynolds <i>et al.</i> , 2000 | 22.8 cm/yr                          | Patch arid land simulator (PALS-FT)                                                                                      | Chihuahuan Desert, Jordana LTER, New Mexico                                                                                                                      |
| Rosenzweig, 1968              | log 2.10 mm/yr                      | Thornthwaite model                                                                                                       | Creosote bush desert Nye Co, NV, USA                                                                                                                             |
| Rosenzweig, 1968              | log 2.34 mm/yr                      | Thornthwaite model                                                                                                       | Cool desert sand dunes, near Rexburg, ID                                                                                                                         |
| Sammis & Gay, 1979            | 259, 231, 242 mm/yr                 | weighing lysimeter                                                                                                       | three sites in the Sonoran desert near Tuscon AZ: a large creosote bush, an adjacent stand of creosote bush, and bare soil plots.                                |
| Tyler <i>et al.</i> , 1997    | 88 (+/- 22) mm/yr                   | eddy correlation, microlysimeters, solute profiling methods                                                              | salt cemented sand on abandoned lake bed, groundwater near surface                                                                                               |
| Ullman, 1985                  | 9-28 mm/yr                          | solute profiling methods                                                                                                 | salt-crusted surface of Lake Eyre in south-central Australia, in a dry period; low rate of evaporation was attributed to the reduced albedo of the salt surface  |
| Unland <i>et al.</i> , 1996   | 230, 262 mm/yr                      | micrometeorological measurements, eddy correlation, BATS model                                                           | Sonoran desert near Tuscon, Arizona                                                                                                                              |
| Unland <i>et al.</i> , 1996   | 0.157 m/yr                          | micrometeorological measurements, Bowen-Ratio energy balance                                                             | cottonwood in riparian area of Santa Cruz River in southern Arizona                                                                                              |
| Weltz & Blackburn, 1995       | 645 mm/yr                           | lysimeter                                                                                                                | bare soil La Copita Research Area, eastern Rio Grande plain of Texas                                                                                             |

Table S1.18. Annual Evapotranspiration of Wetlands ( $ET_w$ )

| Source                                | ET                         | Method                                        | Notes                                                                                                                            |
|---------------------------------------|----------------------------|-----------------------------------------------|----------------------------------------------------------------------------------------------------------------------------------|
| Ablew, 1996                           | 3.6 mm/day                 | water balance, lysimeter                      | constructed wetlands; cattail, mixed marsh vegetation, open water                                                                |
| ADWR, 1991                            | 1271-1198 mm/yr            | Blaney-Cridde                                 | riparian area in the San Pedro River Basin, Sierra Vista sub watershed                                                           |
| Balek, 1977                           | 2180 mm/yr                 | n/a                                           | Bangweulu swamp in Luapula catchment of the Upper Congo (Zaire)                                                                  |
| Balek, 1977                           | 1005 mm/yr                 | n/a                                           | Kafue Flats, in Zambezi river, in Zambia                                                                                         |
| Bawazir <i>et al.</i> , 2004          | 3222 MJ/m <sup>2</sup> /yr | eddy covariance                               | riparian saltcedar, along Rio Grande River                                                                                       |
| Berger, 2001                          | 50.24 in/yr                | Bowen Ratio - Energy Balance, eddy covariance | moderate to dense cover of bulrush marsh Ruby Lake National Wildlife Refuge Area, Ruby Valley, Northeastern Nevada               |
| Bidlake <i>et al.</i> , 1996          | 970-990 mm/yr              | Bowen Ratio - Energy Balance                  | cypress swamp and marsh in west-central Florida                                                                                  |
| Cleverly <i>et al.</i> , 2002         | 122 cm/yr                  | eddy covariance                               | Tamarix ramosissima; for site at Bosque del apache National Wildlife Refuge, flooded site; Rio Grande riparian areas, New Mexico |
| Culler <i>et al.</i> , 1982           | 1090 mm/yr                 | soil water balance                            | phreatophytes                                                                                                                    |
| Dolan <i>et al.</i> , 1984            | 131.7 cm/yr                | using diurnal water-table fluctuation method  | Palatkaha watershed swamp, Florida; mixed emergent aquatic macrophyte community                                                  |
| Eaton & Rouse, 2001                   | 198 mm                     | soil water balance, energy balance            | Assuming minimal ET in winter. For a subarctic sedge fen                                                                         |
| Ewel & Smith, 1992                    | 38, 60, 86 cm/yr           | water balance                                 | range 38 - 86 cm/yr                                                                                                              |
| Fieldler & Sommer, 2004               | 500-800 mm/yr              | micrometeorological measurements              | natural wetlands in the Allgau region of southwest Germany                                                                       |
| Finnish Environmental Institute, 2004 | 300-350 mm/yr              | n/a                                           | wetland forest in River Simojoki basin, Northern Boreal zone in Finland                                                          |
| Gatewood <i>et al.</i> , 1950         | 1.829 m/yr                 | water balance                                 | in lower Gila River valley, riparian water use estimates                                                                         |
| German & Sumner, 2001                 | 43.5 and 55.7 in/yr        | micrometeorological measurements              | meteorological methods, one for a blue cypress marsh and one for everglades national park                                        |

|                               |                                                      |                                                                                    |                                                                                                                                      |
|-------------------------------|------------------------------------------------------|------------------------------------------------------------------------------------|--------------------------------------------------------------------------------------------------------------------------------------|
| German, 2000                  | 45.7, 45.4, 47.9, 48.5, 50.4, 42.1, 42.5 in/yr       | Bowen Ratio - Energy Balance                                                       | 7 sites in the Everglades, ranging from cattails to sawgrass and rushes                                                              |
| German, ER, unpublished       | 43.73, 45.68, 50.05, 46.0, 50.50, 43.44, 42.78 in/yr | Bowen Ratio - Energy Balance                                                       | 7 sites in the Everglades, ranging from cattails to sawgrass and rushes                                                              |
| Hicks <i>et al.</i> , 2001    | 350-500 mm/yr                                        | estimate from other ET estimates                                                   | paper states that there are no known ETw measurements in NZ                                                                          |
| Hughes <i>et al.</i> , 2001   | 700 mm/yr                                            | eddy covariance, Pan Evaporation, Penman-Monteith                                  | small eddy correlation dataset, for Kikuyu grass wetlands                                                                            |
| Hurst, 1952                   | 6.5 mm/day                                           | atmometer                                                                          | oases                                                                                                                                |
| Hurst, 1952                   | 6.1 mm/day                                           | water balance                                                                      | swamps near Lake Kyoga                                                                                                               |
| Knowles, 1996                 | 37.9 and 37.6 in/yr                                  | regional water budget, modified Priestley Taylor model, Eddy Correlation           | Rainbow Springs and Silver Springs basins in North Central Florida                                                                   |
| Koranda <i>et al.</i> , 1978  | 185 mm/yr                                            | n/a                                                                                | wet meadow: sedge moss, dominates coastal plain of Alaska and former USSR, limited presence in sub arctic                            |
| Krestovsky, 1969b             | 490 mm/yr                                            | n/a                                                                                | marshy areas in southern Taiga subzone of former USSR                                                                                |
| Laczniak <i>et al.</i> , 1999 | 2.6 feet                                             | Walker and Eakin (1963)                                                            | Bole Spring, Ash Meadows Area, Nye County, Nevada                                                                                    |
| Laczniak <i>et al.</i> , 1999 | 3.44 feet                                            | Walker and Eakin (1963)                                                            | Carson Meadow, dense wetland vegetation, Ash Meadows Area, Nye County, Nevada                                                        |
| Laczniak <i>et al.</i> , 1999 | 3.73 feet                                            | Walker and Eakin (1963)                                                            | Fairbanks meadow, dense grassland, intermittently flooded, Ash Meadows Area, Nye County, Nevada; based on less than one year of data |
| Laczniak <i>et al.</i> , 1999 | 3.91 feet                                            | Walker and Eakin (1963)                                                            | Fairbanks swamp dense wetland vegetation, Ash Meadows Area, Nye County, Nevada                                                       |
| Laczniak <i>et al.</i> , 1999 | 2.58 feet                                            | Walker and Eakin (1963)                                                            | Lower Crystal Flat, flooded bare soils with some grass, Ash Meadows Area, Nye County, Nevada                                         |
| Laczniak <i>et al.</i> , 1999 | 3.23 feet                                            | Walker and Eakin (1963)                                                            | flooded grassland, Rogers Spring, Ash Meadows Area, Nye County, Nevada                                                               |
| Liu <i>et al.</i> , 1998      | 974 (+/- 86) mm/yr                                   | model with field micrometeorological measurements, eddy correlation, class A pans, | cypress wetlands in industrial forest lands of the Georgia-Pacific Corporation                                                       |

|                                |                               |                                                                                     |                                                                                                                                                                                             |
|--------------------------------|-------------------------------|-------------------------------------------------------------------------------------|---------------------------------------------------------------------------------------------------------------------------------------------------------------------------------------------|
| Mao, 2002                      | 3.21, 3.25, 3.66, 3.53 mm/day | lysimeter, pan, micrometeorological measurements, Penman Monteith, Priestley Taylor | areas dominated by wetland vegetation; St. Johns River Basin                                                                                                                                |
| Miller, 1983                   | 240 mm/yr                     | n/a                                                                                 | peatlands in arctic areas                                                                                                                                                                   |
| Nature Consultants, 2004       | 437 mm/yr                     | n/a                                                                                 | average wetland ET for Ireland                                                                                                                                                              |
| Nijssen & Lettenmaier, 2002    | 489, 502, 496 mm/yr           | eddy covariance, Bowen-Ratio Energy Balance, Penman Monteith                        | extrapolation of eddy correlation and bowen ratio methods to basin using Penman-Monteith combination equation and LAI weighted versions of multiple regression models; for fen              |
| Olivier, 1961                  | 4.7 mm/day                    | n/a                                                                                 | swamp around Soroti near the northern shore of Lake Kyoga                                                                                                                                   |
| Oyebande & Balek, 1989         | 1075 mm/yr                    | n/a                                                                                 | dambo wetland in Zambia                                                                                                                                                                     |
| Petrone <i>et al.</i> , 2000   | 218 mm/yr                     | Bowen Ratio Energy Balance, eddy correlation using a vertical propeller anemometer  | northern Canada, high subarctic wetland tundra region near the shores of Hudson Bay, in central subarctic 26 km east of Churchill, Manitoba; assume no ET during winter months in subarctic |
| Petrone <i>et al.</i> , 2000   | 216 mm/yr                     | Bowen Ratio Energy Balance, eddy correlation using a vertical propeller anemometer  | northern Canada, western subarctic wetland tundra 56 km northeast of Inuvik, NWT; assume no ET during winter months in subarctic                                                            |
| Porcher, 1981                  | 1011 mm/yr                    | n/a                                                                                 | Francis-Beidler Forest, Four Holes Swamp in Coastal Plain of South Carolina                                                                                                                 |
| Roberts, 1998                  | 320-407 mm/yr                 | empirical relations                                                                 | wet moorland                                                                                                                                                                                |
| Rockstrom <i>et al.</i> , 1999 | 221 (range 200-260) mm/yr     | compilation of secondary                                                            | 3 literature sources; for "boreal bog"                                                                                                                                                      |
| Rockstrom <i>et al.</i> , 1999 | 674 (range 456-1020) mm/yr    | compilation of secondary                                                            | 4 literature sources; for "temperate bog"                                                                                                                                                   |
| Rockstrom <i>et al.</i> , 1999 | 843 (range 670-720) mm/yr     | compilation of secondary                                                            | 3 literature sources; for "temperate swamp"                                                                                                                                                 |
| Rockstrom <i>et al.</i> , 1999 | 1127 (range 930-1277) mm/yr   | compilation of secondary                                                            | 5 literature sources; for "subtropical swamp"                                                                                                                                               |
| Rockstrom <i>et al.</i> , 1999 | 1656 (range 1408-1904) mm/yr  | compilation of secondary                                                            | 1 literature source; for "tropical swamp" (low / high values are based on the mean +/- 15%)                                                                                                 |
| Romanov, 1968                  | 331 mm/yr                     | thermal balance method                                                              | sphagnum bogs with dwarf shrubs                                                                                                                                                             |
| Romanov, 1968                  | 410 mm/yr                     | thermal balance method                                                              | entire bog catchment area                                                                                                                                                                   |

|                     |                      |                                                              |                                                                                                                                            |
|---------------------|----------------------|--------------------------------------------------------------|--------------------------------------------------------------------------------------------------------------------------------------------|
| Romanov, 1968       | 411 (SD 29 mm) mm/yr | thermal balance method                                       | lowmoor bogs                                                                                                                               |
| Roulet & Woo, 1986  | 217 mm/yr            | n/a                                                          | wetland in Baker Lake, NWT; assuming no evaporation during snow period                                                                     |
| Rouse, 2000         | 400 mm/yr            | energy balance                                               |                                                                                                                                            |
| Shahin, 1985        | 4.1 mm/day           | n/a                                                          | Machar Swamps in the Sobat Basin, Ethiopia                                                                                                 |
| Sharma, 1988        | 1800 mm/yr           | n/a                                                          | Lukanga swamp, Zambia                                                                                                                      |
| Stewart, 1989       | 3.5 mm/day           | remote sensing and micrometeorological measurements          | Chizengeni dambo, in the Nyatsime catchment                                                                                                |
| Sumner, 2002        | 1314-1416 mm/yr      | eddy covariance                                              | 2 year period, sawgrass peat marsh marshes in Florida, measured before, during and after two droughts, sites were burned at one point      |
| Tomlinson, 1996     | 434.1 (+ 11) mm/yr   | Bowen-Ratio Energy Balance, Penman Monteith, lysimeter       | missing one month data, added min monthly value as estimate; meadow site Turnbull Meadow, Spokane and Yakima County, Washington State, USA |
| UNEP, 1992          | 2400mm/yr            | n/a                                                          | wetlands of the river Niger                                                                                                                |
| Unland et al., 1998 | 1.697 m/yr           | Bowen-Ratio Energy Balance, micrometeorological measurements | for riparian area of Santa Cruz River in southern Arizona                                                                                  |

Table S1.19. Global annual terrestrial evapotranspiration (*TE*)

| Source                          | TET                        | Notes                                                                                                                                                                                                                                                   |
|---------------------------------|----------------------------|---------------------------------------------------------------------------------------------------------------------------------------------------------------------------------------------------------------------------------------------------------|
| Arora & Boer, 2002              | 461 mm/yr                  | GCM based analysis of temperature variation in soil moisture                                                                                                                                                                                            |
| Arora, 2001                     | 73,000 km <sup>3</sup> /yr | AMIPII Run of 3rd Generation General Circulation Model of the Canadian Centre for Climate Modelling and Analysis                                                                                                                                        |
| Baumgartner & Reichel, 1975     | 71,000 km <sup>3</sup> /yr | distribution maps of actual ET according to Thornthwaite, and on determined difference between runoff and precipitation for individual river basins (hydrographic method). The former provides a relative distribution picture of ET. original data set |
| Berner & Berner, 1987           | 72,900 km <sup>3</sup> /yr | water balance methods; estimates of precipitation on land are from L'Vovich, 1973, and runoff from land from Baumgartner and Reichel, 1975 and groundwater discharge from Meybeck, 1986                                                                 |
| Desborough <i>et al.</i> , 2001 | 40.0 mm/month              | GCM simulation (SLAM model); may not be independent with other 4 measures; assuming terrestrial area is 140x10 <sup>12</sup> m <sup>2</sup> ; for 60°S to 90°N                                                                                          |
| Desborough <i>et al.</i> , 2001 | 41.9 mm / month            | GCM simulation (SLAM-IT model); may not be independent with other 4 measures; assuming terrestrial area is 140x10 <sup>12</sup> m <sup>2</sup> ; for 60°S to 90°N                                                                                       |
| Desborough <i>et al.</i> , 2001 | 42.1 mm / month            | GCM simulation; assumed surface resistance of 150 s/m (RS-GI model); may not be independent with other 4 measures; assuming terrestrial area is 140x10 <sup>12</sup> m <sup>2</sup> ; for 60°S to 90°N                                                  |

|                                 |                                          |                                                                                                                                                                                                                                                    |
|---------------------------------|------------------------------------------|----------------------------------------------------------------------------------------------------------------------------------------------------------------------------------------------------------------------------------------------------|
| Desborough <i>et al.</i> , 2001 | 39.0 mm/ month                           | GCM simulation; assumed surface resistance of 150 s/m (RS-I model); may not be independent with other 4 measures; assuming terrestrial area is $140 \times 10^{12}$ m <sup>2</sup> ; for 60°S to 90°N                                              |
| Desborough <i>et al.</i> , 2001 | 38.6 mm/month                            | GCM simulation; assumed surface resistance of 25 s/m (RS model); may not be independent with other 4 measures; assuming terrestrial area is $140 \times 10^{12}$ m <sup>2</sup> ; for 60°S to 90°N                                                 |
| Haddeland <i>et al.</i> , 2011  | 60,000 to 85,000 km <sup>3</sup> /yr     | Multimodel estimate                                                                                                                                                                                                                                |
| Korzoun (ed). UNESCO, 1974/78   | 72,000 km <sup>3</sup> /yr               | original data set; monthly values of ET from land were computed with help of Budyko complex method that is based on the combined solution of the heat and water balance equations and empirical relation between ET rate and soil moisture content |
| L'Vovich, 1973b                 | 71,745 km <sup>3</sup> /yr               | cited in Mather, 1992, Berner & Berner, 1987; Brutsaert, 1982                                                                                                                                                                                      |
| Legates & Mather, 1992          | 553 mm/yr                                | precipitation data from Legates, 1987, accounting method                                                                                                                                                                                           |
| L'Vovich, 1972                  | 72,100 km <sup>3</sup> /yr               | based on L'Vovich, 1954 (river runoff) and on precipitation from Drosdov, 1939                                                                                                                                                                     |
| L'Vovich, 1974/ 1979            | 72,500 km <sup>3</sup> /yr               | cited by Gleick, 1993; Falkenmark & Chapman 1989; Rogers, 1985                                                                                                                                                                                     |
| L'Vovich, 1979                  | 71,475 km <sup>3</sup> /yr               | total land excluding Antarctica, Greenland, and the Canadian archipelago                                                                                                                                                                           |
| Lvovitch, 1970                  | 470 mm/yr and 70,250 km <sup>3</sup> /yr | water balance estimation of water resources for the whole land                                                                                                                                                                                     |
| Mather, 1970                    | 69,000 km <sup>3</sup> /yr               | cited by Baumgartner & Reichel, 1975                                                                                                                                                                                                               |
| Matsuda 1988b                   | 152 mm/yr                                | European Centre for Medium-range Weather Forecasts (ECMWF)                                                                                                                                                                                         |
| Matsuda 1988b                   | 260 mm/yr                                | Geophysical Fluid Dynamics Laboratory (GFDL)                                                                                                                                                                                                       |
| Mu, Zhao & Running, 2011        | 62,800 km <sup>3</sup> /yr               | Improved MODIS global ET estimate.                                                                                                                                                                                                                 |
| Nijssen <i>et al.</i> , 2001a   | 459 mm/yr                                | based on modelling                                                                                                                                                                                                                                 |
| Nijssen <i>et al.</i> , 2001b   | 483 mm/yr                                |                                                                                                                                                                                                                                                    |
| NRC, 1986                       | 71,000 km <sup>3</sup> /yr               | Cited in Shiklomanov, 1997                                                                                                                                                                                                                         |
| Oki <i>et al.</i> , 1995        | 165 mm/yr                                | global water balance                                                                                                                                                                                                                               |
| Oki, 1999                       | 75,000 km <sup>3</sup> /yr               | water vapour data by the European Centre for Medium-range Weather Forecasts (ECMWF), data from Korzoun, 1978, and precipitation data from Zie and Arkin, 1996 for 1989-1992                                                                        |
| Piexoto & Kettani, 1973         | $62 \times 10^{12}$ m <sup>3</sup> /yr   |                                                                                                                                                                                                                                                    |
| Repetto, 1985                   | 72,500 km <sup>3</sup> /yr               |                                                                                                                                                                                                                                                    |



|                                |                                     |                                                                                                                                                                                                             |
|--------------------------------|-------------------------------------|-------------------------------------------------------------------------------------------------------------------------------------------------------------------------------------------------------------|
| Rockstrom <i>et al.</i> , 1999 | 70,000 km <sup>3</sup> /yr          | range: 56,000 to 84,000 km <sup>3</sup> /yr; bottom-up estimate                                                                                                                                             |
| Shiklomanov, 1993              | 72,000 km <sup>3</sup> /yr (485 mm) |                                                                                                                                                                                                             |
| Shiklomanov, 1997              | 72,000 km <sup>3</sup> /yr          | World Water Balance and Water Resources of the Earth, 1974                                                                                                                                                  |
| Shiklomanov, 2000c             | 74,200 km <sup>3</sup> /yr          | new data set from analysis of world hydrological stations; Estimates terrestrial ET based on "observations" from the world's hydrological network, but he does not explain the exact source of the ET data. |
| WRI, 1988                      | 63,000-73,000 km <sup>3</sup> /yr   | compilation of data from several primary and secondary sources                                                                                                                                              |

## References

- Abdul Rahim, N. and Baharuddin, K. Hydrologic regime of dipterocarp forest catchments in Peninsular Malaysia, Hydrology Workshop, University Kebangsaan Malaysia, Kota Kinabalu, Sabah, Malaysia (1986).
- Abtew, W. Evapotranspiration measurements and modelling for three wetland systems in South Florida. *JAWRA* **32(3)**,: 465-473 (1996).
- Abtew, W. and Kahanl, N. Water budget analysis for the Everglades Agricultural Drainage Basin. *JAWRA* **30(3)**, 429-439 (1994).
- Addison, P.A. Studies on evapotranspiration and energy budgets on Truelove Lowland. In: L.C. Bliss (Editor), *Truelove Lowland, Devon Island, Canada: Aa High Arctic Ecosystem*. pp. 281-300 (Univ. Alberta Press, Edmonton, Canada, 1977).
- ADWR, A.D.o.W.R. Hydrographic survey report for the San Pedro River Watershed, The General Adjudication of the Gila River System and source. General Assessment. ADWR, Phoenix, AZ, pp. 604 (1991).
- Afansyev, A.N. and Leksakova, V.D. The water balance of Lake Baikal. *Hydrology of Lakes*, pp. 170-175,: IAHS Publ. No.109 (1973).
- Ahmad, N. An Estimate of Water Loss by Evaporation in Pakistan. Irrigation Drainage and Flood Control Research Council, Lahore, Pakistan, 72 pp (1982).
- Akinremi, O.O., McGinn, S.M. and Barr, A.G. Simulation of soil moisture and other components of the hydrological cycle using a water budget approach. *Can. J. Soil Sci.* **75**, 133-142 (1996).
- Allen, R.G. Using the FAO-56 dual crop coefficient method over an irrigated region as part of an evapotranspiration intercomparison study. *J. Hydrol.* **229(1-2)**, 27-41 (2000).
- Allison, B.C. and Barnes, C.J. Estimation of evaporation from non-vegetated surfaces using natural deuterium. *Nature* **301**, 143-145 (1983).
- Allison, B.C. and Barnes, C.J. Estimation of evaporation from the normally dry Lake Frome in South Australia. *J. Hydrol.* **78**, 229-242 (1985).
- Amin, M.S.M., Mabi, A. and Mansor, S. Use of satellite data to estimate areal evapotranspiration from a tropical watershed, GIS development.net AARS, ACRS (1997).
- Amoriello, T. and Constantini, A. Meteorological stress factors of Italian forest ecosystem. *Arezzo* **30**, 14 (1999).
- Amthor, J.S. et al. Boreal forest CO<sub>2</sub> exchange and evapotranspiration predicted by nine ecosystem process models: intermodel comparisons and relationships to field measurements. *J. Geophys. Res.* **106(D24)**, 33623-33648 (2001).
- Anac, M.S. et al. Optimun irrigation schedules for cotton under deficit irrigation conditions. In: C. Kirda, P. Moutonnet, C. Hera and D.R. Neilsen (Editors), *Crop Yield Response to Defecit Irrigation*. pp. 196-212 (Kluwer Academic Publishers, Dordrecht, 1999).
- Antal, E., Baranyi, S. and Toth, E. Comparison of calculation methods for evaporation using Lake Balaton as an example. *Hydrology of Lakes*, pp. 220-224, IAHS Publ. No.109, (1973).

- Anthoni, P.M., Law, B.E. and Unsworth, M.H. Carbon and water vapour exchange of an open-canopied ponderosa pine ecosystem. *Agric. For. Meteor.* **95**, 151-168 (1999).
- Arkley, R.J. Climates of some great soil groups of the western United States. *Soil Science*, **103(5)**, 389-400 (1967).
- Arnold, J.G. and Allen, P.M. Estimating hydrologic budgets for three Illinois watersheds. *J. Hydrol.* **176(1-4)**, 57-77 (1996).
- Arora, V.K. Streamflow simulations for continental-scale river basins in a global atmospheric general circulation model. *Adv. in Water Resour.* **24(7)**, 775-791(2001).
- Arora, V.K. and Boer, G.J. A GCM-based assessment of global moisture budget and the role of land-surface moisture reservoirs in processing precipitation. *Clim. Dyn.* **20(1)**, 13-29 (2002).
- Aslyng, H.C. Evaporation and radiation heat balance at the soil surface. *Arch. Meteorol. Geophys. Biokl.* **B10**, 359-375 (1960).
- Aslyng, H.C. and Kristensen, K.J. Investigations on the water balance in Danish agriculture. II. 1953-1957. Kgl. Veter. Landbohojskoles, Arsskrift: 64-100 (1958).
- Aslyng, H.C. and Nielsen, B.F. The radiation balance at Copenhagen. *Arch. Meteorol. Geophys. Biokl.* **B10**, 342-358 (1960).
- Aston, A.,. Water-resources and consumption in Hong-Kong. *Urban Ecology*, **2(4)**, 327-351 (1977).
- Ayars, J.E. et al. Water use by drip-irrigated late-season peaches. *Irrig. Sci.* **22**, 187-194 (2003).
- Ayars, J.E. et al. Subsurface drip irrigation of row crops: a review of 15 years of research at the Water Management Research Laboratory. *Agric. Water Manage.* **42(1)**, 1-27 (1999).
- Ayars, J.E. and Soppe, R. Integrated management of irrigation and shallow ground water in the presence of drains. B81211, California Department of Water Resources (2001).
- Baconguis, S.,. Water balance, water use and maximum water storage of a dipterocarp forest watershed in San Lorenzo, Norzagaray, Bulacan. *Sylvatrop.* **2**, 73-98 (1980).
- Bailly, C., Benoit de Cognac, G., Malvos, C., Ningre, J.M. and Sarrailh, J.M. Etude de l'influence du couvert naturel et de ses modifications a Madagascar; expermentations en bassins versants elementaires. *Cahiers Scientifiques du Centre Technique Forestier Tropical* **4**, 1-114 (1974).
- Balek, J., *Hydrology and Water Resources in Tropical Africa.* (Elsevier,1977).
- Balek, J. and Perry, J.E.,. Hydrology of seasonally inundated African headwater swamps. *J. Hydrol.* **19**, 227-249 (1973).
- Ballinger, B.R. and Thornton, J.A. The hydrology of the Lake McIlwaine catchment. In: J.A. Thornton and W.K. Nduku (Editors), *Lake McIlwaine: The Eutrophication and Recovery of a Tropical African Man-Made Lake.* pp. 34-41 (W. Junk, The Hague 1982).
- Barr, A.G., van der Kamp, G., Schmidt, R. and Black, T.A. Monitoring the moisture balance of a boreal aspen forest using a deep groundwater piezometer. *Agric. For. Meteor.* **102(1)**,: 13-24 (2000).

- Bastiaanssen, W.G.M., Ahmad, M.-D. and Chemin, Y. Satellite surveillance of evaporative depletion across the Indus basin. *Water Resour. Res.* **38(12)**, 1273 (2002).
- Bastiaanssen, W.G.M. and Bandara, K.M.P.S. Evaporative depletion assessments for irrigated watersheds in Sri Lanka. *Irrig. Sci.* **21**, 1-15 (2001).
- Batchelor, C.H. The accuracy of evapotranspiration estimated with the FAO modified penman equation. *Irrig. Sci.* **5(4)**, 223-233 (1984).
- Batini, F.E., Black, R.E., Byrne, J. and Clifford, P.J. An examination of the effects of changes in catchment conditions on water yield in the Wungong catchment, Western Australia. *Aust. For. Res.* **10**, 29-38 (1980).
- Baumgartner, A. Water and energy balances of different vegetation covers, World Water Balance, Proceedings of the Reading Symposium. a contribution to the International Hydrological Decade. IASH, UNESCO, WMO (1972).
- Baumgartner, A. and Reichel, E. *The World Water Balance: Mean Annual Global, Continental and Maritime Precipitation, Evaporation and Runoff*. 180 pp (Elsevier, Amsterdam, 1975).
- Baumhardt, R.L. and Lascano, R.J. Water budget and yield of dryland cotton intercropped with terminated winter wheat. *Agron. J.* **91(6)**, 922-927 (1999).
- Bawazir, A.S., Gay, L.W., Sammis, T.W. and King, P. The quotidian cycle of evapotranspiration from saltcedar. In: Proceedings of the 24th Conference on Agricultural and Forest Meteorology. Davis, CA, August 14–18. American Meteorological Society, Boston, MA (2004).
- Beljaars, A.C.M. and Bosveld, F.C. Cabauw data for the validation of land surface parameterization schemes. *J. Climate* **10(6)**, 1172-1193 (1997).
- Bell, F.C.. The acquisition, consumption and elimination of water by sydney urban systems. *Proc. Ecol. Soc. Aust.*, 7: 160-176 (1972).
- Bellot, J. et al. Effect of different vegetation type cover on the soil water balance in semi-arid areas of south eastern Spain. *Phys. Chem. Earth (B)*- **24(4)**, 353-357 (1999).
- Ben Wu, X., Redeker, E.J. and Thurow, T.L. Vegetation and water yield dynamics in an Edwards Plateau watershed. *J. Range Manage.* **54(2)**, 98-105 (2001).
- Berger, D.L. Estimates of evapotranspiration from the Ruby Lake National Wildlife Refuge area, Ruby Valley, northeastern Nevada, May 1999-October 2000. U.S. Dept. of the Interior, U.S. Geological Survey, Carson City, Nevada, 38 pp (2001).
- Bernard, E. Climate in Congo. *Bull. Amer. Meteor. Soc.* **29(9)**, 476-477 (1948).
- Berner, E.K. and Berner, R.A. *The Global Water Cycle: Geochemistry and Environment*. (Prentice-Hall, Englewood Cliffs, New Jersey, 1987).
- Bernhard-Reversat, F., Huttle, C. and Lemee, G. Structure and functioning of evergreen rain forest ecosystems of the Ivory Coast. In: UNESCO (Editor), *Tropical Forest Ecosystems*, pp. 557-574 (Paris, 1978).
- Bethune, M.G. and Wang, Q.J. Simulating the water balance of border-check irrigated pasture on a cracking soil. *Aust. J. Exp. Agr.* **44**, 163-171 (2004).
- Bidlake, W.R., Woodham, W.M. and Lopez, M.A. Evapotranspiration from areas of native vegetation in west-central Florida. U.S. Geological Survey, Denver, CO, 35 pp (1996).
- Billesbach, D.P. and al, e.,. Evapotranspiration in the Nebraska Sand Hills. *Eos. Trans. AGU* **89(47)**, H52D-0899 (2002).

- Black, T.A. et al.,. Annual cycles of water vapour and carbon dioxide fluxes in and above a boreal aspen forest. *Global Change Biology* **2(3)**, 219-229 (1996).
- Blackie, J.R.,. The water balance of the Kimakia catchments. *E. Afr. Agric. For. J.* **45**, 155-174 (1979a).
- Blackie, J.R.,. The water balance of the Kericho catchments. *East African Agric.For. J.* **43**, 55-84 (1979b).
- Blanken, P.D. et al.,. The seasonal water and energy exchange above and within a boreal aspen forest. *J. Hydrol.* **245(1-4)**, 118-136 (2001).
- Bosch, J. and Hewlett, J. A review of catchment experiments to determine the effect of vegetation changes on water yield and evapotranspiration. *J. Hydrol.* **55(1-4)**, 3-23 (1982).
- Bowden, M.J. *Water Balance of a Dry Island*. Geog. Pub. Dartmouth Coll., 6: 89 p (1968).
- Braslavskii, A.P. and Vikulina, Z.A. Evaporation Norms from Water Reservoirs. Ministry of Agriculture of USSR, State Hydrological Institute, Leningrad, 218 pp (1963).
- Brown, H.E. Evaluating watershed management alternatives. Proc. Am. Soc. Civ. Eng., *J. Irrig. Drain. Div.* **97(IR1)**, 93-108 (1971).
- Bruijnzeel, L.A.,. Estimates of evaporation in plantations of *Agathis Dammara* Warb. in South-Central Java, Indonesia. *Journal of Tropical Forest Science* **1(2)**, 145-161 (1988).
- Bruijnzeel, L.A. Hydrology of Tropical Montane Cloud Forests: A Re-evaluation. Second International Colloquium on Hydrology and Water Management in the Humid Tropics, Panama City (1999).
- Bruijnzeel, L.A. and Proctor, J. Hydrology and biogeochemistry of tropical montane cloud forests: what do we really know? In: L.S. Hamilton, J.O. Juvik and F.N. Scatena (Editors), *Tropical Montane Cloud Forests. Ecological Studies*. pp. 38-78 (Springer Verlag, New York, 1995).
- Bruijnzeel, L.A. and Veneklaas, E.J. Climatic conditions and tropical montane forest productivity: the fog has not lifted yet. *Ecology* **79(1)**, 3-9 (1998).
- Bruijnzeel, L.A., Waterloo, M.J., Proctor, J., Kuiters, A.T. and Kotterink, B. Hydrological Observations in Montane Rain-Forests on Gunung Silam, Sabah, Malaysia, with Special Reference to the Massenerhebung Effect. *Journal of Ecology* **81(1)**, 145-167 (1993).
- Brye, K.R., Norman, J.M., Bundy, L.G. and Gower, S.T. Water-budget evaluation of prairie and maize ecosystems. *Soil Sci. Soc. Am. J.* **64**, 715-724 (2000).
- Bubb, K.A. and Croton, J.T. Effects on catchment water balance from the management of *Pinus* plantations on the coastal lowlands of south-east Queensland, Australia. *Hydrol. Process.* **16(1)**, 105-117 (2002).
- Buttle, J.M. and Metcalfe, R.A. Boreal forest disturbance and streamflow response, northeastern Ontario. *Can. J. Fish Aquat. Sci.* **57**(Supple. 2): 5-18 (2000).
- Calder, I.R. The measurement of water losses from a forested area using a "natural" lysimeter. *J. Hydrol.* **30**, 311-325 (1976).
- Calder, I.R. Forest Evaporation, Canadian Hydrology Symposium: Hydrological Processes of Forested Areas. National Research Council, Canada, pp. 173-193 (1982).

- Calder, I.R. Water use of eucalypt - a review. In: I.R. Calder, R.L. Hall and P.G. Adlard (Editors), *Growth and Water Use of Forest Plantations*. pp. 167-179 (John Wiley and Sons, Chichester, England, 1992).
- Calder, I.R. Forests and Water - Closing the gap between public and science perceptions, Water Week 2003. SIWI, Stockholm (2003).
- Calder, I.R., Wright, I.R. and Murtiyarso, D. A study of evaporation from tropical rainforest - West Java. *J. Hydrol.* **89(1-2)**, 13-31 (1986).
- Caldwell, M.M., White, R.S., Moore, R.T. and Camp, L.B. Carbon balance, productivity, and water use of cold-winter desert shrub communities dominated by C3 and C4 species. *Oecologia* **29**, 275-300 (1977).
- Calvo, J. An evaluation of Thornthwaite's water balance technique in predicting stream runoff in Costa Rica. *Hydrological Sciences Journal* **31**, 51-60 (1986).
- Campbell, D.I. and Murray, D.L. Water-Balance of Snow Tussock Grassland in New-Zealand. *J. Hydrol.* **118(1-4)**, 229-245 (1990).
- Campbell, T. 1982 in Stephenson, 1994. *Ciencias Urbanas*, 1: 28.
- Carlson, D.H., Thurow, T.L., Knight, R.W. and Heitschmidt, R.K. Effect of Honey Mesquite on the Water-Balance of Texas Rolling Plains Rangeland. *J. Range Manage.* **43(6)**, 491-496 (1990).
- Chen, T.H. et al. Cabauw experimental results from the project for intercomparison of land-surface parameterization schemes. *J. Climate* **10(6)**, 1194-1215 (1997).
- Cheng, J.D., Lin, L.L. and Lu, H.S. Influences of forests on water flows from headwater watersheds in Taiwan. *Forest Ecology and Management* **165(1-3)**, 11-28 (2002).
- Cherkasov, A.E., Batsukh, N. and Shumeyev, V.P. The water balance and the level regime of Lake Khubsugul (Kosogol). *Hydrology of Lakes*, pp.164-166, IARS Publ. **No. 109** (1973).
- Choudhury, B.J. and DiGirolamo, N.E. A biophysical process-based estimate of global land surface evaporation using satellite and ancillary data - I. Model description and comparison with observations. *J. Hydrol.* **205(3-4)**, 164-185 (1998).
- Christen, A. and Vogt, R. Energy and radiation balance of a central European city. *Int. J. Climatol.* **24**, 1395-1421 (2004).
- Clarke, R.T. and McCulloch, J.S.G. The effect of land use on the hydrology of small upland catchments. In: G.E. Hollis (Editor), *Man's Impact on the Hydrological Cycle in the United Kingdom*. Geo Abstracts Ltd., Norwich, England, pp. 71-78 (1979).
- Clarke, R.T. and Newson, M.D. Some detailed water balance studies of research catchments. *Proc. R.I Soc. Lond.* **A363**, 21-42 (1978).
- Cleverly, J.R., Dahm, C.N., Thibault, J.R., Gilroy, D.J. and Coonrod, J.E.A. Seasonal estimates of actual evapo-transpiration from *Tamarix ramosissima* stands using three-dimensional eddy covariance. *Journal of Arid Environments* **52(2)**, 181-197 (2002).
- Clifton, C.A. and Taylor, J. Improving pasture management for control of dryland salinity, Research note no. 8. Department of Conservation and Natural Resources, Bendigo, Victoria, Australia (1994).
- Cochran, G.F., T.M. Mihevc, S.W. Tyler, and T.J. Lopes.. Study of salt crust formation mechanisms on Owens (Dry) Lake California. Desert Research Institute, Reno, Nevada (1988).

- Cohen, S., Ianetz, A. and Stanhill, G. Evaporative climate changes at Bet Dagan, Israel, 1964-1998. *Agric. For. Meteor.* **111(2)**, 83-91 (2002).
- Collinet, J., Monteny, B. and Pouyaud, B. Le milieu physique. In: UNESCO (Editor), *Recherche et Amenagement en Milieu Forestier Tropical Humide: le Projet Tai de Cote d'Ivoire*, Notes Techn. MAB 15, Paris, pp. 35-58 (1984).
- Conley, M.M. et al. CO<sub>2</sub> enrichment increases water-use efficiency in sorghum. *New Phytologist* **151**, 407-412 (2001).
- Cook, P.G. et al. Water balance of a tropical woodland ecosystem, Northern Australia: a combination of micro-meteorological, soil physical and groundwater chemical approaches. *J. Hydrol.* **210(1-4)**, 161-177 (1998).
- Cornish, P.M. The effects of logging and forest regeneration on water yield in a moist eucalypt forest in New South Wales, Australia. *J. Hydrol.* **150**(301-322) (1993).
- Cornish, P.M. and Vertessy, R.A. Forest age-induced changes in evapotranspiration and water yield in a eucalypt forest. *J. Hydrol.* **242**: 43-63 (2001).
- Costa, M.H. and Foley, J. Water balance of the Amazon Basin: Dependence on vegetation cover and canopy conductance. *J. Geophys. Res.* **102(D20)**: 23973-23989 (1997).
- Costa, M.H. and Foley, J. Trends in the hydrologic cycle of the Amazon basin. *J. Geophys. Res.* **104(D12)**, 14189-14198 (1999).
- Cox, J.W. and Pitman, A.J. The water balance of pastures in a South Australian catchment with sloping texture-contrast soils. In: T.R. McVicar, L. Rui, J. Walker, R.W. Fitzpatrick and L. Changming (Editors), *Regional Water and Soil Assessment for Managing Sustainable Agriculture in China and Australia*. pp. 82-94 (ADIAR Monograph, 2002).
- Culler, R.C. and Geological Survey (U.S.). Evapotranspiration before and after clearing phreatophytes, Gila River Flood Plain, Graham County, Arizona. Geological Survey professional paper ; 655-P. U.S. Geological Service, Washington, Alexandria, VA., viii, 67pp (1982).
- Davis, K.R. Trickle irrigation of cotton in California, Western Cotton Production Conference, Las Cruces, NM, pp. 34-38 (1983).
- De Los Santos, A.E. Water budget and nutrient fluxes in Mossy Forest on Mt. Data, Mt. Province. MSc. Thesis, University of the Philippines at Los Banos, Laguna, Philippines, 93 pp (1981).
- Delfs, J. Interception and streamflow in stands of Norway spruce and beech in West Germany. In: W.E. Sopper and H.W. Lull (Editors), *Forest Hydrology*. pp. 179-185 (Pergamon, New York, 1967).
- Dennehy, K.F. and McMahon, P.B. Microclimate and Actual Evapotranspiration in a Humid Coastal-Plain Environment. *J. Hydrol.* **93(3-4)**, 295-312 (1987).
- Desborough, C.E., Pitman, A.J. and McAvaney, B. Surface energy balance complexity in GCM land surface models. Part II: coupled simulations. *Clim. Dyn.* **17(8)**, 615-626 (2001).
- DID. Sungai Tekam Experimental Basin; Transition Report July 1980 to June 1983. Water Resources Publication no. 16, Drainage and Irrigation Department, Ministry of Agriculture, Kuala Lumpur, Malaysia (1986).
- Dietrich, W.E., Windsor, D.M. and Dunne, T. Geology, climate and hydrology of Barro Colorado Island. In: E. Leigh, A.S. Rand and D.M. Winsor (Editors), *The Ecology*

- of a Tropical Forest: Seasonal Rhythms and Long-term Changes*. pp. 21-46 (Smithsonian Institution, Washington, D.C., 1982).
- Dirnbock, T. and Grabherr, G.. GIS assessment of vegetation and hydrological change in a high mountain catchment of the Northern Limestone Alps. *Mountain Research and Development* **20(2)**, 172-179 (2000).
- Dolan, T.J., Hermann, A.J., Bayley, S.E. and Jr., J.Z. Evaporation of a Florida USA Freshwater Wetland. *J. Hydrol.* **74**, 355-371 (1984).
- Dow, C.L. and DeWalle, D.R., Long-term trends in evaporation on urbanizing and forested watersheds in Pennsylvania. In Proceedings of the Conference on Water Management in Urban Areas, Houston, T X. (Bethesda, Maryland: American Water Resources Association), pp. 305-312, (1995).
- Dow, C.L. and DeWalle, D.R. Trends in evaporation and Bowen ratio on urbanizing watersheds in eastern United States. *Wat. Resour. Res.* **36(7)**, 1835-1843 (2000).
- Dunin, F.X. The effect of vegetation changes on parameters for estimating runoff near Bacchus Marsh. *Civ. Eng. Trans., Inst. Engrs.*, Australia, CE, **7(1)**, 16-22 (1965).
- Dunin, F.X. and Aston, A.R., The Development and Proving of Models of Large-Scale Evapotranspiration - an Australian Study. *Agric. Water Manage.* **8(1-3)**, 305-323 (1984).
- Dunin, F.X. and Reyenga, W. Evaporation from a Themeda Grassland .1. Controls Imposed on Process in a Sub-Humid Environment. *J. Applied Ecol.* **15(1)**, 317-325 (1978).
- Dunn, S.M. and Mackay, R. Spatial Variation in Evapotranspiration and the Influence of Land-Use on Catchment Hydrology. *J. Hydrol.* **171(1-2)**, 49-73 (1995).
- Dye, P.J. Climate, forest and streamflow relationships in South African afforested catchments. *Commonwealth Forestry Review* **75**, 31-38 (1996).
- Eaton, A.K. and Rouse, W.R. Controls on evapotranspiration at a subarctic sedge fen. *Hydrol. Process.* **15**, 3423-3431 (2001).
- Edwards, K.A. The water balance of the Mbeyz experimental catchments. *E. Afri. Agric. For. J.* **43**, 231-247 (1979).
- El-Nokrashy, M.A. Effect of frequency of irrigation on quality and quantity of bearing-orange varieties budded on three root stocks in loamy clay soil. M.S. Thesis, Cairo University, Cairo, Egypt (1963).
- Elsenbeer, H., Cassell, D.K. and Zuniga, L. Throughfall in the Terra Firme forest of western Amazonia. *Journal of Hydrology ( N.Z.)* **32**, 30-44 (1994).
- Eltahir, E.A.B. and Bras, R.L. Sensitivity of Regional Climate to Deforestation in the Amazon Basin. *Adv. Water Resour.* **17(1-2)**, 101-115 (1994).
- Everson, C.S. The water balance of a first order catchment in the montane grasslands of South Africa. *J. Hydrol.* **241**, 110-123 (2001).
- Ewel, K.C. and Gholz, H.L. A Simulation-Model of the Role of Belowground Dynamics in a Florida Pine Plantation. *For. Sci.* **37(2)**, 397-438 (1991).
- Ewel, K.C. and Smith, J.E. Evapotranspiration from Florida Pondcypress swamps. *Wat. Resour. Bulletin*, **28(2)**, 299-304 (1992).
- Farnsworth, R.K., Thompson, E.S. and Peck, E.L. Evaporation atlas for the contiguous 48 United States. NWS-33, NOAA Technical report (1982).



- Federov, S.F. Issledovanie elementov vodnogo balansa v lesnoi zone Evropeiskoi territorii USSR (Study of the water-balance components in the forest zone of the European USSR). 264 pp (Gidrometeoizdat, Leningrad, 1977).
- Feller, M.C. Water balances in *Eucalyptus regans*, *E. obliqua* and *Pinus radiata* forests in Victoria. *Aust. For.* **44**, 154-161 (1981).
- Fieldler, S. and Sommer, M. Water and Redox Conditions in Wetland Soils - Their Influence on Pedogenic Oxides and Morphology. *Soil Science Society of America Journal* **335**, 326-335 (2004).
- Finnish\_Environment\_Institute,. Wetland Forest. <http://www.rdg.ac.uk/INCA/pages/finlandwp.htm> (2004).
- Flerchinger, G.N. and Cooley, K.R. A ten-year water balance of a mountainous semi-arid watershed. *J. Hydrol.* **237**, 86-99 (2000).
- Flerchinger, G.N., Hanson, C.L. and Wight, J.R. Modeling evapotranspiration and surface energy budgets across a watershed. *Water Resour. Res* **32(8)**, 2539-2548 (1996).
- Flohn, H. The influence of man on the hydrological cycle - intervention to H.C. Pereira, World Water Balance, Proceedings of the Reading Symposium. A contribution to the International Hydrological Decade. IASH, UNESCO, WMO, Belgium, pp. 689 (1972).
- Focan, A. and Fripiat, J.J. Une annee d'observation de l'humidite du sol a Yangambi. *Bulletin des Seances de L'Institut Royal Colonial Belge*, **24**, 971-984 (1953).
- Foster, P. The potential negative impacts of global climate change on tropical montane cloud forests. *Earth-Science Reviews* **55(1-2)**, 73-106 (2001).
- Franco-Vizcaino, E., Escoto-Rodriguez, M., Sosa-Ramirez, J. and Minnich, R.A. Water balance at the southern limit of the Californian mixed-conifer forest and implications for extreme-deficit watersheds. *Arid Land Research and Management* **16(2)**, 133-147 (2002).
- Frangi, J.L. and Lugo, A.E. Ecosystem Dynamics of a Sub-Tropical Floodplain Forest. *Ecological Monographs* **55(3)**, 351-369 (1985).
- Frank, D.A. and Inouye, R.S. Temporal Variation in Actual Evapotranspiration of Terrestrial Ecosystems - Patterns and Ecological Implications. *J. Biogeogr.* **21(4)**, 401-411 (1994).
- Franken, W. and Leopoldo, P.R. Hydrology of catchment areas in central Amazonian forest streams. In: H. Soili and W. Junk (Editors), *The Amazon: Limnology and Landscape Ecology of a Mighty Tropical River and its Basin*. pp. 501-519 (Dordrecht, the Netherlands, 1984).
- Friend, A.D. and Cox, P.M. Modeling the Effects of Atmospheric CO<sub>2</sub> on Vegetation Atmosphere Interactions. *Agric. For. Meteor.* **73(3-4)**, 285-295 (1995).
- Friend, A.D., Stevens, A.K., Knox, R.G. and Cannell, M.G.R. A process-based, terrestrial biosphere model of ecosystem dynamics (Hybrid v3.0). *Ecological Modelling* **95(2-3)**, 249-287 (1997).
- Galoux, A. et al. Radiation, heat, water and carbon dioxide balances. In: D.E. Reichle (Editor), *Dynamic Properties of Forest Ecosystems*. pp. 87-204 (Cambridge University Press, New York, 1981).

- Garcia-Martino, A.R., Warner, G.S., Scatena, F.N. and Civco, D.L. Rainfall, runoff and elevation relationships in the Luquillo Mountains of Puerto Rico. *Caribbean Journal of Science* **32**, 413-424 (1996).
- Gash, J.H.C. and Stewart, J.B.,. The evaporation from Thetford Forest during 1975. *J. Hydrol.* **35**, 385-396 (1977).
- Gatewood, J.S., Robinson, T.W., B.R. Colby, Hem, J.D. and Halpenny, L.C. Use of water by bottom-land vegetation in Lower Safford Valley, Arizona. US Geological Survey Water Supply Paper, 1103: 210 pp (1950).
- German, E.R. Regional evaluation of evapotranspiration in the Everglades. U.S. Dept. of the Interior, U.S. Geological Survey, Tallahassee, Florida, 48 pp (2000).
- German, E.R., unpub. Regional evaluation of evapotranspiration in the everglades. USGS.
- German, E.R. and Sumner, D.M. Evapotranspiration rates from two different sawgrass communities in South Florida during drought conditions. US Geological Survey, Altamonte Springs, Florida, 12 pp (2001).
- Gervois, S. et al. Including croplands in a global biosphere model: methodology and evaluation at specific sites. *Earth Interactions* **8(16)**, (2004).
- Gholz, H.L. and Clark, K.L. Energy exchange across a chronosequence of slash pine forests in Florida. *Agric. For. Meteor.* **112(2)**, 87-102 (2002).
- Giambelluca, T.W. Land-Use Effects on the Water-Balance of a Tropical Island. *National Geographic Research* **2(2)**, 125-151(1986).
- Gilmour, D.A. Catchment water balance studies on the wet tropical coast of North Queensland. James Cook University, Townsville, Queensland, Australia (1975).
- Gilmour, D.A. Logging and the environment, with particular reference to soil and stream protection in tropical rainforest situations. FAO Conservation Guide no. 1. FAO, Rome, 223-235 pp (1977).
- Goetz, C.L. and Shelton, S.G. Infiltration and evapotranspiration within the Albuquerque, New Mexico, area with a section on Historical water resource trends during the 1954-80's period of growth, 96 pp (1990).
- Gohre, K. Der Wasserhaushalt im boden. *Zeitschrift fur Meteorologie* **3**, 13-19 (1949).
- Gonggrijp, L. Evaporation from montane forest in West Java at an altitude of 1750-2000 m a.s.l. *Tectona* **34**, 437-447 (1941b).
- Granier, A. ET data for Hesse, Sarrebourg, Unité Ecophysiologie, Nancy, France (2004).
- Gray, L.J., Dodds, W.K., MacPherson, G.L. and Koelliker, J.K. Hydrology and Aquatic Chemistry of Kings Creek, Konza Prairie. In: A.K. Knapp, J.M. Briggs, D.C. Hartnett and S.L. Collins (Editors), *Grassland Dynamics: Long-Term Ecological Research in Tallgrass Prairie*. pp. 159 (Oxford University Press, 1998).
- Greenwood, E.A.N., Klein, L., Beresford, J.D. and Watson, G.D. Differences in annual evaporation between grazed pasture and Eucalyptus species in plantations on a saline farm catchment. *J. Hydrol.* **78**, 261-278 (1985).
- Griffiths, J.F.E. *Climates of Africa*. World Survey of Climatology. 604 pp (Elsevier, Amsterdam, 1972).
- Grimes, D.W. Water requirements and use patterns of the cotton plant, Western Cotton Production Conference, pp. 27-30 (1982).
- Grimmond, C.S.B. and Oke, T.R. Urban Water-Balance .2. Results from a Suburb of Vancouver, British-Columbia. *Water Resour. Res.* **22(10)**, 1404-1412 (1986).

- Grünwald, T. ET data for Anchor Station Tharandt. <http://www.forst.tu-dresden.de/ihm/homepage.html>, Technische Universität Dresden, Institut für Hydrologie und Meteorologie (2004).
- Gutowski, W.J. et al. A coupled land-atmosphere simulation programme (CLASP). *J. Geophys. Res.* **107(D16)**,4283,10.1029/2001JD000392 (2002).
- Hafkenscheid, R.L.L.J. Hydrology and biogeochemistry of montane rain forests of contrasting stature in the Blue Mountains of Jamaica. PhD Thesis, Vrije Universiteit, Amsterdam (2000).
- Haise, H.R. and viets, F.G. Water requirements as influenced by fertiliser use. 3rd ICID Congress, San Francisco, pp. 8.497-8.508 (1957).
- Hall, R.L. and Harding, R.J. The Water-Use of the Balquhidder Catchments - a Processes Approach. *J. Hydrol.* **145(3-4)**, 285-314 (1993).
- Hargreaves, G.H. and Samani, Z.A. World Water for Agriculture. International Irrigation Centre, Department of Agricultural and Irrigation Engineering, Utah State University, Logan, Utah (1986).
- Harr, R.D. and Price, K.R. Evapotranspiration from a Greasewood-Cheatgrass Community. *Water Resour. Res.* **8(5)**, 1199-1203 (1972).
- Hauser, V.L. and Gimon, D.M. Evaluating Evapotranspiration (ET) Landfill cover performance using hydrologic models, USA Air Force Center for Environmental Excellence, Brooks City-Base, TX (2004).
- Healy, R.W., DeVries, M.P. and A.M. Sturrock, J. Evapotranspiration and microclimate at a low-level radioactive-waste disposal site in northwestern Illinois, U.S. Geological Survey, Denver, CO (1989).
- Helvey, J.D. Watershed behaviour after forest fire in Washington, Irrig. Drain. Div. Spec., Fort Collins, Colorado (1973).
- Helvey, J.D. Effect of a north-central Washington wild-fire on runoff and sediment production. *JAWRA* **16(4)**, 625-634 (1980).
- Henning, D. *Atlas of the Surface Heat Balance of the Continents: Components and Parameters Estimated from Climatological Data*. Gebruder Borntraeger, Berlin (1989).
- Herrmann, R. Vertically differentiated water balance in tropical high mountains - with special reference to the Sierra Nevada de Sa. Marta, Colombia. IAHS Publication no. 93, pp. 262-273 (1970).
- Hewlett, J. and Hibbert, A.R. Increases in water yield after several types of forest cutting. *IAHS Publ. No. 6*, pp. 5-17 (1961).
- Hibbert, A.R. Increases in streamflow after converting chaparral to grass. *Water Resour. Res.* **7**, 71-80 (1971).
- Hibbert, A.R. Managing vegetation to increase flow in the Colorado River basin. RM-66, U.S. Dep. Agric. For. Serv (1979).
- Hicks, D.L., Campbell, D.J. and Atkinson, I.A.E. Options for managing the Kaimaumau wetland, Northland, New Zealand, Department of Conservation, Wellington, New Zealand (2001).
- Hinzman, L.D. The interdependence of the thermal and hydrologic processes of an arctic watershed and their response to climatic change. PhD Thesis, University of Alaska, Fairbanks, AK (1990).

- Hirota, T. Estimation of seasonal and annual evaporation using agrometeorological data from the Thai meteorological department by the heat budget models. *Journal of the Meteorological Society of Japan*, **79(1B)**, 365-371 (2001).
- Hodnett, M.G., Dasilva, L.P., Darocha, H.R. and Senna, R.C. Seasonal Soil-Water Storage Changes beneath Central Amazonian Rain-Forest and Pasture. *J. Hydrol.* **170(1-4)**, 233-254 (1995).
- Hoffman, G.J. Evapotranspiration in saline soils, National Conference on Advances in Evapotranspiration. American Society of Agricultural Engineers, Chicago Il, pp. 35-42 (1985).
- Hoffmann, W.A. and Jackson, R.B. Vegetation-climate feedbacks in the conversion of tropical savanna to grassland. *Journal of Climate*, **13(9)**, 1593-1602 (2000).
- Holscher, D., Sa, T.D.A., Bastos, T.X. and Denich, M. Evaporation from young secondary vegetation in eastern Amazonia. *J. Hydrol.* **193(1-4)**, 293-305 (1997).
- Holwerda, F. A study of evaporation from lowland and montane tropical rain forest in the Luquillo Mountains, Puerto Rico. MSc Thesis, Vrije Universiteit, Amsterdam (1997).
- Hoover, M.D. Effect of removal of forest vegetation upon water-yield. *Trans. Am. Geophys. Union.* **25**, 969-977 (1944).
- Hoyt, W.G. and Troxell, H.C. Forest and streamflow. *Trans. Amer. Soc. Civil Eng.* **99**, 1-111 (1934).
- Hsia, Y.J. and Lin, Y.L. Optimum water year selection for small forest watersheds. 353, Taiwan Forestry Research Institute, Taipei, Taiwan (1981).
- Hudson, J.A. The contribution of soil moisture storage to the water balances of upland forested and grassland catchment. *Hydrological Sciences Journal* **33**, 289-308 (1988).
- Hudson, J.A. and Gilman, K. Long-Term Variability in the Water Balances of the Plynlimon Catchments. *J. Hydrol.* **143(3-4)**, 355-380 (1993).
- Hughes, C.E., Kalma, J.D., Binning, P., Willgoose, G.R. and Vertzonis, M. Estimating evapotranspiration for a temperate salt marsh, Newcastle, Australia. *Hydrol. Process.* **15(6)**, 957-975 (2001).
- Humphreys, E.R. et al. Annual and seasonal variability of sensible and latent heat fluxes above a coastal Douglas-fir forest, British Columbia, Canada. *Agric. For. Meteor.* **115**, 109-125 (2003).
- Hunsaker, D.J., Clemmens, A.J. and Fangmeier, D.D. Cotton response to high frequency surface irrigation. *Agricultural Water Management*, **37(1)** 55-74 (1998).
- Hurst, H.E. The Nile, a general account of the river and the utilisation of its waters. Constable, London, 326 pp (1952).
- Hurst, H.E. and Philips, P. The Nile Basin: the major Nile projects. Paper No. 26, Nile Control Department, Cairo (1931).
- Hutjes, R.W.A., Wierda, A. and Veen, A.W.L. Rainfall Interception in the Tai Forest, Ivory-Coast - Application of 2 Simulation-Models to a Humid Tropical System. *J. Hydrol.* **114(3-4)**, 259-275 (1990).
- Hutley, L.B., Doley, D., Yates, D.J. and Boonsaner, A. Water balance of an Australian subtropical rainforest at altitude: The ecological and physiological significance of intercepted cloud and fog. *Australian Journal of Botany* **45(2)**, 311-329 (1997).

- Hutley, L.B., O'Grady, A.P. and Eamus, D. Evapotranspiration from eucalypt open-forest savanna of northern Australia. *Functional Ecology* **14(2)**, 183-194 (2000).
- Hutmacher et al. Subsurface drip and furrow irrigation comparison with alfalfa in the imperial valley, 31st California Alfalfa & Forage Symposium. Alfalfa Workgroup, University of California, Modesto, California, pp. 75-86 (2002).
- Huttel, C. Recherches sur l'ecosysteme de la foret subequatoriale de basse Cote d'Ivoire. IV Estimation du bilan hydrique. *La Terre et la Vie* **29**, 192-202 (1975).
- Jackson, R.B., Sala, O.E., Paruelo, J.M. and Mooney, H.A. Ecosystem water fluxes for two grasslands in elevated CO<sub>2</sub>: a modelling analysis. *Oecologia* **113**, 537-546 (1998).
- Jaeger, L. and Kessler, A. Twenty years of heat and water balance climatology at the Harthim pine forest, Germany. *Agric. For. Meteor.* **84(1-2)**, 25-36 (1997).
- Jetten, V. Modelling the effects of logging on the water balance of a tropical rain forest. University of Utrecht, the Netherlands (1994).
- Jia, Y., Ni, G., Yishitani, J., Kawahara, Y. and Kinouchi, T. Coupling simulation of water and energy budgets and analysis of urban development impact. *Journal of Hydraulic Engineering*, **July / Aug 2002**, 302-311 (2002).
- Jin, M.G., Zhang, R.Q., Sun, L.F. and Gao, U.F. Temporal and spatial soil water management: a case study in the Heilonggang region, PR China. *Agricultural Water Management* **42(2)**, 173-187 (1999).
- Jipp, P.H., Nepstad, D.C., Cassel, D.K. and Reis de Carvalho, C. Deep soil moisture storage and transpiration in forests and pastures of seasonally-dry Amazonia. *Climatic Change* **39**, 395-412 (1998).
- Joffre, R. and Rambal, S. How Tree Cover Influences the Water-Balance of Mediterranean Rangelands. *Ecology* **74(2)**, 570-582 (1993).
- Johnson, E.A. and Kovner, J.L. Effect on streamflow of cutting a forest understory. *For. Sci.* **2**, 82-91 (1956).
- Johnston, R.S. Evapotranspiration from bare, herbaceous and Aspen plots. *Water Resour. Res.* **6(1)**, 324-327 (1970).
- Johnston, S., Tew, R.K. and Doty, R.D. Soil moisture depletion and estimated evapotranspiration on Utah Mountain Watersheds. INT-97, USDA Forest Service (1969).
- Jolly, I.D., Dowling, T.I., Zhang, L., Williamson, D.R. and Walker, G.R. Water and salt balances of the catchments of the Murray-Darling Basin. 37/97, CSIRO (1997).
- Jordan, C.F. An Amazonian Rain Forest. Parthenon Publishing, New Jersey (1989).
- Jordan, C.F. and Heuvelop, J.. The water budget of an Amazonian rain forest. *Acta Amazonia* **11(1)**, 87-92 (1981).
- Jordan, D.G. and Fisher, D.W. Relation of bulk precipitation and evapotranspiration to water quality and water resources, St. Thomas Virgin Islands (1977).
- Kane, D.L., Gieck, R.E. and Hinzman, L.D. Evapotranspiration from a small Alaskan arctic watershed. *Nordic Hydrology* **21**, 253-272 (1990).
- Keig, G., Fleming, P.M. and McAlpine, J.R. Evaporation in Papua New Guinea. *The Journal of Tropical Geography* **48**, 19-30 (1979).
- Kenworthy, J.B. Water balance in the tropical rain forest: a preliminary study in the Ulu Gombak forest reserve, *Malaysia. Nat. J.* **22**, 129-135 (1969).

- Kergoat, L. et al. Impact of doubled CO<sub>2</sub> on global-scale leaf area index and evapotranspiration: conflicting stomatal conductance and LAI responses. *J. Geophys. Res.* **107(D24)**, 4808 (2002).
- Klinge, R., Schmidt, J. and Folster, H. Simulation of water drainage of a rain forest and forest conversion plots using a soil water model. *J. Hydrol.* **246(1-4)**, 82-95 (2001).
- Klohn-Crippen. Watershed Flows and Stormwater Runoff: estimates for 1996 and 2036, Regional District Greater Vancouver, Vancouver, British Columbia (1999).
- Knowles, L. Estimation of evapotranspiration in the Rainbow Springs and Silver Springs basins in North-Central Florida, Southwest Florida Water Management District, Tallahassee, Florida (1996).
- Knox, C.E. and Nordenson, T.J. Average annual runoff and precipitation in the New England - New York area, US Geol Survey. Dept Interiors Hydrological Investigations ( Undated).
- Kohler, M.A., Nordenson, T.J. and Baker, D.R. Evaporation maps for the United States. 37, US Weather Bureau (1959).
- Koranda, J.J., Clegg, B. and Stuart, M. Radio-tracer measurement of transpiration in tundra vegetation, Barrow, Alaska. In: L.L. Tieszen (Editor), *Vegetation and Production Ecology of an Alaska Arctic Tundra*. pp. 359-370 (Springer-Verlag, Heidelberg, 1978).
- Korzoun, V.I. World Water Balance and Water Resources of the Earth. Studies and Reports in Hydrology, 25. UNESCO, Paris (1974/78).
- Kostin, S.I. Radiation, heat and water balances of the soil-plant provinces of the central chernozem belt. In: T.G. Berlyand (Editor), *Heat Balance (Teplovoi Balans)*. pp. 100-118 (Gidrometeorologicheskoe Press, Leningrad, 1970).
- Kostner, B. Evaporation and transpiration from forests in Central Europe - relevance of patch-level studies for spatial scaling. *Meteorol. Atmosph. Phys.* **76**, 69-82 (2001).
- Kotoda, K. and Mizuyama, T. Water balance. In: S. Horie (Editor), *Lake Biwa*. pp. 165-174 (W. Junk, Dordrecht, 1984).
- Kotwicki, V. and Clark, R.D.S. Aspects of the water balance of three Australian terminal lakes, Vienna Symposium. IAHS Publ. No.206, pp. 3-12 (1991).
- Krestovsky, O.I., 1969b. in Shiklomanov & Krestovsky 1988.
- Krestovsky, O.I. Sostoianie vodnogo balansa i tendentsii izmenenia stoke v svazi s promyshlennym ispolzovaniem lesov Volg-Kamskogo mezhdurechia (The state of water balance and trends in runoff changes due to industrial forest utilization in the Volga-Kama interfluvial area). The Influence of Man's Activity on Game Animal Populations and their Habitat. pp. 1317 (VNIOZ Press, Kirov, 1980).
- Krishnamurthy, K.V. and Ibrahim, A.H. Hydrometeorological studies of Lakes Victoria, Kyoga and Albert. In: W.C. Ackermann and e. al. (Editors), *Geophysical monograph: Man-Made Lakes*, pp. 272-277 (Washington D.C., 1973).
- Kristensen, K.J. Temperature and heat balance of soil. *Oikos* **10**, 103-120 (1959).
- Kullus, L.-P. Water balance of Lake Peipsi-Pikhva. Hydrology of Lakes, pp. 158-163, IAHS publication no. **109**: (1973).
- Kumagai, T. et al. Water cycling in a Bornean tropical rain forest under current and projected precipitation scenarios. *Water Resour. Res.* **40(W01104)**: doi:10.1029/2003/WR002226, (2004b).

- Kuraji, K. Hydrological Characteristics of Moist Tropical Forests. *Bulletin of Tokyo University Forests* **95**, 93-208 (1996).
- Kutywayo, D. Head of Coffee Research Station. In: S. Sterling (Editor), Chipinge, Zimbabwe (2004).
- L'Vovich, M.I. World water balance (general report), Reading Symposium, *IASH-UNESCO-WMO Publ. no. 93*, pp. 401-415 (1970).
- L'Vovich, M.I. World Water Balance: General Report. In: U. IAHS, WMO (Editor), *World Water Balance: Reading Symposium. Contribution to the International Hydrological Decade*. pp. 401-415 (Reading, UK, 1972).
- L'Vovich, M.I. The water balance of the world's continents and a balance estimate of the world's fresh water resources. *Soviet Geography* **14(3)**, 135-142 (1973b).
- L'Vovich, M.I., 1974/1979. World Water Resources and Their Future. Prosvescheniye, Moscow, 263 pp (1974/1979).
- L'Vovich, M.I. and Chernogayeva. *Soviet Geography* **18**, 302 (1977).
- L'vovich, M.I. World Water Resources and their Future. Translation by the American Geophysical Union, LithoCrafters, Inc., Chelsea, Michigan (1979).
- Laczniaik, R.J., DeMeo, G.A., Reiner, S.R., Smith, J.L. and Nylun, W.E. Estimates of Ground-Water Discharge as Determined from Measurements of Evapotranspiration, Ash Meadows Area, Nye County, Nevada. USGS (1999a).
- Laczniaik, R.J., DeMeo, G.A., S.R. Reiner, Smith, J.L. and Nylund, W.E. Estimates of Ground-Water Discharge as Determined from Measurements of Evapotranspiration, Ash Meadows Area, Nye County, Nevada (1999b).
- Lamourne et al., 1994. cited in Stephenson, 1994.
- Lane, L.J., Romney, E.M. and Hakonson, T.E. Water-Balance Calculations and Net Production of Perennial Vegetation in the Northern Mojave Desert. *Journal of Range Management* **37(1)**, 12-18 (1984).
- Lane, P.N.J. et al. Water balance of tropical eucalypt plantations in south-eastern China. *Agric. For. Meteor.* **124**, 253-267 (2004).
- Langford, K.J. Change in yield of water following a bushfire in a forest of Eucalyptus regnans. *J. Hydrol.* **29**, 87-114 (1976).
- Langford, K.J., Moran, R.J. and O'Shaughnessy, P.J. The Coranderk experiment - the effects of roading and timber harvesting in a mature mountain ash forest on streamflow yield and quality, First National Symposium on Forest Hydrology, Melbourne, Australia, pp. 92-102 (1982).
- Lapworth, C.F. Evaporation from a reservoir near London. *J. Inst. Water Environ. Manag.* **19**, 163-181 (1965).
- Larsen, M.C. and Conception, I.M. Water budgets of forested and agriculturally developed watersheds in Puerto Rico, Third International Symposium on Water Resources: Fifth Caribbean Islands Water Resources Congress. American Water Resources Association, Middleburg, Va., pp. 199-204 (1998).
- Launiainen, S. et al. Eddy covariance measurements of CO<sub>2</sub> and sensible and latent heat fluxes during a full year in a boreal pine forest trunk-space. *Boreal Env. Res.* **10(6)**, 569-588 (2005).
- Law, B.E. et al. Environmental controls over carbon dioxide and water vapor exchange of terrestrial vegetation. *Agric. For. Meteor.* **113(1-4)**, 97-120 (2002).

- Law, B.E., Williams, M., Anthoni, P.M., Baldocchi, D.D. and Unsworth, M.H. Measuring and modelling seasonal variation of carbon dioxide and water vapour exchange of a *Pinus ponderosa* forest subject to soil water deficit. *Global Change Biology* **6(6)**, 613-630 (2000).
- Law, F. Measurement of rainfall, interception and evaporation losses in a plantation of Sitka spruce trees. *IA SH2*, Toronto, pp 397-411 (1957).
- Le Maitre, D.C. and Versfeld, D.B. Forest evaporation models: relationships between stand growth and evaporation. *J. Hydrol.* **193**, 240-257 (1997).
- Ledger, D.C. The water balance of an exceptionally wet catchment area in West Africa. *J. Hydrol.* **24**, 207-214 (1975).
- Legates, D.R. and Mather, J.R. An evaluation of the average annual global water balance. *Geographical Review* **82(3)**, 253-267 (1992).
- Leopoldo, P.R., 1981a. in Bruijnzeel, 1990.
- Leopoldo, P.R., Chaves, J.G. and Franken, W.K. Solar energy budgets in central Amazonian ecosystems: a comparison between natural forest and bare soil areas. *Forest Ecology and Management*, **59**, 313-328 (1993).
- Leopoldo, P.R., Franken, W. and Solute, E. Water balance of a small catchment areas in "terra firma" Amazonian forest. *Acta Amazonia*, **12**, 333-337 (1982b).
- Leopoldo, P.R., Franken, W.K. and Nova, N.A.V. Real Evapotranspiration and Transpiration through a Tropical Rain-Forest in Central Amazonia as Estimated by the Water-Balance Method. *Forest Ecology and Management* **73(1-3)**, 185-195 (1995).
- Leppanen, O.E. Barren area evapotranspiration estimates generated from energy budget measurements in the Gila River Valley of Arizona. USGS Open-File Report, 80(1003) (1980).
- Leppanen, O.E. Evapotranspiration from forage grass replacing native vegetation in the Gila River Valley of Arizona. USGS Open-File Report, 81(485) (1981).
- Lesack, L.F.W. Water-Balance and Hydrologic Characteristics of a Rain-Forest Catchment in the Central Amazon Basin. *Water Resour. Res.* **29(3)**, 759-773 (1993).
- Lewis, D., Singer, M.J., Dahlgren, R.A. and Tate, K.W. Hydrology in a California oak woodland watershed: a 17-year study. *J. Hydrol.* **240**: 106-117 (2000).
- Lewis, D.C. Annual hydrologic response to watershed conversion from woodland to annual grassland. *Water Resour. Res.* **4**, 59-72 (1968).
- Lieth, R.M. and Solomon, S.I. Estimation of precipitation, evapotranspiration and runoff using GOES, Advances in Evapotranspiration. American Society of Agricultural Engineers, Chicago, IL, pp. 366-376 (1985).
- Lincare, E. Energy balance in a Chinese oasis (1997).
- Lindh, G. cited in Stephenson, 1994. *Res. Urban Hydrology* **2**, 229 (1978).
- Liu, C.M., Zhang, X.Y. and Zhang, Y.Q. Determination of daily evaporation and evapotranspiration of winter wheat and maize by large-scale weighing lysimeter and micro-lysimeter. *Agric. For. Meteor.* **111(2)**, 109-120 (2002a).
- Liu, J. and Kotoda, K. Estimation of regional evapotranspiration from arid and semi-arid surfaces. *JAWRA* **34(1)**, 27-41 (1998).
- Liu, S., Riekerk, H. and Gholz, H.L. Simulation of evapotranspiration from Florida pine flatwoods. *Ecological Modelling* **114**, 19-34 (1998).



- Liu, W.Z., Hunsaker, D.J., Li, Y.S., Xie, X.Q. and Wall, G.W. Inter-relations of yield, evapotranspiration, and water use efficiency from marginal analysis of water production functions. *Agricultural Water Management* **56(2)**, 143-151 (2002b).
- Lloyd, C.R. and Marques, A.D. Spatial Variability of Throughfall and Stemflow Measurements in Amazonian Rainforest. *Agric. For. Meteor.* **42(1)**, 63-73 (1988).
- Lockwood, J.G. The Physical Geography of the Tropics. I. An introduction. Oxford in Asia College Texts. (University of Oxford Press, London, 1976).
- Lodge, G.M., Murphy, S.R. and Johnson, I.R. Soil water balance modelling highlights limitations for pasture production in northern NSW. Proceedings of the 10th Australian Agronomy Conference; 29 January–1 February 2001. Hobart, Australia Australian Society of Agronomy (2001).
- Lodge, G.M., Murphy, S.R. and Johnson, I.R. Seasonal variation in long-term estimates of soil water balance predicted by the SGS Pasture Model for a native pasture in northern New South Wales, 17th annual conference of the Grassland Society of NSW. Grassland Society of NSW, Orange, NSW, Australia, pp. 60-62 (2002).
- Löfgren, S.E. Integrated monitoring of the environmental status in Swedish forest ecosystem - IM. Summary for 1997-2001 and annual report for 2001. 2004:7, Department of Environmental Assessment, Swedish University of Agricultural Sciences, Uppsala, Sweden (2004a).
- Löfgren, S.E. Integrated monitoring of the environmental status in Swedish forest ecosystem - IM. Annual report for 2002 - in print, Department of Environmental Assessment, Swedish University of Agricultural Sciences, Uppsala, Sweden (2004b).
- Lopes, T.J. Hydrology and water budget of Owens Lake, California. MS Thesis Thesis, University of Nevada, Reno (1986).
- Low, K.S. and Goh, G.C. The water balance of five catchments in Selangor, West Malaysia. *Journal of Tropical Geography*, **35**, 60-66 (1972).
- Luxmoore, R.J. Water budget of an eastern deciduous forest stand. *Soil Sci. Soc. Am. J.* **62**, 75-82 (1983).
- Machado, S. ET data for Columbia Basin Agricultural Research Centre, Pendleton, OR (2004).
- Mahmood, R. and Hubbard, K.G. Anthropogenic land-use change in the North American tall grass-short grass transition and modification of near-surface hydrologic cycle. *Climate Research* **21(1)**, 83-90 (2002).
- Major, J. A climatic index of vascular plant activity. *Ecology* **44**, 485 (1963).
- Makino, I., Ogawa, S. and Salto, G. Land cover change and its effect on runoff in the Doki River Catchment, ACRS 1999 (1999).
- Malek, E., Bingham, G.E. and Mccurdy, G.D. Evapotranspiration from the Margin and Moist Playa of a Closed Desert Valley. *J. Hydrol.* **120(1-4)**, 15-34 (1990).
- Malmer, A. Dynamics of hydrology and nutrient losses as response to establishment of forest plantation: a case study on tropical rainforest land in Sabah, Malaysia. PhD Thesis, Swedish University of Agricultural Science, Umea, Sweden (1993).
- Mao, L.M., Bergman, M.J. and Tai, C.C. Evapotranspiration measurement and estimation of three wetland environments in the Upper St. Johns River Basin, Florida. *JAWRA*, **38(5)**, 1271-1285 (2002).

- Marengo, J.A., Miller, J.R., Russell, G.L., Rosenzweig, C.E. and Abramopoulos, F. Calculations of River-Runoff in the Giss Gcm - Impact of a New Land-Surface Parameterization and Runoff Routing Model on the Hydrology of the Amazon River. *Climate Dynamics* **10(6-7)**, 349-361 (1994).
- Marengo, J.A. and Nobre, C.A. General characteristics and variability of climate in the Amazon basin and its links to the global climate system. In: M.E. McLain, R.L. Victoria and J.E. Richey (Editors), *The Biogeochemistry of the Amazon Basin*. pp. 365 (Oxford University Press, New York, 2001a).
- Marques, J., Marden dos Santos, J. and Salati, E. Calculo de evapotranspiracao na bacia Amazonica a traves do metodo aerologico. *Acta Amazonia* **10**, 357-361, ( 1980).
- Marques, J., Marden dos Santos, J., Villa Nova, N.A. and Salati, E. Precipitable water and water vapour flux between Belem and Manaus. *Acta Amazonia* **7(3)**, 355-362 (1977).
- Marsh, P. Evaporation and ice growth in Mackenzie Delta lakes, Vienna Symposium. *IAHS*, Publ. no. 206, pp. 257-266 (1991).
- Marsh, P. and Bigras, S.C. Evaporation from Mackenzie Delta Lakes, NWT, Canada. *Arctic and Alpine Research* **20(2)**, 220-229 (1988).
- Mather, J.R. The average annual water balance of the world, American Water Resources Association, Banff (1970).
- Mather, J.R. and Yoshioka, G.A. The role of climate in the distribution of vegetation. In: D.B. Carter and J.R. Mather (Editors), *Climate Classification for Environmental Biology*. Publications in Climatology, pp. 372-384 (1966).
- Matsuda, K. World water balance, analysis of FGGE IIIb data. In: J.S. Theon and N. Fugono (Editors), *Tropical Rainfall Measurements*. pp. 51-55 (A. Deepak Publishers, Hampton, Virginia, 1988b).
- Matsuyama, H. The water-budget in the Amazon River basin during the FGGE period. *J. Meteor. Soc. Japan*, **70(6)**, 1071-1084 ( 1992).
- Maykut, G.A. and Church, P.E. Radiation climate of Barrow, 1962-1966. *Journal of Applied Meteorology* **12**, 620-628 (1973).
- McMahon, J.P., Hutchinson, M.F., Nix, H.A. and Ord, K.D. ANUCLIM Version 1 User's Guide. ANU, CRES, Canberra (1996).
- Meyer, A.F. Evaporation from lakes and reservoirs, Minnesota Resources Commission, St. Paul, MN, USA (1942).
- Mierau, R. Supplemental water use in the Everglades Agricultural Area. 74-4, South Florida Water Management District, West Palm Beach, FL (1974).
- Mika, J., Horvath, S. and Makra, L. Impact of documented land use changes on the surface albedo and evapotranspiration in a plain watershed. *Phys Chem. Earth (B)* **26(7-8)**, 601-606 (2001).
- Miller, P.C. Plant and soil water storage in arctic and boreal forest ecosystems. In: A. Street-Perrott, M. Beran and R. Ratcliffe (Editors), *Variations in the Global Water Budget*. pp. 185-196 (Dordrecht, Boston, MA, 1983).
- Miyazaki, S. et al. Agrometeorological conditions of grassland vegetation in Central Mongolia and their impact for leaf area growth. *J. Geophys. Res.* **109(D22106)**, doi:10.1029/2004JD005179 (2004).
- Mo, X., Liu, S., Lin, Z. and Zhao, W. Simulating temporal and spatial variation of evapotranspiration over the Lushi basin. *J. Hydrol.* **285**, 125-142 ( 2004).

- Mocko, D.M. and Sud, Y.C. Comparison of a Land Surface Model (SSiB) to Three Parameterizations of Evapotranspiration - A Study Based on ISLSCP Initiative 1 Data. *Earth Interactions* **2(35)**, (1998).
- Moehrlen, C., Kiely, G. and Pahlow, M. Long term water budget in a grassland catchment in Ireland. *Phys. Chem. Earth (B)* **24(1-2)**, 23-29 (1999).
- Molchanov, A.A. The Hydrological Role of Forests. Israel Program for Scientific Translations, Jerusalem (1963).
- Molchanov, A.A. Vlianie lesa na okruzhaiushchuiu sredu (Forest effects on the environment). (Nauka, Moscow, 359 pp (1973).
- Molion, L.C.B. A climatonic study of the energy and moisture fluxes of the Amazonas Basin with considerations of deforestation effects. PhD Thesis, University of Wisconsin, Madison, Wisconsin (1975).
- Moran, R.J. and O'Shaughnessy, P.J. Determination of the Evapotranspiration of E-Regnans Forested Catchments Using Hydrological Measurements. *Agricultural Water Management* **8(1-3)**, 57-76 (1984).
- Morton, F.I. Catchment evaporation and potential evaporation - further development of a climatologic relationship. *J. Hydrol.*, 12: 81-89 ( 1971).
- Morton, F.I. Operational estimates of areal evapotranspiration and their significance to the science and practice of hydrology. *J. Hydrol.*, **66**, 1-76 (1983a).
- Morton, F.I. Operational estimates of Lake Evaporation. *J. Hydrol.* **66**, 77-100 (1983b).
- Morton, F.I. Evaporation research - a critical review and its lessons for the environmental sciences. *Critical Reviews in Environmental Science and Technology* **24**, 237-280 (1994).
- Movahed-Danech, A.A. Lac de Rezaieh - etude de l'equilibre naturel et le bilan hydrologique, Hydrology of Lakes symposium. IAHS, pp. 93-100 (1973).
- Mu, Q.Z., Zhao, M.S. and Running, S.W. Improvements to a MODIS global terrestrial evapotranspiration algorithm. *Remote Sensing of Environment* **115(8)**, 1781-1800 (2011).
- Murai, H. Forest Management for Conservation of Water Resources. Water Conservancy Sciences, Tokyo, Japan (1980).
- Murakami, S., Tsuboyama, Y., Shimizu, T., Fujieda, M. and Noguchi, S. Variation of evapotranspiration with stand age and climate in a small Japanese forested catchment. *J. Hydrol.* **227(1-4)**, 114-127 (2000).
- Murphy, S.R., Lodge, G.M. and Harden, S. Surface soil water dynamics in pastures in northern New South Wales. 3. Evapotranspiration. *Aust. J. Exp. Agr.* **44**, 571-583 (2004).
- Nakano, H. Effects of changes of forest conditions on water yield, peak flow and direct runoff of small watersheds in Japan. In: W.E. Sopper and H.W. Lull (Editors), *Forest Hydrology*. pp. 813 (Pergamon, Oxford, 1967).
- Nänni, U.W. The effect of afforestation on streamflow at Cathedral Peak. *S. Afr. For. J.* **74**, 6-12 (1970).
- National-Park-Service. Vegetation of Big Thicket, Texas. National Park Service (1982).
- Nature\_Consultants. Wetlands in Ireland. <http://www.enfo.ie/leaflets/fs7.htm> (1982).
- Nehaichik, V.P. Water balance of lakes in different phases of humidification cycles, Hydrology of Lakes. IAHS Publ. No. 109, pp. 167-169 (1973).

- Ni-Lar-Win. Contributions to rainfall-runoff modelling of basin scale. PhD Thesis, Vrije Universiteit Brussel, Brussels, Belgium (1994).
- Nichols, W.D. Regional ground-water evapotranspiration and ground-water budgets, Great Basin, Nevada. U.S. Geological Survey Professional Paper, 1628 (2000).
- Nijssen, B. and Lettenmaier, D. Effect of precipitation errors on simulated hydrological fluxes and states. *Geophysical Research Abstracts* **5(08043)**, EAE03-A-08043 (2003).
- Nijssen, B. and Lettenmaier, D.P. Water balance dynamics of a boreal forest watershed: White Gull Creek basin, 1994-1996. *Water Resour. Res.* **38(11)**, art. no.-1255 (2002).
- Nijssen, B., O'Donnell, G.M., Hamlet, A.F. and Lettenmaier, D.P. Hydrologic sensitivity of global rivers to climate change. *Climatic Change* **50(1-2)**, 143-175 (2001a).
- Nijssen, B., O'Donnell, G.M., Lettenmaier, D.P., Lohmann, D. and Wood, E.F. Predicting the discharge of global rivers. *J. Climate* **14(15)**, 3307-3323 (2001b).
- Nizhizawa, T. and Koike, Y. Amazon ecology and development, Tokyo (1992).
- Nouvellon et al. A process-based model for daily fluxes of water and carbon in shortgrass ecosystem. *Agric. For. Meteorol.* **100**, 137-153 (2000).
- Novick, K.A. et al. Carbon dioxide and water vapour exchange in a warm temperate grassland. *Oecologia* **138**, 259-274 (2004).
- Odum, H.T., Drewry, G. and Kline, J.R. Climate at El Verde 1963-1966. In: H.T. Odum and R.F. Pidgeon (Editors), *A Tropical Rain Forest*. Energy Comm., Washington, DC, pp. B347-B418 (1970b).
- Ohmura, A. Regional Water-Balance on the Arctic Tundra in Summer. *Water Resour. Res.* **18(2)**, 301-305 (1982).
- Oki, T. and al, e., 1999. in Marengo & Nobre 2001.
- Oki, T., Musiak, K., Matsuyama, H. and Masuda, K. Global Atmospheric Water-Balance and Runoff from Large River Basins. *Hydrol. Process.* **9(5-6)**, 655-678 (1995).
- Oliphant, A.J. et al. Interannual variability in energy and carbon exchange over a midwestern mixed hardwood deciduous forest. *Eos. Trans. AGU* **89(47)**, Abstract B11C-0757 (2002).
- Olivier, H. *Irrigation and Climate: New Aids to Engineering Planning and Development of Water Resources*. 250 pp (Edward Arnold, London, 1961).
- Omar, M.H. and El-Bakry, M.M. Estimation of evaporation from the lake of the Aswan High Dam (Lake Nasser) based on measurements over the lake. *Agricultural Meteorology* **23**, 293-308 (1981).
- Oyebande, L. Effects of tropical forest on water yield. In: E.R.C. Reynolds and R.B. Thompson (Editors), *Forests, Climate and Hydrology: Regional Impacts*. (United Nations Univ., Tokyo, 1988).
- Oyebande, L. and Balek, J. Humid warm sloping land. In: M. Falkenmark and T. Chapman (Editors), *Comparative Hydrology: An Ecological Approach to Land and Water Resources*. (UNESCO, Paris, 1989).
- Parton, W.J., Lauenroth, W.K. and Smith, F.M. Water loss from a shortgrass steppe. *Agricultural Meteorology* **24**, 97-109 (1981).
- Pattey, E. Data on evapotranspiration for agriculture, Agriculture Canada, Ottawa, Ontario (2004).

- Pavlov, A.V. Heat transfer of the soil and atmosphere at northern and temperate altitudes. *CRREL Draft Translation* **51**, 296 (1976).
- Paz, A., Neira, A. and Castelao, A. Soil water regime under pasture in the humid zone of Spain: validation of an empirical model and prediction of irrigation requirements. *Agricultural Water Management* **29**, 147-161 (1996).
- Pearce, A.J., O'Loughlin, C.L. and Rowe, L.K. Hydrologic regime of small undisturbed beech forest catchments, north Westland, N.Z. *Dep. Sci. Ind. Res., Info. Ser., No. 126*: 150-158 (1976).
- Pearce, A.J. and Rowe, L.K. Forest management effects on interception, evaporation and water yield. *J. Hydrology (N.Z)*, **18**, pp 730-158 (1976).
- Pearce, A.J. and Rowe, L.K. Forest management effects on interception, evaporation and water yield. *Journal of Hydrology (NZ)*, **18**, 73-87 (1979).
- Pereira, H.C. Research into the effects of land use on stream. *Trans. Rhod. Sci. Assoc. Proc.* **1**, 119-124 (1964).
- Petrone, R.M., Rouse, W.R. and Marsh, P. Comparative surface energy budgets in western and central subarctic regions of Canada. *Int. J. Climatol.* **20(10)**, 1131-1148 (2000).
- Piexoto, J.P. and Kettani, M.A. The control of the water cycle. *Scientific American* **228(4)**, 46-61 (1973).
- Pike, J.G. The estimation of annual runoff from meteorological data in tropical climate. *J. Hydrol.* **2**, 116-123 (1964).
- Pilgrim, D.J., Doran, D.G., Rowbottom, I.A., Mackay, S.M. and Tjendana, J. Water balance and runoff characteristics of mature and cleared pine and eucalypt catchments at Lidsdale, NSW. In: E.M. O'Loughlin and L.J. Bren (Editors), *The First National Symposium on Forest Hydrology*. The Institution of Engineers, Australia, Melbourne, Australia, pp. 103-110 (1982).
- Pinol, J., Lledo, M.J. and Escarre, A. Hydrological balance of two Mediterranean forested catchments (Prades, north-east Spain). *Hydrological Sciences Journal* **36**, 95-108 (1991).
- Poels, R. Soils, water and nutrients in a forest ecosystem in Suriname. PhD Thesis, Agricultural University, Wageningen, the Netherlands, 253 pp (1987).
- Poole, D.K., Roberts, S.W. and Miller, P.C. Water utilisation. In: P.C. Miller (Editor), *Resource Use by Chaparral and Matorral*. pp. 123-149 (Springer, New York, 1981).
- Porcher, R.D. The vascular flora of the Francis-Beidler-Forest in 4 Holes Swamp, Berkeley and Dorchester Counties, South-Carolina. *Castanea* **46(4)**. 248-280 (1981).
- Post, D.A. and Jones, J.A. Hydrologic regimes of forested, mountainous, headwater basins in New Hampshire, North Carolina, Oregon and Puerto Rico. *Adv. Water Res.* **24**, 1195-1210 (2001).
- Prata, A.J. Satellite derived evaporation from Lake Eyre. CSIRO, Aspendale, Australia (1989).
- Preito, D. and Angueira, C. Water stress effect on different growing stages for cotton and its influence on yield reduction. In: C. Kirda, P. Moutonnet, C. Hera and D.R. Nielsen (Editors), *Crop Yield Response to Defecit Irrigation*. pp. 161-179 (Kluwer Academic Publishers, Dordrecht, 1999).

- Prival'skii, V.E. Fluctuations of water level in a closed lake and their optimal probabilistic prediction. *Water Research (Vodnye Resursy)* **8(6)**, 571-584 (1981). Pudjiharta, 1986a. cited in Bruijnzeel 1988.
- Rao, V.B., Cavalcanti, I.F.A. and Hada, K. Annual variation of rainfall over Brazil and water vapor characteristics over South America. *J. Geophys. Res.* **101(D21)**, 26539-26551 (1996).
- Rauner, Y.L. Summarnoe isparenje lesnoi rastitelnosti (Evapotranspiration from forest vegetation). *Isv. AN SSSR. Ser. geogr.* **3**, 17-29 (1966).
- Raymond, L.H. and Rezin, K.V. Evapotranspiration estimates using remote-sensing data, Parker and Palo Verde valleys, Arizona and California, U.S. Geological Survey, Denver, Colorado (1989).
- Repetto, R. *The Global Possible: Resources, Development, and the New Century*. Yale University Press, New Haven, Connecticut (1985).
- Reynolds, J.F., Kemp, P.R. and Tenhunen, J.D. Effects of long-term rainfall variability on evapotranspiration and soil water distribution in the Chihuahuan Desert: a modelling analysis. *Plant Ecol.* **150**, 145-159 (2000).
- Ribiero, M.N.G. and Villa Nova, N.A. Estudo climatologico da reserva florestal Ducke. III. Evapotranspiracao. *Acta Amazonia* **9**, 305-309 (1979).
- Rich, L.R. Preliminary water yields after timber harvest on Castle Creek, Arizona watersheds, Arizona Watershed Symposium, pp. 9-12 (1968).
- Rich, L.R., Reynolds, H.G. and West, J.A. The Workman Creek experimental watershed. RM-65, U.S. Dep. Agric. For. Serv (1961).
- Richardson, J.H. Some implications of tropical forest replacement in Jamaica. *Zeitschrift fur Geomorphologie N.F.* **44**, 107-118 (1982).
- Richter, D. A comparison of various methods used for the determination of evaporation from free water surfaces, *Hydrology of Lakes*. IAHS Publ. **109**, pp. 233-238 (1973).
- Richter, D. and Koschel, R. The hydrometeorology of the Lake Stechlin area. In: S.J. Casper (Editor), *Lake Stechlin: A Temperate Oligotrophic Lake*. pp. 41-86 ( W. Junk, Dordrecht, 1985).
- Ridley, A.M., White, R.E., Simpson, R.J. and Callinan, L. Water use and drainage under phalaris, cocksfoot, and annual ryegrass pastures. *Australian Journal of Agricultural Research* **48(7)**, 1011-1024 (1997).
- Riehl, H. *Climate and Weather in the Tropics*. 611 pp (Academic Press, London, (1979).
- Riekerk, H. Lysimetric measurement of pine evapotranspiration for water balances, *Advances in Evapotranspiration*. American Society of Agricultural Engineers, Chicago, IL, pp. 276-281 (1985).
- Riou, 1984. in Bruijnzeel 1988.
- Roberts, G. The effects of possible future climate change on evaporation losses from four contrasting UK water catchment areas. *Hydrol. Process.* **12**, 727-739 (1998).
- Roche, M.A. Evapotranspiration reele de la foret amazonienne en Guyane. Cahiers ORSTOM, *Serie Hydrologie* **19**, 37-44 (1982a).
- Rockstrom, J., Gordon, L., Folke, C., Falkenmark, M. and Engwall, M. Linkages among water vapour flows, food production and terrestrial ecosystem services. *Conservation Ecology* **3(2)**, 44 p (1999).

- Romanov, V.V. Evaporation from bogs in the European territory of the USSR, US Department of Agriculture and NSF, Washington DC (1968).
- Roose, E.J. Dynamique actuelle d'un sol ferrallitique gravillonaire issu de granite sous culture et sous savane arbustive soudanienne du nord de la Cote d'Ivoire (Korhogo: 1967-1975). *ORMSTOM* **17**, 81-118 (1979).
- Rosenzweig, M.L. Net primary productivity of terrestrial communities: prediction from climatological data. *American Naturalist* **102**, 67-74 (1968).
- Rosset, M., Montani, M., Tanner, M. and Fuhrer J. Effects of abandonment on the energy balance and evapotranspiration of wet subalpine grassland. *Agriculture, Ecosystems and Environment* **86**, 277-286 (2001).
- Roulet, N.T. and Woo, M.K. Hydrology of a wetland in the continuous permafrost region. *J. Hydrol.* **89**, 73-91 (1986).
- Rouse, W.R. The energy and water balance of high-latitude wetlands: controls and extrapolation. *Global Change Biology* **6**, 59-68 (2000).
- Rowe, P.B. Streamflow increases after removing woodland riparian vegetation from a southern California watershed. *J. For.* **61**, 365-370 (1963).
- Running, S.W. et al. Mapping Regional Forest Evapotranspiration and Photosynthesis by Coupling Satellite Data with Ecosystem Simulation. *Ecology* **70(4)**, 1090-1101 (1989).
- Russell, G.L. and Miller, J.R. Global River Runoff Calculated from a Global Atmospheric General-Circulation Model. *J. Hydrol.* **117(1-4)**, 241-254 (1990).
- Rutter, A.J. Studies in the water relations of *Pinus sylvestris* in plantation conditions. II. The annual cycle of soil moisture change and derived estimates of evaporation. *Journal of Applied Ecology* **1**, 29-44 (1964).
- Sacks, L.A., Lee, T.M. and Radell, M.J. Comparison of Energy-Budget Evaporation Losses from 2 Morphometrically Different Florida Seepage Lakes. *J. Hydrol.* **156(1-4)**, 311-334 (1994).
- Sammis, T.W. and Gay, L.W. Evapotranspiration from an arid zone plant community. *Journal of Arid Environments* **2**, 313-321 (1979).
- San Jose, J.J. and Medina, E. Effect of fire on organic matter production and water balance in a tropical savanna. In: F.B. Golley and E. Medina (Editors), *Tropical Ecological Systems: Trends in Terrestrial and Aquatic Research. Ecological Studies*. pp. 251-264 (Springer, Berlin, 1975).
- San Jose, J.J. and Montes, R.A. Rainfall partitioning by a semideciduous forest grove in the savannas of the Orinoco Llanos, Venezuela. *J. Hydrol.*, **132(1-4)**, 249-262 (1992).
- Santos, A.J.B., Silva, G.T.D.A., Miranda, H.S., Miranda, A.C. and Lloyd, J. Effects of fire on surface carbon, energy and water vapour fluxes over campo sujo savanna in central Brazil. *Functional Ecology* **17(6)**, 711-719 (2003).
- Saranga, Y., Flash, I. and Yakir, D. Variation in water-use efficiency and its relation to carbon isotope ratio in cotton. *Crop Sci.* **38(3)**, 782-787 (1998).
- Sarwar, A. and Bastiaanssen, W.G.M. Long-term effects of irrigation water conservation on crop production and environment in semi-arid areas. *J. Irrig. Drain. Eng.* **127(6)**: 331-338 (2001).

- Schafer, K.V.R., Oren, R., Lai, C.T. and Katul, G.G., Hydrologic balance in an intact temperate forest ecosystem under ambient and elevated atmospheric CO<sub>2</sub> concentration. *Global Change Biology* **8(9)**, 895-911 (2002).
- Schellekens, J., Bruijnzeel, L.A., Scatena, F.N., Bink, N.J. and Holwerda, F. Evaporation from a tropical rain forest, Luquillo Experimental Forest, eastern Puerto Rico. *Water Resour. Res.* **36(8)**, 2183-2196 (2000).
- Schellekens, J., Bruijnzeel, L.A., Wickel, A.J., Scatena, F.N. and Silber, W.L. Interception of horizontal precipitation by elfin cloud forest in the Luquillo Mountains, eastern Puerto Rico. In: R.S. Schemenauer and H.A. Bridgman (Editors), *First International Conference on Fog and Fog Collection*. pp. 29-32 (ICRC, Ottawa, 1998).
- Scholes, R.J. and Walker, B.H. *An African Savanna: Synthesis of the Nylsvley Study*. Cambridge studies in applied ecology and resource management. Xii, 306 pp (Cambridge Univ. Press, England ; New York, 1993).
- Scott, D.F. and Lesch, W. Streamflow responses to afforestation with *Eucalyptus grandis* and *Pinus patula* and to felling in the Mokobulaan experimental catchments. *South Africa J. Hydrol.* **199**, 360-377 (1997).
- Scott, P.R. and Sudmeyer, R.A. Evapotranspiration from Agricultural Plant-Communities in the High Rainfall Zone of the Southwest of Western-Australia. *J. Hydrol.* **146(1-4)**, 301-319 (1993).
- Scott, R.L., Shuttleworth, W.J., Goodrich, D.C. and Maddock, T. The water use of two dominant vegetation communities in a semiarid riparian ecosystem. *Agric. For. Meteor.* **105(1-3)**, 241-256 (2000).
- Sene, K.J. Meteorological estimates for the water balance of a sparse vine crop growing in semiarid conditions. *J. Hydrol.* **179(1-4)**, 259-280 (1996).
- Shahin, M. Tile drainage of irrigated lands in Egypt. PhD Thesis, Cairo University, Cairo, Egypt (1959).
- Shahin, M. *Hydrology of the Nile Basin*. (Elsevier, Amsterdam, 1985).
- Sharma, M.L. Evapotranspiration from a *Eucalyptus* Community. *Agricultural Water Management* **8(1-3)**, 41-56 (1984).
- Sharma, T.C. An evaluation of evapotranspiration in tropical central Africa. *Hydrological Sciences Journal* **33(1)**, 31-40 (1988).
- Sharpe, D.M. The effective climate in the dynamics of alpine timberline systems in Colorado. *Publications in Climatology* **23**, 1-82 (1970).
- Shih, S.F. Evapotranspiration, yield, and water table studies of sweet corn. American Society of Agricultural Engineers Winter Meeting, pp. Paper No. 83-2526 (1983).
- Shih, S.F. and Gascho, G.J. Water requirement for sugarcane production. *Transactions of the ASAE* **23(4)**, 934-937 (1980).
- Shih, S.F. and Snyder, G.H. Water table effects on pasture yield and evapotranspiration. *Transactions of the ASAE* **28** (1985).
- Shiklomanov, I.A. World Fresh Water Resources. In: P.H. Gleick (Editor), *Water in Crisis: A guide to the World's Fresh Water Resources*. pp. 13-24 (Stockholm Environment Institute, Stockholm, 1993).
- Shiklomanov, I.A. Comprehensive Assessment of the Freshwater Resources of the World. UN, SEI, Stockholm (1997).



- Shiklomanov, I.A. World Water Resources and Water Use: Assessment and Outlook for 2025. In: F.R. Rijsberman (Editor), *World Water Scenarios: Analysis.*(World Water Council, SHI/UNESCO, 2000).
- Shiklomanov, I.A. and Krestovsky, O.I. The influence of forests and forest reclamation practices on streamflow and water balance. In: E.R.C. Reynolds and F.B. Thompson (Editors), *Forests, Climate and Hydrology.* pp. 78-116 (United Nations Univ., Tokyo 1988).
- Shimizu, A., Shimizu, T., Miyabuchi, Y. and Ogawa, Y. Evapotranspiration and runoff in a forest watershed, western Japan. *Hydrol. Process.* **17**, 3125-3139 (2003).
- Shnitnikov, A.V. Water balance variability of Lakes Aral, Balkhash, Issyk-kul and Chany, Hydrology of Lakes. *IAHS Publ. No.* **109**, pp. 130-140 (1973).
- Shuttleworth, W.J. Evaporation from Amazonian Rainforest. *Proceedings of the Royal Society of London Series B-Biological Sciences*, **233(1272)**, 321-346 (1988).
- Silberstein, R.P., Sivapalan, M. and Wyllie, A. On the validation of a coupled water and energy balance model at small catchment scales. *J. Hydrol.* **220**, **149-168** (1999).
- Simpson, R.J. et al. A strategic assessment of sustainability of grazed pasture systems in terms of their water balance, 9th Australian Agronomy Conference, Wagga Wagga, Australia, pp. 239-242 (1998).
- Sims, P.L., Singh, J.S. and Lauenroth, W.K. Structure and Function of 10 Western North-American Grasslands .1. Abiotic and Vegetational Characteristics. *Journal of Ecology* **66(1)**, 251-285 (1978).
- Smith-Carrington, A.K. Hydrological Bulletin for the Bua Catchment: Water Resource Unit Number Five, Groundwater Section, Department of Lands, Valuation and Water, Lilongwe, Malawi (1983).
- Solantie, R. Evaporation from the lakes in Finland, Hydrology of Lakes. IAHS, pp. 211-219 (1973).
- Sommer, R. et al. Transpiration and canopy conductance of secondary vegetation in the eastern Amazon. *Agric. For. Meteor.* **112(2)**, 103-121(2002).
- Soppe, R. Optimizing saline shallow groundwater use by crops. Ph.D. Thesis, University of California, Davis, CA (2000).
- Steinhardt, U. Untersuchungen über den Wasser- und Nährstoff-haushalt eines andinen Wolkenwaldes in Venezuela. *Göttinger Bodenkundliche Berichte* **56**, 1-185 (1979).
- Stephenson, D. Comparison of the water balance for an undeveloped and a suburban catchment. *Hydrological Sciences Journal* **39(4)**, 295-308 (1994).
- Sternitzke, D.A. and Elliott, R.L. Estimates of evapotranspiration in the Oklahoma Panhandle region, Summer Meeting of the American Society of Agricultural Engineers, San Luis Obispo, California, pp. 28 (1986).
- Stewart. The Basement Aquifer Research Report 1984-1989: final report to the Overseas Development Administration. Technical Report WD/89/15, British Geological Survey, Wallingford, U.K (1989).
- Stewart, R.B. and Rouse, W.R. Simple models for calculating evaporation from dry and wet surfaces. *Arctic and Alpine Research* **8**, 263-238 (1976).
- Stuart, L., Oberbauer, S.F. and Miller, P.C. Evapotranspiration measurements in *Eriophorum vaginatum* tussocks tundra in Alaska. *Holarc. Ecol.* **5**, 145-149 (1982).

- Styles, S. and Bernasconi, P. Demonstration of emerging irrigation technologies. B56936, California Department of Water Resources (1994).
- Sumner, D.M. Evapotranspiration from successional vegetation in a deforested area of the Lake Wales Ridge, Florida, U.S. Dept. of the Interior, U.S. Geological Survey, Tallahassee, Florida (1996).
- Sumner, D.M. Evapotranspiration from a Cypress and Pine Forest Subjected to Natural Fires, Volusia County, Florida, 1998-1999. U.S. Geological Survey, Tallahassee, Florida (2001).
- Sumner, D.M. Drought and fire effects on evapotranspiration from sawgrass in Florida. *Eos. Trans. AGU* **89(47)**, H61B-0755 (2002).
- Sun, G. et al. A comparison of the watershed hydrology of coastal forested wetlands and the mountainous uplands in the Southern US. *J. Hydrol.*, **263(1-4)**, 92-104 (2002).
- Sun, G., Riekerk, H. and Comerford, N.B. Modelling the hydrologic impacts of forest harvesting on Florida flatwoods. *JAWRA* **34(4)**, 843-854 (1998).
- Sweeten, J.M. and Jordan, W.R. Irrigation Water Management for the Texas High Plains: A Research Summary. TR-139, Texas Water Resources Institute, Texas A&M University, College Station, TX (1987).
- Swift, J., L.W. and Swank, W.T. Long term responses of streamflow following clearcutting and regrowth, On Influence of Man on the Hydrological Regime, Helsinki (1980).
- Szilagyi, J., Katul, G. and Parlange, M.B. Evapotranspiration intensifies over the coterminous United States. *J. Water Resour. Plann. Manage.-ASCE* 354-362 (2001).
- Tajchman, S.J., Fu, H. and Kochenderfer, J.N. Water and energy balance of a forested Appalachian watershed. *Agric. For. Meteor.* **84**, 61-68 (1997).
- Tattari, S. and Ikonen, J.-P. Modelling of areal hydrological variables within Hietajärvi IM catchment. In: S. Kleemola and M. Forsius (Editors), 6th Annual Report of the International Cooperative Programme on Integrated Monitoring of Air Pollution Effects on Ecosystems. Finnish Environment Institute, Helsinki, Finland, pp. 56 (1997).
- TEN. Texas Evapotranspiration Network. In: I.T. Center (Editor) (2004).
- Tetzlaff, G. and Adams, L.J. Present-day and early-Holocene evaporation of Lake Chad. In: A. Street-Perrott, M. Beran and R. Ratcliff (Editors), *Variations in the Global Water Budget*. pp. 347-360 (Kluwer, Oxford, UK, 1983).
- Thompson, N., Barrie, I.A. and Ayles, M. The Meteorological Office rainfall and evaporation calculation system: MORECS. *Hydrol. Mem.* **45**, (1981).
- Thorntwaite, C.W. and Mather, J.R. The Water Balance. *Publications in Climatology* **8(1)**, 86 (1955).
- Thornton, P.E. et al. Modeling and measuring the effects of disturbance history and climate on carbon and water budgets in evergreen needleleaf forests. *Agric. For. Meteor.* **113(1-4)**, 185-222 (2002).
- Tiktak, A. and Bouten, W. Soil-Water Dynamics and Long-Term Water Balances of a Douglas-Fir Stand in the Netherlands. *J. Hydrol.* **156(1-4)**, 265-283 (1994).
- Tomlinson, S.A. Evaluating evapotranspiration for six sites in Benton, Spokane, and Yakima counties, Washington, May 1990 to September 1992. U.S. Dept. of the Interior, U.S. Geological Survey, Tacoma, Washington, 84 p. pp (1996).

- Tomlinson, S.A. Evapotranspiration for three sparse-canopy sites in the Black Rock Valley, Yakima County, Washington, March 1992 to October 1995. U.S. Dept. of the Interior, U.S. Geological Survey, Tacoma, Washington, 88 p. pp (1997).
- Tsukamoto, Y. *Forest Hydrology*. Modern Forestry Series. (Buneido, Tokyo, Japan 1992).
- Tuvedendorzh, D. and Myagmarzhav, B. The atlas of the climate and ground water resources in Mongolian People's Republic. Institute of Meteorology and Hydrology, Mongolia, Ulaanbatar, 73 pp (1985).
- TVA, T.V.A. Forest cover improvement influences upon hydrologic characteristics of White Hollow watershed 1935-58, Tennessee Valley Authority, Div. Water Control Plann. Hydraul. Data Br., Cookeville Tenn (1961).
- Tyler, S.W. et al. Estimation of groundwater evaporation and salt flux from Owens Lake, California, USA. *J. Hydrol.* **200**, 110-135 (1997).
- Ullman, W.J. Evaporation rate from a salt pan: estimates derived from chemical profiles in near surface groundwaters. *J. Hydrol.* **79**, 365-373 (1985).
- UNEP. Atlas of Desertification. <http://www.geo.unizh.ch/rsl/fringe96/papers/morley-et-al/>, (Edward Arnold Publishers, London, UK, 1992)
- Unland, H.E. et al. Evaporation from a riparian system in a semi-arid environment. *Hydrol. Process.* **12**, 527-542 (1998).
- Unland, H.E., Houser, P.R., Shuttleworth, W.J. and Yang, Z.L. Surface flux measurement and modeling at a semi-arid Sonoran Desert site. *Agric. For. Meteor.* **82(1-4)**, 119-153 (1996).
- Urassa, J.K. and Raphael, E. The contribution of small scale dairy farming to community welfare: a case study of Morogoro municipality. Development Studies Institute, Sokoine University of Agriculture, Morogoro, Tanzania (2004).
- USDA. Evapotranspiration estimate for irrigated areas in Texas High Plains (2004).
- USGS and Harbeck. Water-loss investigations, USGS (1958).
- Vali-Khodjeini, A. Hydrology of the Caspian Sea and its problems, Vienna Symposium. *IAHS Publ. No.* **206**, 1991).
- Vallet-Coulomb, C., Legesse, D., Gasse, F., Travi, Y. and Chernet, T. Lake evaporation estimates in tropical Africa (Lake Ziway, Ethiopia). *J. Hydrol.* **245(1-4)**, 1-18 (2001).
- Van-der-Ven, 1988. cited in Stephenson, 1994.
- Van Dijk, A.I.J.M., Bruijnzeel, L.A. and Purwanto, E. The Cikumutuk Hydrology and Erosion Research Project (CHERP). Universiteit Amsterdam, Amsterdam, 16 pp (2001).
- Vardavas, I.M. A Simple Water-Balance Daily Rainfall Runoff Model with Application to the Tropical Magela Creek Catchment. *Ecological Modelling* **42(3-4)**, 245-264 (1988).
- Verburg, P. and Hecky, R.E. Surface Energy Balance Mixes Lake Tanganyika. *Eos. Trans. AGU* **H61B-0784** (2002).
- Vertessy, R.A. The impacts of forestry on streamflows: a review. In: J. Croke and P. Lane (Editors), Forest Management for Water Quality and Quantity. 2nd Forest Erosion Workshop. Cooperative Research Centre for Catchment Hydrology, Clayton, VIC, pp. 93-109 (1999).

- Vertessy, R.A. and Bessard, Y. Conversion of grasslands to plantations: anticipating the negative hydrological effects. In: D. Eldridge and D. Freudenberger (Editors), 6th International Rangeland Congress, Townsville, Australia, pp. 679-683 (1999).
- Vertessy, R.A., Hatton, T.J., Benyon, R.G. and Dawes, W.R. Long-term growth and water balance predictions for a mountain ash (*Eucalyptus regnans*) forest catchment subject to clear-felling and regeneration. *Tree Physiology* **16**, 221-232 (1996).
- Vertessy, R.A., Watson, F.G.R. and O'Sullivan, S.K. Factors determining relations between stand age and catchment water balance in mountain ash forests. *Forest Ecology and Management* **143(1-3)**, 13-26 (2001).
- Vertessy, R.A. et al. Predicting Water Yield from Mountain Ash Forest Catchments. Industry Report. 98/4, Cooperative Research Centre for Catchment Hydrology (1998).
- Vesala, T. and Launiainen, S. Annual ET data for Hyytiala. <http://www.honeybee.helsinki.fi/smear/>, Juupajoki, Finland (2004).
- Villa Nova, N.A., Salati, E. and Matsui, E. Estimativa da evapotranspiracao na bacia Amazonica. *Acta Amazonia* **6**, 215-228 (1976).
- Visher, F.N. and Hughes, G.H. The difference between rainfall and potential evaporation in Florida. Florida Bureau of Geology, Tallahassee, FL (1978).
- Vorosmarty, C.J. Global water assessment and potential contributions from Earth Systems Science. *Aquatic Science* **64**, 328-351 (2002).
- Vorosmarty, C.J. et al. A continental-scale model of water balance and fluvial transport: application to South America. *Global Biogeochemical Cycles* **3**, 241-265 (1989).
- Vorosmarty, C.J. et al. Analyzing the discharge regime of a large tropical river through remote sensing, ground-based climatic data, and modeling. *Water Resour. Res.* **32(10)**, 3137-3150 (1996).
- Vorosmarty, C.J. and Wilmott, C.J. A water budget closure system to support LBA hydrometeorology and ecology studies. <http://www.lba-hydronet.sr.unh.edu> (1999).
- Vourlitis, G.L. et al. Seasonal variations in the evapotranspiration of a transitional tropical forest of Mato Grosso, Brazil. *Water Resour. Res.* **38(6)**, art. no.-1094 (2002).
- Walker, G.E. and Eakin, T.E. Geology and groundwater of Amargosa Desert, Nevada-California (1963).
- Walter, M. and Hedin, L.O. Watershed-based separation of atmospheric input vectors. *Eos. Trans. AGU* **89(47)**, H52D-0914 (2002).
- Wanjura, D.F., Mahan, J.R. and Upchurch, D.R. Irrigation starting time effects on cotton under high-frequency irrigation. *Agronomy Journal* **88(4)**, 561-566 (1996).
- Waterloo, M.J. Water and nutrient dynamics of *Pinus caribaea* plantation forests on former grassland soils in southwest Viti Levu, Fiji, Vrije Universiteit Amsterdam (1994).
- Waterloo, M.J., Bruijnzeel, L.A., Vugts, H.F. and Rawaqa, T.T. Evaporation from *Pinus caribaea* plantations on former grassland soils under maritime tropical conditions. *Water Resour. Res.* **35(7)**, 2133-2144 (1999).
- Weltz, M.A. and Blackburn, W.H. Water-Budget for South Texas Rangelands. *Journal of Range Management* **48(1)**, 45-52 (1995).

- Wever, L.A., Flanagan, L.B. and Carlson, P.J. Seasonal and interannual variation in evapotranspiration, energy balance and surface conductance in a northern temperate grassland. *Agric. For. Meteor.* **112(1)**, 31-49 (2002).
- White, D.A., Dunin, F.X., Turner, N.C., Ward, B.H. and Galbraith, J.H. Water use by contour-planted belts of trees comprised of four Eucalyptus species. *Agric. Water Manage.* **53**, 133-152 (2002).
- White, M.A., Running, S.W. and Thornton, P.E. The impact of growing-season length variability on carbon assimilation and evapotranspiration over 88 years in the eastern US deciduous forest. *International Journal of Biometeorology*, **42**: 139-145 (1999).
- Whitehead, D. and Kelliher, F.M. A Canopy Water-Balance Model for a Pinus-Radiata Stand before and after Thinning. *Agric. For. Meteor.* **55(1-2)**, 109-126 (1991).
- Williams, M., Law, B.E., Anthoni, P.M. and Unsworth, M.H. Use of a simulation model and ecosystem flux data to examine carbon-water interactions in ponderosa pine. *Tree Physiology* **21**, 287-298 (2001).
- Williams, M. et al. Seasonal variation in net carbon exchange and evapotranspiration in a Brazilian rain forest: a modelling analysis. *Plant Cell and Environment* **21(10)**, 953-968 (1998).
- Wilson, K.B. and Baldocchi, D.D. Seasonal and interannual variability of energy fluxes over a broadleaved temperate deciduous forest in North America. *Agric. For. Meteor.* **100**, 1-18 (2000).
- Wilson, K.B., Hanson, P.J. and Baldocchi, D.D. Factors controlling evaporation and energy partitioning beneath a deciduous forest over an annual cycle. *Agric. For. Meteor.* **102**, 83-103 (2000).
- Wilson, K.B., Hanson, P.J., Mulholland, P.J., Baldocchi, D.D. and Wullschlegel, S.D. A comparison of methods for determining forest evapotranspiration and its components: sap-flow, soil water budget, eddy covariance and catchment water balance. *Agric. For. Meteor.* **106(2)**, 153-168 (2001).
- Wohlfahrt, G. and al., e. Unpublished Annual Evapotranspiration data from Neustift Meadow. Institute of Botany, University of Innsbruck  
<http://botany.uibk.ac.at/abteilungen/oekologie/woge.html> (2004).
- Wood, L.W. Limnology of remote lakes in the Adirondack region of New York State with emphasis on acidification problems, New York State Department of Health, New York (1978).
- WRI. World Resources 1988-1989. (Basic Books, New York, 1988).
- Wright, I.R. and Harding, R.J. Evaporation from Natural Mountain Grassland. *J. Hydrol.* **145(3-4)**, 267-283 (1993).
- Wu, X.B., Redeker, E.J. and Thurow, T.L. Vegetation and water yield dynamics in an Edwards Plateau watershed. *Journal of Range Management* **54**, 98-105 (2001).
- Xu, C.Y. Monthly water balance models in different climatic regions. PhD Thesis, Vrije Universiteit Brussel, Brussels, Belgium (1992).
- Yoshino, M.M. Climate and Agricultural Land Use in Monsoon Asia. (Univ. of Tokyo Press, Tokyo, (1984).
- Yunusa, I.A.M. et al. An assessment of the water budget for contrasting vegetation covers associated with waste management. *Hydrol. Process.* **24(9)**, 1149-1158 (2010).

- Zakia, M.J.B. O balanço hídrico levando-se em conta o sistema solo-planta-atmosfera de quatro tipos de coberturas vegetais na região de rio Mogol, MG. Piracicaba, Universidade de São Paulo, São Paulo, 136 pp (1987).
- Zamanov, K.D.. Water balance of the lakes and reservoirs of the Caucasus Minor (within the Azerbaijan SSR), Hydrology of Lakes. IAHS Publ. No , pp. 191-196 (1973).
- Zeng, N. Seasonal cycle and interannual variability in the Amazon hydrologic cycle. *J. Geophys. Res.* **104**, 9097-9106 (1999).
- Zhang, L., Dawes, W.R. and Walker, G.R. Predicting the effect of vegetation changes on catchment average water balance. 99/12, Cooperative Research Centre for Catchment Hydrology, Clayton, VIC (1999).
- Zhang, X., Friedl, M.A., Schaaf, C.B. and Strahler, A.H. Climate controls on vegetation phenological patterns in northern mid- and high latitudes inferred from MODIS data. *Global Change Biology* **10**, 1133-1145 (2004).
- Zubenok, L.I. Evaporation on the Continents. 264 pp (Gidrometeoizdat, Leningrad, , 1976).

Supplementary Table 2 for “The impact of global land cover change on the terrestrial water cycle”

Supplementary Table 2. For  $M_{GIS}$ , land cover classes, map data sources, number of ET point estimates and kriged global mean. To obtain the global kriged fields, the point estimates are constrained to follow global trends in precipitation<sup>1</sup>, soil moisture<sup>2</sup>, potential evapotranspiration, topography<sup>3</sup>, relative humidity<sup>1</sup>, and an estimate of global annual ET, not divided into land cover type<sup>2</sup>. In cases where the kriged field does not capture global trends in areas, estimates of annual actual ET were added, based upon other ET point-estimates from the database from similar land covers in similar climatic<sup>4</sup>, continental, land cover, topographic and latitudinal environments. For example, ET for open shrubland in the Middle East (dry climate, with precipitation in a cool winter, Bsk climate in the Koppen classification<sup>4</sup>) was estimated from open shrubland data from central USA (also Bsk climate). Sources are referenced below.

| Land Cover                   | Class         | # of ET point estimations | Kriged Global ET Mean (m/yr) | Map Resolution | Source | Source Map Land Cover Class                                                           |
|------------------------------|---------------|---------------------------|------------------------------|----------------|--------|---------------------------------------------------------------------------------------|
| Non-Irrigated Cropland       | anthropogenic | 79                        | 0.49                         | 5 min          | 5      | Percentage cover of cropland                                                          |
| Irrigated Cropland           | anthropogenic | 109                       | 1                            | 5 min          | 6      | Percentage cover or irrigated cropland                                                |
| Built-Up Lands               | anthropogenic | 36                        | 0.54                         | 5 min          | 7      | Percentage cover of urban areas                                                       |
| Reservoirs / Inundated Lands | anthropogenic | 211                       | 0.99                         | ½ min          | 9      | Presence / absence of cells containing reservoirs                                     |
| Grazing Land                 | anthropogenic | 140                       | 0.65                         | 5 min          | 8      | Percentage cover of grazing land                                                      |
| Burned Areas                 | anthropogenic | 5                         | 0.66                         | not mapped     | n/a    | not mapped because no global map available                                            |
| Tree Plantations             | anthropogenic | 124                       | 0.86                         | not mapped     | n/a    | not mapped because no global map available                                            |
| Evergreen Broadleaf Forests  | potential     | 171                       | 1.2                          | 5 min          | 5      | Tropical evergreen forest / woodland, temperate broadleaf evergreen forest / woodland |
| Evergreen Needleleaf Forests | potential     | 140                       | 0.5                          | 5 min          | 5      | Temperate needleleaf evergreen forest / woodland, boreal evergreen forest / woodland  |
| Deciduous Needleleaf Forests | potential     | 0                         | n/a                          | 5 min          | 5      | Deciduous needleleaf forests                                                          |
| Deciduous Broadleaf Forests  | potential     | 90                        | 0.77                         | 5 min          | 5      | Tropical and temperate deciduous forest / woodland                                    |
| Mixed Forests                | potential     | 41                        | 0.44                         | 5 min          | 5      | Mixed forest                                                                          |
| Savannah                     | potential     | 35                        | 0.74                         | 5 min          | 5      | Savannah                                                                              |
| Grasslands                   | potential     | 97                        | 0.45                         | 5 min          | 5      | Grassland, steppe                                                                     |
| Closed Shrubland             | potential     | 16                        | 0.59                         | 5 min          | 5      | Dense shrub                                                                           |
| Open Shrubland               | potential     | 54                        | 0.34                         | 5 min          | 5      | Open shrub                                                                            |
| Tundra                       | potential     | 36                        | 0.19                         | 5 min          | 5      | Tundra                                                                                |
| Barren Lands                 | potential     | 58                        | 0.17                         | 5 min          | 5      | Desert, polar desert, rock, ice                                                       |
| Wetlands                     | potential     | 71                        | 0.94                         | ½ min          | 9      | Presence of wetlands                                                                  |
| <b>TOTAL</b>                 |               | <b>1513</b>               |                              |                |        |                                                                                       |

- New, M. G., M. Hulme, and P. D. Jones. 1999. Representing 20th century space-time climate variability. I: Development of a 1961-1990 mean monthly terrestrial climatology. *Journal of Climate* 12:829-856.
- Willmott, C. J., and K. Matsuura. 2001. Terrestrial water budget data archive: monthly time series (1950-1999). in. Center for Climatic Research, University of Delaware, Newark, DE.
- Row, L. W., D. A. Hastings, and P. K. Dunbar. 2005. TerrainBase Worldwide Digital Terrain Data, release 1.0. in. National Oceanic and Atmosphere Administration (NOAA) and U.S. National Geophysical Data Center, Boulder, Colo.
- Trewartha, G. T. 1943. *An Introduction to Weather and Climate*. McGraw-Hill, New York.
- Ramankutty, N., and J. A. Foley. 1998. Characterizing patterns of global land use: An analysis of global croplands data. *Global Biogeochemical Cycles* 12:667-685.
- Siebert, S., P. Doll, S. Feick, and J. Hoogeveen. 2005. Global map of irrigated areas, version 2.2. University of Frankfurt, FAO, Rome, Italy.
- Miteva, B. 2004. Map of Built-up areas of the world. SAGE, Madison, Wisconsin, <http://www.sage.wisc.edu/atlas/maps.php?datasetid=18&includerelatedlinks=1&dataset=18>.
- Ramankutty, N. 2004. Map of Grazing Lands of the World. University of Wisconsin.
- Lehner, B., and P. Doll. 2004. Development and validation of a global database of lakes, reservoirs and wetlands. *Journal of Hydrology* 296:1-22.

SUPPLEMENTARY FIGURE 1 FOR “THE IMPACT OF GLOBAL LAND COVER CHANGE ON THE TERRESTRIAL WATER CYCLE”

a)

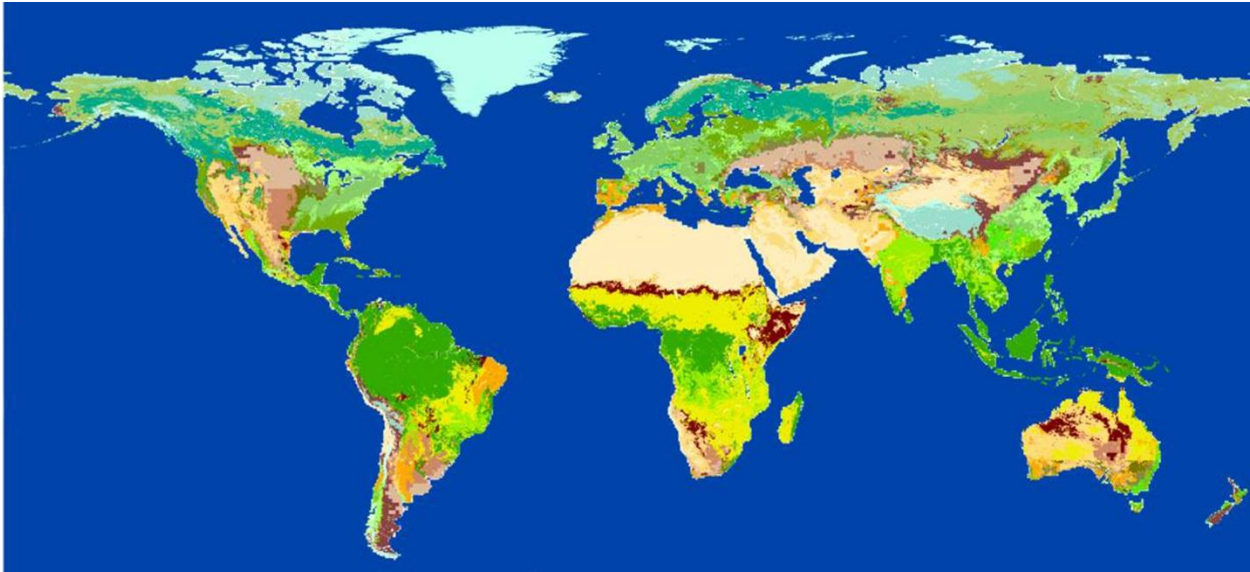

b)

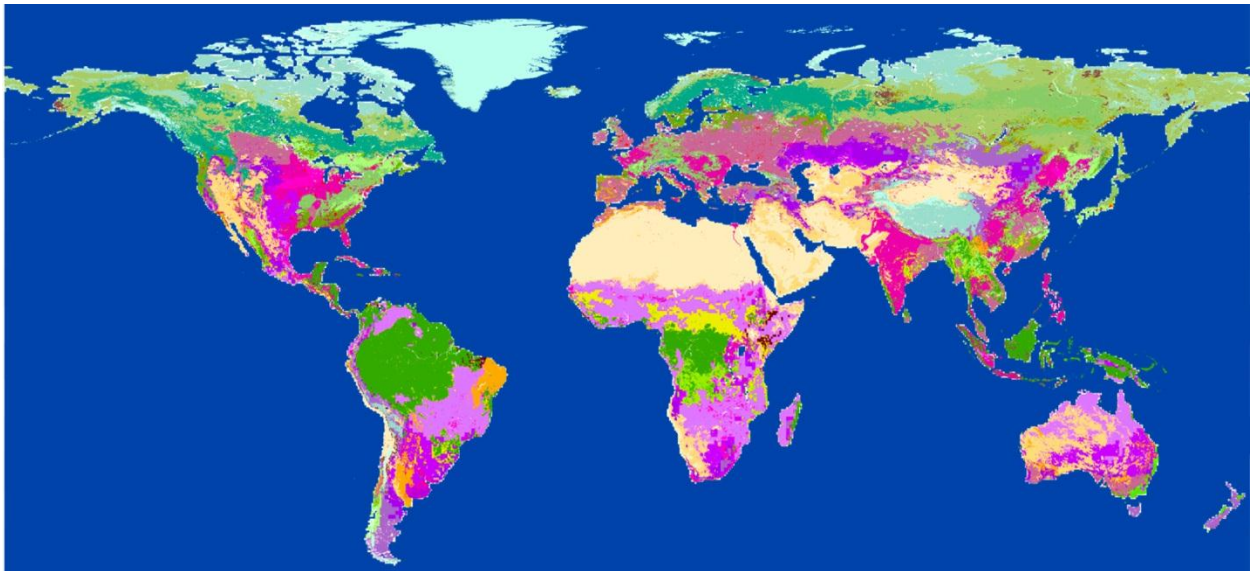



c)

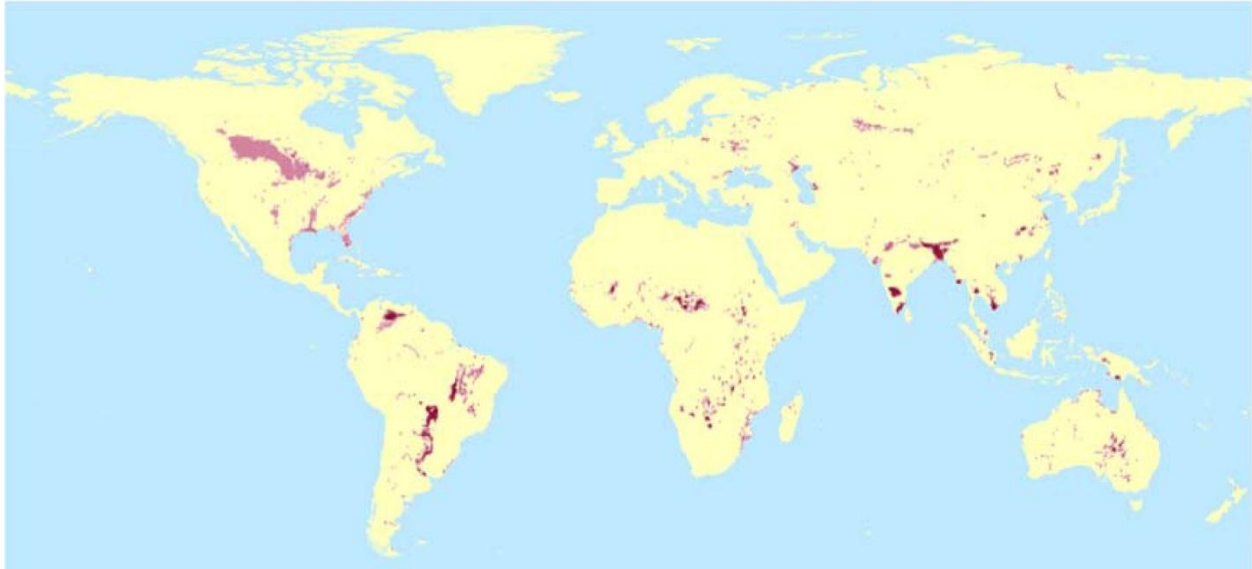

Figure 1. Maps of global land cover change for land surface model applications. (a) Potential land cover (PLC). Five-minute resolution, modified from Ramankutty and Foley (1998). C3/C4 divisions are based upon the work of Winslow et al. [2003]. Antarctica, Greenland, and Spitzbergen added from 5-min USGS GLCC. (b) Current land cover (CLC), where grazing has been censored. Dominant cover at a 5-min resolution. (c) Estimated wetland loss, defined at the 1-min resolution as wetland cells (as estimated by WELAREM [Lehner and Doll, 2004]) that coincide with anthropogenic land cells (as estimated from Figure 1b and scaled to 1-min resolution). The number of cells of wetland loss at the 1-min resolution has been aggregated to percentage of 1-min wetland loss cells in each 30-min cell for the purposes of Figure 1c only, to improve visibility of individual wetlands.

These figure panels are from Sterling, S., and A. Ducharne (2008), Comprehensive data set of global land cover change for land surface model applications, *Global Biogeochem. Cycles*, 22, GB3017, doi:10.1029/2007GB002959.

#### References:

Lehner, B. and P. Doll (2004), Development and validation of a global database of lakes, reservoirs and wetlands, *Journal of Hydrology*, 296, 1-22.

Ramankutty, N. and J.A. Foley (1998). Characterizing patterns of global land use: An analysis of global croplands data, *Global Biogeochem. Cycles* 12(4), 667-685.

Winslow, J.C., E.R. Hunt and S.C. Piper (2003). The influence of seasonal water availability on global C3 versus C4 grassland biomes and its implications for climate change research, *Ecological Modelling*, 163, 153-173.

# SUPPLEMENTARY METHODS FOR “THE IMPACT OF GLOBAL LAND COVER CHANGE ON THE TERRESTRIAL WATER CYCLE”

## 1. ADDITIONAL NOTES TO GENERAL METHODS

To convert units of m/yr or mm/yr to km<sup>3</sup>/yr, or to calculate percentage aerial change, we use a terrestrial area of 1.34e+14 m<sup>2</sup>.

The two methods of estimating change to evapotranspiration (ET) are independent calculations from essentially the same land cover data and have differing strengths and sources of uncertainty. The GIS-based estimate is based on observations and plot scale modelling studies, and provides an independent check on global land surface model and satellite-based estimates of ET, and also allows for a transparent examination of the components driving total cumulative ET flux (m<sup>3</sup>·yr<sup>-1</sup>) (TET) change. The land surface model (LSM) method uses a validated, process-based numerical experiment that provides a measure of statistical confidence. We preserve area altered in calculations of land cover change, in both the geographic information system (GIS) and LSM methods.

Independent lines of evidence, such as comparison with the GIS method in Figure 2a, in comparison with other studies (Figure 3) indicate that the offline LSM is behaving realistically on the first order. However, the coupled approach is necessary to estimate second order effects, particularly in areas of strong land-atmosphere coupling.

The definition of appropriation used in this study is not a measure of change in the water cycle but one of how close humans are approaching planetary limits. For example, if land cover 1 (LC1) is converted to a land cover 2 (LC2), the ET from LC2 is appropriated, even if the flux did not change; appropriation is a measure of land cover conversions, but it is not directly relevant to the water cycle.

## 2. METHODS AND ASSUMPTIONS IN THE CALCULATIONS FOR LSM ESTIMATES FOR FIGURE 2A

### ***Calculation of LSM estimate of change in ET for discrete land cover conversions in Figure 2a***

While possible in the GIS method, in the LSM method, direct cell to cell comparisons of change in ET from change from individual land cover types is not possible. This is because in the ORCHIDEE LSM each cell is a mosaic of one or more land cover types, and the water fluxes that come from a cell is a weighted average by area of each land cover ET. The LSM converts finer resolution land cover maps into a percent land cover composition mosaic for each LSM cell, which is then converted into a percentage plant functional type (PFT) composition mosaic, based on the correlation matrix between the land cover and PFT (Sterling & Ducharne, 2008). The LSM calculations of water and energy flows are weighted by the PFT percent composition in each cell. To create the LSM projections of change in Figure 2a, we calculate the statistical global average of each PFT, reconverted it back to a land cover type, based on the land cover correlation matrix, and then, to obtain ET change, compared the difference in average global ET for the second land cover type. Thus, in the LSM method, direct before-after land cover change comparisons for individual land cover changes that preserve spatial location is not possible, and the comparison will contain spatial bias.

In this way, the LSMs estimate of change in ET for individual types of land cover changes is not the same as the spatially unbiased GIS estimate which calculates each ET change on a cell by cell basis, and then takes the global average for each combination of land cover change (thus taking into account the location of each land cover change). Further, the LSM estimate of change in land cover is was not possible for some land covers, such as for wetlands, which was not available as a land cover parameterization, or for a comparison of built up land and bare soil, as the two land cover types have the same PFT parameterization in the LSM.

To calculate the change in ET with conversion from forests and from grasslands to non-irrigated croplands in Figure 2a, we used the estimate of C3 non-irrigated cropland. To calculate the change in ET with conversion from forests to grazing land in Figure 2a, we averaged the global mean ET estimate of C3 and C4 grazing land. For the comparison of irrigated cropland from barren land in Figure 2a, we used a non-irrigated bare soil ET for 15% of the estimate, instead of an irrigated bare soil ET, and used the C3 crop ET value.

### 3. METHODS AND ASSUMPTIONS IN CALCULATIONS FOR FIGURE 3

In Figure 3 we synthesize order of magnitude effects of anthropogenic drivers on runoff changes, in studies of change that is applicable to approximately the end of the 20<sup>th</sup> century. The anthropogenic drivers are land cover change at the end of the 20<sup>th</sup> century, changes in meteorological forcing during the 20<sup>th</sup> century, direct CO<sub>2atm</sub> effects on plants during the 20<sup>th</sup> century, and water withdrawals at the end of the 20<sup>th</sup> century.

#### *Land cover change*

Studies included are:

- Gerten *et al.* (2008)
- Gordon *et al.*, (2005) (both versions, with and without irrigation)
- Piao *et al.* (2007)
- Rost *et al.* (2008a)
- Rost *et al.* (2008b)
- Sterling *et al.* (this study) LSM method, irrigation included.
- Sterling *et al.* (this study) GIS method, here assuming no net change in surface storage, where change in ET volume is equal to change in annual runoff volume.

We include both equilibrium studies and 20<sup>th</sup> century transient simulations studies. For the latter, we estimate anthropogenic impact on global runoff by multiplying the average trend (e.g., in mm·yr<sup>-2</sup>) by the simulation length (yr), with the assumption that most of the anthropogenic impact occurred during the 20th century. Because large areas of land were converted previous to 1900, these 20<sup>th</sup> century transient studies will underestimate the total anthropogenic impact from land cover change on runoff.

We did not include Gedney *et al.* (2006) or Findell *et al.* (2007) because the simulations had a considerably smaller area of land cover change. Studies used in this data set varied in the type of land cover changes used; some studies include irrigation.

### *Direct CO<sub>2atm</sub> effects on plants during the 20<sup>th</sup> century*

These studies include estimates of the direct effect of CO<sub>2atm</sub> on plant physiology through changes in stomatal conductivity and leaf area.

Studies included are:

- Gerten *et al.* (2008)
- Alkama *et al.*, (2010)
- Piao *et al.*, (2007)

### *Changes in 20<sup>th</sup> century meteorological forcing, predominantly induced by anthropogenic increases in greenhouse gases*

To estimate of the impact of anthropogenically increased radiative forcing of the atmosphere via increases in greenhouse gases on global average runoff, we use the proxy driver of evolution of meteorological forcing in 20<sup>th</sup> century, as predominantly induced by human activities (Solomon *et al.*, 2007). In recent studies of anthropogenic change on the global water cycle, the 20<sup>th</sup> century is a common time period used to examine the impact on global runoff. However, because change during the 20<sup>th</sup> century is not fully anthropogenic, these projections may overestimate the role of anthropogenic radiative forcing of the atmosphere to change global average runoff.

Here we include studies that, over the 20<sup>th</sup> century, isolate radiative forcing as the sum of anthropogenic radiative effect and natural climate variation. These studies generally do not include direct atmospheric CO<sub>2</sub> effects on plant transpiration and leaf area. Thus, these studies consider the effect on runoff of the changes in climate variables (for example, precipitation, temperature, and wind) that can be attributed to the direct effect of radiative forcing over the 20<sup>th</sup> century; the radiative effects of solar dimming from aerosols are included in these estimates. The studies included are:

- Gerten *et al.* (2008). We use the sum of the two values referred to as “PRE” and “TMP”, which form the part of the total change in runoff that is not explained by direct atmospheric CO<sub>2</sub> effects, land cover change and irrigation. This value includes the change in runoff from solar dimming as caused by aerosols.
- Alkama *et al.* (2010). We use the value referred to as “climate change” in this study, which is the part of the total change that is not explained by direct atmospheric CO<sub>2</sub> effects on plant transpiration and leaf area and comprises the radiative effects of greenhouse gases, natural climate variations, and aerosols.
- Gedney *et al.* (2006). We use the sum of the values referred to as “climate change” and “aerosols” in this study. This change in annual runoff over 100 years is the part of the total change that is not explained by deforestation and direct atmospheric carbon dioxide (CO<sub>2</sub>) effects on plant transpiration. This value is the radiative effects of greenhouse gases on 20<sup>th</sup> century climate plus natural climate variations, and the impact of solar dimming from increased aerosols. This value does not include direct CO<sub>2</sub> effects on leaf area index.
- Piao *et al.* (2007). We use the value referred to as “climate change” in this study, which is the part of the total change that is not explained by the other factors considered in this study (land cover change, and direct atmospheric carbon dioxide (CO<sub>2</sub>) effects on plant transpiration and leaf area. This value is the radiative effects of greenhouse gases on 20<sup>th</sup> century climate plus natural climate variations, plus aerosols.

### *Water withdrawals and water consumption*

Estimates of annual water withdrawals include use for livestock, households, thermal power plants, manufacturing and irrigation.

Studies included are:

- Hanasaki *et al.* (2008)
- Döll and Siebert (2002)
- FAO (2007)
- Shiklomanov (2000)
- Wada *et al.* (2011)
- Shen *et al.* (2010)
- AQUASTAT (2002) (in Shen *et al.* (2008))
- Alcamo *et al.* (2007)
- Shiklomanov and Rodda (2003)

We estimate water consumption as the expected portion of global water withdrawals not returned to runoff, approximately 52% (Shiklomanov, 1999).

### *Estimate of total net change in global annual runoff*

An estimate of the total net anthropogenic forcing on global annual runoff is made by taking the sum of the average change in runoff for land cover change, CO<sub>2</sub><sub>atm</sub> plant effects, radiative forcing, and water consumption. We calculate the standard deviation of the net change to be the square root of the sum of the squared individual standard deviations, following the assumption that the different drivers are independent.

Detailed comparisons among the studies are not supported because of differences in experimental design (equilibrium vs. transient experiments, or coupled vs. off-line simulations), magnitude, location and duration of the forcing (e.g., different areas of land cover change altered (Sterling & Ducharne, 2008), different resolutions, time periods and duration of transient forcing experiments, and in assumptions about annual storage.

Despite these limitations, synthesizing the results of these studies provides an insight into the potential of drivers to alter the land surface hydrology, and provides a beginning for comparison and future refinement, with an eventual goal of being able to estimate a total net anthropogenic forcing on the annual runoff.

### *References*

Alcamo, J., Flörke, M., Marker, M., Future long-term changes in global water resources driven by socio-economic and climatic changes. *Hydrol. Sci. J.* **52**, 247-275 (2007).

Alkama, R., Kageyama, M., Ramstein, G., Relative contributions of climate change, stomatal closure, and leaf area index changes to 20<sup>th</sup> and 21<sup>st</sup> century runoff change: a modeling approach using the Organizing Carbon and Hydrology in Dynamic Ecosystems (ORCHIDEE) land surface model. *J. Geophys. Res.* **115**, doi:10.1029/2009JD013408 (2010).

Döll, P., Siebert, S., Global modeling of irrigation water requirements. *Water Resour. Res.* **38**, 8.1-8.10, DOI 10.1029/2001WR000355 (2002).

Findell, K.L., Shevliakova, E., Milly, P.C.D., Stouffer, R.J. Modeled impact of anthropogenic land cover change on climate. *J. Clim.* **20**, 3621-3634 (2007).

Food and Agriculture Organization (FAO), 2007. FAOSTAT. <<http://faostat.fao.org>>.

Gedney, N. *et al.* Detection of a direct carbon dioxide effect in continental river runoff records. *Nature* **439**, 835-838 (2006).

Gerten, D., Rost, S., von Bloh, W., Lucht, W., Causes of change in 20<sup>th</sup> century global river discharge. *Geophys. Res. Lett.* **35**, doi:10.1029/2008GL035258 (2008).

Gordon, L. J. *et al.* Human modification of global water vapour flows from the land surface. *Proc. Nat. Acad. Sci. USA* **102**, 7612-7617 (2005).

Hanasaki, N., *et al.*, An integrated model for the assessment of global water resources. *Hydrology and Earth System Sciences* **12**, 1027–1037 (2008).

Nohara, D., Kitoh, A., Hosaka, M., Oki, T., Impact of climate change on river discharge projected by multimodel ensemble. *J. Hydromet.* **7**, 1076-1089 (2006).

Piao, S. L. *et al.* Changes in climate and land use have a larger direct impact than rising CO<sub>2</sub> on global river runoff trends. *Proc. Nat. Acad. Sci. USA* **104**, 15242-15247, doi:DOI 10.1073/pnas.0707213104 (2007).

Rost, S., Gerten, D. & Heyder, U. Human alterations of the terrestrial water cycle through land management. *Advances in Geosciences* **18**, 43-50 (2008a).

Rost, S., *et al.* Agricultural green and blue water consumption and its influence on the global water system. *Wat. Resour. Res.* **44**, doi:10.1029/2007WR006331 (2008b).

Shen, Y., Oki, T., Utsumi, N., Kanae, S., Hanasaki, N., Projection of future world water resources under SRES scenarios: water withdrawal. *Hydrol. Sci. J.* **53** (2008).

Shen, Y., Chen, Y.N., Global perspective on hydrology, water balance, and water resources management in arid basins. *Hydrol. Process.* **24**, 129-135 (2010).

Shiklomanov, I.A., World water resources and water use: present assessment and outlook for 2005. In F. Rijberman, ed. *World water scenarios: analysis* (Chapter 12). World Water Vision (2000).

Shiklomanov, I.A., *World Resources 2000-2001, People and Ecosystems: The fraying Web of Life*. World Resources Institute, Washington D.C., 250 p. (1999).

Shiklomanov, I.A., Rodda, J.C., *World Water Resources at the Beginning of the Twenty-first Century*. Cambridge University Press, Cambridge UK, 452 p. (2003).

Solomon, S., *et al.*, (Eds.), *Contribution of Working Group I to the Fourth Assessment Report of the Intergovernmental Panel on Climate Change*, Cambridge University Press, Cambridge, UK and New York, NY, USA (2007).

Sterling, S., Ducharne, A. Comprehensive data set of global land cover change for land surface model applications. *Global Biogeochem. Cycles* **22**, DOI 10.1029/2007gb002959 (2008).

Wada, Y. *et al.* Global monthly water stress: 2. Water demand and severity of water stress. *Water Resour. Res.* **47**, doi:Artn W07518 Doi 10.1029/2010wr009792 (2011).
